# Supplementary material for: Comparative genomics highlight the importance of lineage-specific gene families in evolutionary divergence of the coral genus, Montipora
Source: BMC Ecol Evol. 2022 May 27;22:71. doi: 10.1186/s12862-022-02023-8 (PMC9145168; doi:10.1186/s12862-022-02023-8)
Supplement: Supplementary file 1 — Additional file 1: Table S1. Summary of comparison of KEGG metabolic pathways among acroporid genomes. MCR indicates the module completion ratio, calculated by GenoMaple. [file 12862_2022_2023_MOESM1_ESM.xlsx]

## Sheet: TableS1
Large category	Small category	KEGG module ID	Name(abbreviation)	MCR % (Adig)	MCR % (Aten)	MCR % (Amil)	MCR % (Astr)	MCR % (Mcac)	MCR % (Meff)
Carbohydrate metabolism	Central carbohydrate metabolism	M00001	Glycolysis (Embden-Meyerhof pathway), glucose => pyruvate	90	100	100	100	100	100
		M00002	Glycolysis, core module involving three-carbon compounds	83.3	100	100	100	100	100
		M00003	Gluconeogenesis, oxaloacetate => fructose-6P	87.5	100	100	100	100	100
		M00307	Pyruvate oxidation, pyruvate => acetyl-CoA	100	100	100	100	100	100
		M00009	Citrate cycle (TCA cycle, Krebs cycle)	87.5	87.5	87.5	87.5	87.5	87.5
		M00010	Citrate cycle, first carbon oxidation, oxaloacetate => 2-oxoglutarate	100	100	100	100	100	100
		M00011	Citrate cycle, second carbon oxidation, 2-oxoglutarate => oxaloacetate	80	80	80	80	80	80
		M00004	Pentose phosphate pathway (Pentose phosphate cycle)	100	100	100	100	100	100
		M00006	Pentose phosphate pathway, oxidative phase, glucose 6P => ribulose 5P	100	100	100	100	100	100
		M00007	Pentose phosphate pathway, non-oxidative phase, fructose 6P => ribose 5P	100	100	100	100	100	100
		M00580	Pentose phosphate pathway, archaea, fructose 6P => ribose 5P	50	50	50	50	50	50
		M00005	PRPP biosynthesis, ribose 5P => PRPP	100	100	100	100	100	100
		M00008	Entner-Doudoroff pathway, glucose-6P => glyceraldehyde-3P + pyruvate	50	50	50	50	50	50
		M00308	Semi-phosphorylative Entner-Doudoroff pathway, gluconate => glycerate-3P	40	40	40	40	40	40
		M00633	Semi-phosphorylative Entner-Doudoroff pathway, gluconate/galactonate => glycerate-3P	0	0	0	0	0	0
		M00309	Non-phosphorylative Entner-Doudoroff pathway, gluconate/galactonate => glycerate	0	0	0	0	0	0
		M00014	Glucuronate pathway (uronate pathway)	100	100	100	100	100	100
		M00630	D-Galacturonate degradation (fungi), D-galacturonate => glycerol	0	0	0	0	0	0
		M00631	D-Galacturonate degradation (bacteria), D-galacturonate => pyruvate + D-glyceraldehyde 3P	0	0	0	0	0	0
		M00061	D-Glucuronate degradation, D-glucuronate => pyruvate + D-glyceraldehyde 3P	0	0	0	0	0	0
		M00081	Pectin degradation	0	0	0	0	0	0
		M00632	Galactose degradation, Leloir pathway, galactose => alpha-D-glucose-1P	100	100	100	100	100	100
		M00552	D-galactonate degradation, De Ley-Doudoroff pathway, D-galactonate => glycerate-3P	40	40	40	40	40	40
		M00129	Ascorbate biosynthesis, animals, glucose-1P => ascorbate	100	100	100	100	100	100
		M00114	Ascorbate biosynthesis, plants, glucose-6P => ascorbate	44.4	44.4	44.4	44.4	44.4	44.4
		M00550	Ascorbate degradation, ascorbate => D-xylulose-5P	0	0	0	0	0	0
		M00565	Trehalose biosynthesis, D-glucose 1P => trehalose	16.7	16.7	16.7	16.7	16.7	16.7
		M00549	Nucleotide sugar biosynthesis, glucose => UDP-glucose	100	100	100	100	100	100
		M00554	Nucleotide sugar biosynthesis, galactose => UDP-galactose	100	100	100	100	100	100
		M00761	Undecaprenylphosphate alpha-L-Ara4N biosynthesis, UDP-GlcA => undecaprenyl phosphate alpha-L-Ara4N	0	0	0	0	0	0
		M00012	Glyoxylate cycle	80	80	80	100	80	80
		M00373	Ethylmalonyl pathway	33.3	33.3	33.3	33.3	33.3	33.3
		M00740	Methylaspartate cycle	36.4	36.4	36.4	36.4	36.4	36.4
		M00532	Photorespiration	40	50	50	60	60	60
		M00013	Malonate semialdehyde pathway, propanoyl-CoA => acetyl-CoA	100	100	100	100	100	100
		M00741	Propanoyl-CoA metabolism, propanoyl-CoA => succinyl-CoA	100	100	100	100	100	100
		M00130	Inositol phosphate metabolism, PI=> PIP2 => Ins(1,4,5)P3 => Ins(1,3,4,5)P4	100	100	100	100	100	100
		M00131	Inositol phosphate metabolism, Ins(1,3,4,5)P4 => Ins(1,3,4)P3 => myo-inositol	100	100	100	100	100	100
		M00132	Inositol phosphate metabolism, Ins(1,3,4)P3 => phytate	100	100	100	100	100	100
Energy metabolism	Carbon fixation	M00165	Reductive pentose phosphate cycle (Calvin cycle)	72.7	72.7	72.7	72.7	72.7	72.7
		M00166	Reductive pentose phosphate cycle, ribulose-5P => glyceraldehyde-3P	50	50	50	50	50	50
		M00167	Reductive pentose phosphate cycle, glyceraldehyde-3P => ribulose-5P	85.7	85.7	85.7	85.7	85.7	85.7
		M00168	CAM (Crassulacean acid metabolism), dark	50	50	50	50	50	50
		M00169	CAM (Crassulacean acid metabolism), light	50	50	50	50	50	50
		M00172	C4-dicarboxylic acid cycle, NADP - malic enzyme type	25	25	25	25	25	25
		M00171	C4-dicarboxylic acid cycle, NAD - malic enzyme type	57.1	57.1	57.1	57.1	57.1	57.1
		M00170	C4-dicarboxylic acid cycle, phosphoenolpyruvate carboxykinase type	50	50	50	50	50	50
		M00173	Reductive citrate cycle (Arnon-Buchanan cycle)	40	40	40	40	40	40
		M00376	3-Hydroxypropionate bi-cycle	23.1	23.1	23.1	23.1	23.1	23.1
		M00375	Hydroxypropionate-hydroxybutylate cycle	14.3	14.3	14.3	14.3	14.3	14.3
		M00374	Dicarboxylate-hydroxybutyrate cycle	7.7	7.7	7.7	7.7	7.7	7.7
		M00377	Reductive acetyl-CoA pathway (Wood-Ljungdahl pathway)	14.3	14.3	14.3	14.3	14.3	14.3
		M00579	Phosphate acetyltransferase-acetate kinase pathway, acetyl-CoA => acetate	0	0	0	0	0	0
		M00620	Incomplete reductive citrate cycle, acetyl-CoA => oxoglutarate	0	0	0	0	0	0
	Methane metabolism	M00567	Methanogenesis, CO2 => methane	0	0	0	0	0	0
		M00357	Methanogenesis, acetate => methane	20	20	20	20	20	20
		M00356	Methanogenesis, methanol => methane	0	0	0	0	0	0
		M00563	Methanogenesis, methylamine/dimethylamine/trimethylamine => methane	0	0	0	0	0	0
		M00358	Coenzyme M biosynthesis	0	0	0	0	0	0
		M00608	2-Oxocarboxylic acid chain extension, 2-oxoglutarate => 2-oxoadipate => 2-oxopimelate => 2-oxosuberate	0	0	0	0	0	0
		M00174	Methane oxidation, methanotroph, methane => formaldehyde	0	0	0	0	0	0
		M00346	Formaldehyde assimilation, serine pathway	44.4	44.4	44.4	44.4	44.4	44.4
		M00345	Formaldehyde assimilation, ribulose monophosphate pathway	33.3	33.3	33.3	33.3	33.3	33.3
		M00344	Formaldehyde assimilation, xylulose monophosphate pathway	50	50	50	50	50	50
		M00378	F420 biosynthesis	0	0	0	0	0	0
		M00422	Acetyl-CoA pathway, CO2 => acetyl-CoA	0	0	0	0	0	0
	Nitrogen metabolism	M00175	Nitrogen fixation, nitrogen => ammonia	0	0	0	0	0	0
		M00531	Assimilatory nitrate reduction, nitrate => ammonia	0	0	0	0	0	0
		M00530	Dissimilatory nitrate reduction, nitrate => ammonia	0	0	0	0	0	0
		M00529	Denitrification, nitrate => nitrogen	0	0	0	0	0	0
		M00528	Nitrification, ammonia => nitrite	0	0	0	0	0	0
		M00804	Complete nitrification, comammox, ammonia => nitrite => nitrate	0	0	0	0	0	0
	Sulfur metabolism	M00176	Assimilatory sulfate reduction, sulfate => H2S	33.3	33.3	33.3	33.3	33.3	33.3
		M00596	Dissimilatory sulfate reduction, sulfate => H2S	0	0	0	0	0	0
		M00595	Thiosulfate oxidation by SOX complex, thiosulfate => sulfate	0	0	0	0	0	0
Lipid metabolism	Fatty acid biosynthesis and degradation	M00082	Fatty acid biosynthesis, initiation	100	100	100	100	100	100
		M00083	Fatty acid biosynthesis, elongation	100	100	100	100	100	100
		M00085	Fatty acid biosynthesis, elongation, mitochondria	100	100	100	100	100	100
		M00415	Fatty acid biosynthesis, elongation, endoplasmic reticulum	100	100	100	100	100	100
		M00086	beta-Oxidation, acyl-CoA synthesis	100	100	100	100	100	100
		M00087	beta-Oxidation	100	100	100	100	100	100
	Sterol biosynthesis	M00101	Cholesterol biosynthesis, squalene 2,3-epoxide => cholesterol	20	20	20	30	10	10
		M00102	Ergocalciferol biosynthesis	0	0	0	40	0	0
		M00103	Cholecalciferol biosynthesis	0	0	0	0	0	0
		M00104	Bile acid biosynthesis, cholesterol => cholate/chenodeoxycholate	33.3	33.3	25	33.3	33.3	33.3
		M00106	Conjugated bile acid biosynthesis, cholate => taurocholate/glycocholate	50	50	50	50	50	0
		M00107	Steroid hormone biosynthesis, cholesterol => prognenolone => progesterone	0	0	50	0	0	0
		M00108	C21-Steroid hormone biosynthesis, progesterone => corticosterone/aldosterone	0	0	0	0	0	0
		M00109	C21-Steroid hormone biosynthesis, progesterone => cortisol/cortisone	50	50	50	50	50	50
		M00110	C19/C18-Steroid hormone biosynthesis, pregnenolone => androstenedione => estrone	33.3	33.3	33.3	33.3	33.3	33.3
	Lipid metabolism	M00088	Ketone body biosynthesis, acetyl-CoA => acetoacetate/3-hydroxybutyrate/acetone	80	80	80	80	80	80
		M00089	Triacylglycerol biosynthesis	100	100	100	100	100	100
		M00098	Acylglycerol degradation	100	100	100	100	100	100
		M00090	Phosphatidylcholine (PC) biosynthesis, choline => PC	100	100	100	100	100	100
		M00091	Phosphatidylcholine (PC) biosynthesis, PE => PC	100	100	100	100	100	100
		M00092	Phosphatidylethanolamine (PE) biosynthesis, ethanolamine => PE	100	100	100	100	100	100
		M00093	Phosphatidylethanolamine (PE) biosynthesis, PA => PS => PE	66.7	66.7	66.7	66.7	66.7	66.7
		M00094	Ceramide biosynthesis	100	100	100	100	100	100
		M00066	Lactosylceramide biosynthesis	50	50	50	50	50	100
		M00067	Sulfoglycolipids biosynthesis, ceramide/1-alkyl-2-acylglycerol => sulfatide/seminolipid	100	100	100	100	100	100
		M00099	Sphingosine biosynthesis	100	100	100	100	100	100
		M00100	Sphingosine degradation	100	100	100	100	100	100
		M00113	Jasmonic acid biosynthesis	12.5	12.5	12.5	12.5	12.5	12.5
Nucleotide metabolism	Purine metabolism	M00048	Inosine monophosphate biosynthesis, PRPP + glutamine => IMP	88.9	100	100	100	100	100
		M00049	Adenine ribonucleotide biosynthesis, IMP => ADP,ATP	75	100	100	100	100	100
		M00050	Guanine ribonucleotide biosynthesis IMP => GDP,GTP	100	100	100	100	100	100
		M00546	Purine degradation, xanthine => urea	100	83.3	83.3	100	100	83.3
	Pyrimidine metabolism	M00051	Uridine monophosphate biosynthesis, glutamine (+ PRPP) => UMP	66.7	100	100	100	100	100
		M00052	Pyrimidine ribonucleotide biosynthesis, UMP => UDP/UTP,CDP/CTP	100	100	100	100	100	100
		M00053	Pyrimidine deoxyribonuleotide biosynthesis, CDP/CTP => dCDP/dCTP,dTDP/dTTP	75	75	75	75	75	75
		M00046	Pyrimidine degradation, uracil => beta-alanine, thymine => 3-aminoisobutanoate	100	100	100	100	100	100
Amino acid metabolism	Serine and threonine metabolism	M00020	Serine biosynthesis, glycerate-3P => serine	100	100	100	100	100	100
		M00018	Threonine biosynthesis, aspartate => homoserine => threonine	0	0	0	0	0	0
		M00555	Betaine biosynthesis, choline => betaine	50	50	50	50	50	50
		M00033	Ectoine biosynthesis, aspartate => ectoine	0	0	0	0	0	0
	Cysteine and methionine metabolism	M00021	Cysteine biosynthesis, serine => cysteine	50	50	50	50	50	50
		M00338	Cysteine biosynthesis, homocysteine + serine => cysteine	50	50	50	50	50	50
		M00609	Cysteine biosynthesis, methionine => cysteine	16.7	16.7	16.7	16.7	16.7	16.7
		M00017	Methionine biosynthesis, apartate => homoserine => methionine	14.3	14.3	14.3	14.3	14.3	28.6
		M00034	Methionine salvage pathway	88.9	100	100	100	100	100
		M00035	Methionine degradation	75	75	75	75	75	75
		M00368	Ethylene biosynthesis, methionine => ethylene	33.3	33.3	33.3	33.3	33.3	33.3
	Branched-chain amino acid metabolism	M00019	Valine/isoleucine biosynthesis, pyruvate => valine / 2-oxobutanoate => isoleucine	25	50	50	50	50	50
		M00535	Isoleucine biosynthesis, pyruvate => 2-oxobutanoate	0	0	0	0	0	0
		M00570	Isoleucine biosynthesis, threonine => 2-oxobutanoate => isoleucine	40	60	60	60	60	60
		M00432	Leucine biosynthesis, 2-oxoisovalerate => 2-oxoisocaproate	0	0	0	0	0	0
		M00036	Leucine degradation, leucine => acetoacetate + acetyl-CoA	83.3	100	83.3	100	100	100
	Lysine metabolism	M00016	Lysine biosynthesis, succinyl-DAP pathway, aspartate => lysine	0	0	0	0	0	0
		M00525	Lysine biosynthesis, acetyl-DAP pathway, aspartate => lysine	0	0	0	0	0	0
		M00526	Lysine biosynthesis, DAP dehydrogenase pathway, aspartate => lysine	0	0	0	0	0	0
		M00527	Lysine biosynthesis, DAP aminotransferase pathway, aspartate => lysine	0	0	0	0	0	0
		M00030	Lysine biosynthesis, AAA pathway, 2-oxoglutarate => 2-aminoadipate => lysine	12.5	12.5	12.5	12.5	12.5	12.5
		M00433	Lysine biosynthesis, 2-oxoglutarate => 2-oxoadipate	0	0	0	0	0	0
		M00031	Lysine biosynthesis, mediated by LysW, 2-aminoadipate => lysine	0	0	0	0	0	0
		M00032	Lysine degradation, lysine => saccharopine => acetoacetyl-CoA	87.5	87.5	87.5	87.5	87.5	87.5
	Arginine and proline metabolism	M00028	Ornithine biosynthesis, glutamate => ornithine	25	25	25	25	25	25
		M00763	Ornithine biosynthesis, mediated by LysW, glutamate => ornithine	0	0	0	0	0	0
		M00844	Arginine biosynthesis, ornithine => arginine	66.7	66.7	100	100	100	100
		M00845	Arginine biosynthesis, glutamate => acetylcitrulline => arginine	14.3	28.6	28.6	28.6	28.6	28.6
		M00029	Urea cycle	80	80	100	100	100	80
		M00015	Proline biosynthesis, glutamate => proline	100	100	100	100	100	100
		M00047	Creatine pathway	100	100	100	100	100	100
	Polyamine biosynthesis	M00133	Polyamine biosynthesis, arginine => agmatine => putrescine => spermidine	75	75	75	75	75	75
		M00134	Polyamine biosynthesis, arginine => ornithine => putrescine	100	100	100	100	100	100
		M00135	GABA biosynthesis, eukaryotes, putrescine => GABA	100	100	100	100	100	100
		M00136	GABA biosynthesis, prokaryotes, putrescine => GABA	0	0	0	0	0	0
	Histidine metabolism	M00026	Histidine biosynthesis, PRPP => histidine	12.5	12.5	12.5	12.5	12.5	12.5
		M00045	Histidine degradation, histidine => N-formiminoglutamate => glutamate	75	75	75	75	75	75
	Aromatic amino acid metabolism	M00022	Shikimate pathway, phosphoenolpyruvate + erythrose-4P => chorismate	0	0	0	0	0	0
		M00023	Tryptophan biosynthesis, chorismate => tryptophan	0	0	0	0	0	0
		M00024	Phenylalanine biosynthesis, chorismate => phenylalanine	0	0	0	0	0	0
		M00025	Tyrosine biosynthesis, chorismate => tyrosine	50	50	50	50	50	50
		M00040	Tyrosine biosynthesis, prephanate => pretyrosine => tyrosine	0	0	0	0	0	0
		M00042	Catecholamine biosynthesis, tyrosine => dopamine => noradrenaline => adrenaline	25	25	25	25	50	50
		M00043	Thyroid hormone biosynthesis, tyrosine => triiodothyronine/thyroxine	0	0	0	0	0	0
		M00044	Tyrosine degradation, tyrosine => homogentisate	80	60	80	80	100	100
		M00533	Homoprotocatechuate degradation, homoprotocatechuate => 2-oxohept-3-enedioate	0	0	0	0	0	0
		M00545	Trans-cinnamate degradation, trans-cinnamate => acetyl-CoA	0	0	0	0	0	0
		M00037	Melatonin biosynthesis, tryptophan => serotonin => melatonin	0	25	25	0	25	25
		M00038	Tryptophan metabolism, tryptophan => kynurenine => 2-aminomuconate	85.7	85.7	85.7	85.7	85.7	85.7
	Other amino acid metabolism	M00027	GABA (gamma-Aminobutyrate) shunt	66.7	66.7	66.7	66.7	66.7	100
		M00369	Cyanogenic glycoside biosynthesis, tyrosine => dhurrin	0	0	0	0	0	0
		M00118	Glutathione biosynthesis, glutamate => glutathione	100	100	100	100	100	100
Glycan metabolism	Glycan biosynthesis	M00055	N-glycan precursor biosynthesis	84.6	100	100	100	100	100
		M00072	N-glycosylation by oligosaccharyltransferase	100	100	100	100	100	100
		M00073	N-glycan precursor trimming	100	100	100	100	100	100
		M00074	N-glycan biosynthesis, high-mannose type	33.3	33.3	33.3	33.3	33.3	33.3
		M00075	N-glycan biosynthesis, complex type	77.8	77.8	77.8	77.8	77.8	77.8
		M00056	O-glycan biosynthesis, mucin type core	75	75	75	75	75	75
		M00065	GPI-anchor biosynthesis, core oligosaccharide	100	87.5	100	100	87.5	87.5
		M00070	Glycosphingolipid biosynthesis, lacto-series, LacCer => Lc4Cer	100	100	100	100	100	100
		M00071	Glycosphingolipid biosynthesis, neolacto-series, LacCer => nLc4Cer	100	100	100	100	100	100
		M00068	Glycosphingolipid biosynthesis, globo-series, LacCer => Gb4Cer	0	0	0	50	0	0
		M00069	Glycosphingolipid biosynthesis, ganglio series, LacCer => GT3	0	0	0	0	0	0
	Glycosaminoglycan metabolism	M00057	Glycosaminoglycan biosynthesis, linkage tetrasaccharide	100	100	100	100	100	100
		M00058	Glycosaminoglycan biosynthesis, chondroitin sulfate backbone	100	100	100	100	100	100
		M00059	Glycosaminoglycan biosynthesis, heparan sulfate backbone	100	100	100	100	100	100
		M00076	Dermatan sulfate degradation	100	100	100	100	100	100
		M00077	Chondroitin sulfate degradation	100	100	100	100	100	100
		M00078	Heparan sulfate degradation	100	100	100	100	100	100
		M00079	Keratan sulfate degradation	100	100	100	100	100	100
	Lipopolysaccharide metabolism	M00060	Lipopolysaccharide biosynthesis, KDO2-lipid A	0	0	0	0	0	0
		M00063	CMP-KDO biosynthesis	0	0	0	0	0	0
		M00064	ADP-L-glycero-D-manno-heptose biosynthesis	0	0	0	0	0	0
Metabolism of cofactors and vitamins	Cofactor and vitamin metabolism	M00127	Thiamine biosynthesis, AIR => thiamine-P/thiamine-2P	20	20	20	20	20	20
		M00125	Riboflavin biosynthesis, GTP => riboflavin/FMN/FAD	25	25	25	25	25	25
		M00124	Pyridoxal biosynthesis, erythrose-4P => pyridoxal-5P	33.3	33.3	33.3	33.3	33.3	33.3
		M00115	NAD biosynthesis, aspartate => NAD	60	60	60	60	40	40
		M00810	Nicotine degradation, pyridine pathway, nicotine => 2,6-dihydroxypyridine/succinate semialdehyde	0	0	0	0	0	0
		M00811	Nicotine degradation, pyrrolidine pathway, nicotine => succinate semialdehyde	0	0	0	0	0	0
		M00622	Nicotinate degradation, nicotinate => fumarate	0	0	0	0	0	0
		M00119	Pantothenate biosynthesis, valine/L-aspartate => pantothenate	0	20	20	20	20	20
		M00120	Coenzyme A biosynthesis, pantothenate => CoA	100	100	100	100	100	75
		M00572	Pimeloyl-ACP biosynthesis, BioC-BioH pathway, malonyl-ACP => pimeloyl-ACP	16.7	16.7	16.7	16.7	16.7	16.7
		M00123	Biotin biosynthesis, pimeloyl-ACP/CoA => biotin	0	0	0	0	0	0
		M00573	Biotin biosynthesis, BioI pathway, long-chain-acyl-ACP => pimeloyl-ACP => biotin	0	0	0	0	0	0
		M00577	Biotin biosynthesis, BioW pathway, pimelate => pimeloyl-CoA => biotin	0	0	0	0	0	0
		M00126	Tetrahydrofolate biosynthesis, GTP => THF	60	60	60	60	60	60
		M00840	Tetrahydrofolate biosynthesis, mediated by ribA and trpF, GTP => THF	16.7	16.7	16.7	16.7	16.7	16.7
		M00841	Tetrahydrofolate biosynthesis, mediated by PTPS, GTP => THF	16.7	16.7	16.7	16.7	16.7	16.7
		M00842	Tetrahydrobiopterin biosynthesis, GTP => BH4	100	100	100	100	100	66.7
		M00843	L-threo-Tetrahydrobiopterin biosynthesis, GTP => L-threo-BH4	66.7	66.7	66.7	66.7	66.7	33.3
		M00140	C1-unit interconversion, prokaryotes	33.3	33.3	33.3	33.3	33.3	33.3
		M00141	C1-unit interconversion, eukaryotes	100	100	100	100	100	100
		M00121	Heme biosynthesis, glutamate => heme	80	80	80	80	80	80
		M00846	Siroheme biosynthesis, glutamate => siroheme	57.1	57.1	57.1	57.1	57.1	57.1
		M00847	Heme biosynthesis, archaea, siroheme => heme	0	0	0	0	0	0
		M00122	Cobalamin biosynthesis, cobinamide => cobalamin	14.3	14.3	14.3	14.3	14.3	14.3
		M00836	Coenzyme F430 biosynthesis, sirohydrochlorin => coenzyme F430	0	0	0	0	0	0
		M00117	Ubiquinone biosynthesis, prokaryotes, chorismate => ubiquinone	0	0	0	0	0	0
		M00128	Ubiquinone biosynthesis, eukaryotes, 4-hydroxybenzoate => ubiquinone	100	100	100	100	100	100
		M00116	Menaquinone biosynthesis, chorismate => menaquinone	0	0	0	0	0	0
		M00112	Tocopherol/tocotorienol biosynthesis	0	0	0	0	0	0
Biosynthesis of terpenoids and polyketides	Terpenoid backbone biosynthesis	M00095	C5 isoprenoid biosynthesis, mevalonate pathway	85.7	85.7	85.7	85.7	100	100
		M00849	C5 isoprenoid biosynthesis, mevalonate pathway, archaea	100	100	100	100	100	100
		M00096	C5 isoprenoid biosynthesis, non-mevalonate pathway	12.5	12.5	12.5	0	12.5	12.5
		M00364	C10-C20 isoprenoid biosynthesis, bacteria	50	50	50	0	50	50
		M00365	C10-C20 isoprenoid biosynthesis, archaea	50	50	50	0	50	50
		M00366	C10-C20 isoprenoid biosynthesis, plants	50	50	50	25	50	50
		M00367	C10-C20 isoprenoid biosynthesis, non-plant eukaryotes	100	100	100	66.7	100	100
	Other terpenoid biosynthesis	M00097	beta-Carotene biosynthesis, GGAP => beta-carotene	0	0	0	0	0	0
		M00372	Abscisic acid biosynthesis, beta-carotene => abscisic acid	0	0	0	0	0	0
		M00371	Castasterone biosynthesis, campesterol => castasterone	0	0	0	0	0	0
	Macrolide biosynthesis	M00773	Tylosin biosynthesis, methylmalonyl-CoA + malonyl-CoA => tylactone => tylosin	0	0	0	0	0	0
		M00774	Erythromycin biosynthesis, propanoyl-CoA + methylmalonyl-CoA => deoxyerythronolide B => erythromycin A/B	0	0	0	0	0	0
		M00775	Oleandomycin biosynthesis, malonyl-CoA + methylmalonyl-CoA => 8,8a-deoxyoleandolide => oleandomycin	0	0	0	0	0	0
		M00776	Pikromycin/methymycin/neomethymycin biosynthesis, methylmalonyl-CoA + malonyl-CoA => narbonolide/10-deoxymethynolide => pikromycin/methymycin/neomethymycin	0	0	0	0	0	0
		M00777	Avermectin biosynthesis, 2-methylbutanoyl-CoA/isobutyryl-CoA => 6,8a-Seco-6,8a-deoxy-5-oxoavermectin 1a/1b aglycone => avermectin A1a/B1a/A1b/B1b	0	0	0	0	0	0
	Enediyne biosynthesis	M00824	9-membered enediyne core biosynthesis, malonyl-CoA => 3-hydroxyhexadeca-4,6,8,10,12,14-hexaenoyl-ACP => 9-membered enediyne core	0	0	0	0	0	0
		M00825	10-membered enediyne core biosynthesis, malonyl-CoA => 3-hydroxyhexadeca-4,6,8,10,12,14-hexaenoyl-ACP => 10-membered enediyne core	0	0	0	0	0	0
		M00826	C-1027 benzoxazolinate moiety biosynthesis, chorismate => benzoxazolinyl-CoA	0	0	0	0	0	0
		M00827	C-1027 beta-amino acid moiety biosynthesis, tyrosine => 3-chloro-4,5-dihydroxy-beta-phenylalanyl-PCP	0	0	0	0	0	0
		M00828	Maduropeptin beta-hydroxy acid moiety biosynthesis, tyrosine => 3-(2-chloro-3-hydroxy-4-methoxyphenyl)-3-hydroxypropanoyl-PCP	0	0	0	0	0	0
		M00829	3,6-Dimethylsalicylyl-CoA biosynthesis, malonyl-CoA => 6-methylsalicylate => 3,6-dimethylsalicylyl-CoA	0	0	0	0	0	0
		M00830	Neocarzinostatin naphthoate moiety biosynthesis, malonyl-CoA => 2-hydroxy-5-methyl-1-naphthoate => 2-hydroxy-7-methoxy-5-methyl-1-naphthoyl-CoA	0	0	0	0	0	0
		M00831	Kedarcidin 2-hydroxynaphthoate moiety biosynthesis, malonyl-CoA => 3,6,8-trihydroxy-2-naphthoate => 3-hydroxy-7,8-dimethoxy-6-isopropoxy-2-naphthoyl-CoA	0	0	0	0	0	0
		M00832	Kedarcidin 2-aza-3-chloro-beta-tyrosine moiety biosynthesis, azatyrosine => 2-aza-3-chloro-beta-tyrosyl-PCP	0	0	0	0	0	0
		M00834	Calicheamicin orsellinate moiety biosynthesis, malonyl-CoA => orsellinate-ACP => 5-iodo-2,3-dimethoxyorsellinate-ACP	0	0	0	0	0	0
		M00833	Calicheamicin biosynthesis, calicheamicinone => calicheamicin	0	0	0	0	0	0
	Type II polyketide biosynthesis	M00778	Type II polyketide backbone biosynthesis, acyl-CoA + malonyl-CoA => polyketide	0	0	0	0	0	0
		M00779	Dihydrokalafungin biosynthesis, octaketide => dihydrokalafungin	0	0	0	0	0	0
		M00780	Tetracycline/oxytetracycline biosynthesis, pretetramide => tetracycline/oxytetracycline	0	0	0	0	0	0
		M00823	Chlortetracycline biosynthesis, pretetramide => chlortetracycline	0	0	0	0	0	0
		M00781	Nogalavinone/aklavinone biosynthesis, deoxynogalonate/deoxyaklanonate => nogalavinone/aklavinone	0	0	0	0	0	0
		M00782	Mithramycin biosynthesis, 4-demethylpremithramycinone => mithramycin	0	0	0	0	0	0
		M00783	Tetracenomycin C/8-demethyltetracenomycin C biosynthesis, tetracenomycin F2 => tetracenomycin C/8-demethyltetracenomycin C	0	0	0	0	0	0
		M00784	Elloramycin biosynthesis, 8-demethyltetracenomycin C => elloramycin A	0	0	0	0	0	0
	Polyketide sugar unit biosynthesis	M00793	dTDP-L-rhamnose biosynthesis	0	0	0	0	0	0
		M00794	dTDP-6-deoxy-D-allose biosynthesis	0	0	0	0	0	0
		M00795	dTDP-beta-L-noviose biosynthesis	0	0	0	0	0	0
		M00796	dTDP-D-mycaminose biosynthesis	0	0	0	0	0	0
		M00797	dTDP-D-desosamine biosynthesis	0	0	0	0	0	0
		M00798	dTDP-L-mycarose biosynthesis	0	0	0	0	0	0
		M00799	dTDP-L-oleandrose biosynthesis	0	0	0	0	0	0
		M00800	dTDP-L-megosamine biosynthesis	0	0	0	0	0	0
		M00801	dTDP-L-olivose biosynthesis	0	0	0	0	0	0
		M00802	dTDP-D-forosamine biosynthesis	0	0	0	0	0	0
		M00803	dTDP-D-angolosamine biosynthesis	0	0	0	0	0	0
Biosynthesis of other secondary metabolites	beta-Lactam biosynthesis	M00672	Penicillin biosynthesis, aminoadipate + cycteine + valine => penicillin	0	0	0	0	0	0
		M00673	Cephamycin C biosynthesis, aminoadipate + cycteine + valine => cephamycin C	0	0	0	0	0	0
		M00675	Carbapenem-3-carboxylate biosynthesis, pyrroline-5-carboxylate + malonyl-CoA => carbapenem-3-carboxylate	0	0	0	0	0	0
		M00736	Nocardicin A biosynthesis, L-pHPG + arginine + serine => nocardicin A	0	0	0	0	0	0
		M00674	Clavaminate biosynthesis, arginine + glyceraldehyde-3P => clavaminate	0	0	0	0	0	0
	Biosynthesis of other secondary metabolites	M00039	Monolignol biosynthesis, phenylalanine/tyrosine => monolignol	10	20	20	20	20	20
		M00137	Flavanone biosynthesis, phenylalanine => naringenin	20	20	20	20	20	20
		M00138	Flavonoid biosynthesis, naringenin => pelargonidin	0	0	0	0	0	0
		M00661	Paspaline biosynthesis, geranylgeranyl-PP + indoleglycerol phosphate => paspaline	0	0	0	0	0	0
		M00370	Glucosinolate biosynthesis, tryptophan => glucobrassicin	0	0	0	0	0	0
		M00814	Acarbose biosynthesis, sedoheptulopyranose-7P => acarbose	0	0	0	0	0	0
		M00815	Validamycin A biosynthesis, sedoheptulopyranose-7P => validamycin A	0	0	0	0	0	0
		M00786	Fumitremorgin alkaloid biosynthesis, tryptophan + proline => fumitremorgin C/A	0	0	0	0	0	0
		M00789	Rebeccamycin biosynthesis, tryptophan => rebeccamycin	0	0	0	0	0	0
		M00790	Pyrrolnitrin biosynthesis, tryptophan => pyrrolnitrin	0	0	0	0	0	0
		M00805	Staurosporine biosynthesis, tryptophan => staurosporine	0	0	0	0	0	0
		M00808	Violacein biosynthesis, tryptophan => violacein	0	0	0	0	0	0
		M00835	Pyocyanine biosynthesis, chorismate => pyocyanine	0	0	0	0	0	0
		M00837	Prodigiosin biosynthesis, L-proline => prodigiosin	0	0	0	0	0	0
		M00838	Undecylprodigiosin biosynthesis, L-proline => undecylprodigiosin	0	0	0	0	0	0
		M00785	Cycloserine biosynthesis, arginine/serine => cycloserine	0	0	0	0	0	0
		M00787	Bacilysin biosynthesis, prephenate => bacilysin	0	0	0	0	0	0
		M00788	Terpentecin biosynthesis, GGAP => terpentecin	0	0	0	0	0	0
		M00819	Pentalenolactone biosynthesis, farnesyl-PP => pentalenolactone	0	0	0	0	0	0
		M00848	Aurachin biosynthesis, anthranilate => aurachin A	0	0	0	0	0	0
Xenobiotics biodegradation	Aromatics degradation	M00538	Toluene degradation, toluene => benzoate	0	0	0	0	0	0
		M00537	Xylene degradation, xylene => methylbenzoate	0	0	0	0	0	0
		M00419	Cymene degradation, p-cymene => p-cumate	0	0	0	0	0	0
		M00547	Benzene/toluene degradation, benzene => catechol / toluene => 3-methylcatechol	0	0	0	0	0	0
		M00548	Benzene degradation, benzene => catechol	0	0	0	0	0	0
		M00551	Benzoate degradation, benzoate => catechol / methylbenzoate => methylcatechol	0	0	0	0	0	0
		M00637	Anthranilate degradation, anthranilate => catechol	0	0	0	0	0	0
		M00568	Catechol ortho-cleavage, catechol => 3-oxoadipate	0	0	0	0	0	0
		M00569	Catechol meta-cleavage, catechol => acetyl-CoA / 4-methylcatechol => propanoyl-CoA	0	0	0	0	0	0
		M00539	Cumate degradation, p-cumate => 2-oxopent-4-enoate + 2-methylpropanoate	0	0	0	0	0	0
		M00543	Biphenyl degradation, biphenyl => 2-oxopent-4-enoate + benzoate	0	0	0	0	0	0
		M00544	Carbazole degradation, carbazole => 2-oxopent-4-enoate + anthranilate	0	0	0	0	0	0
		M00418	Toluene degradation, anaerobic, toluene => benzoyl-CoA	0	0	0	0	0	0
		M00541	Benzoyl-CoA degradation, benzoyl-CoA => 3-hydroxypimeloyl-CoA	0	0	0	0	0	0
		M00540	Benzoate degradation, cyclohexanecarboxylic acid =>pimeloyl-CoA	0	0	0	0	0	0
		M00534	Naphthalene degradation, naphthalene => salicylate	0	0	0	0	0	0
		M00638	Salicylate degradation, salicylate => gentisate	0	0	0	0	0	0
		M00624	Terephthalate degradation, terephthalate => 3,4-dihydroxybenzoate	0	0	0	0	0	0
		M00623	Phthalate degradation, phthalate => protocatechuate	0	0	0	0	0	0
		M00636	Phthalate degradation, phthalate => protocatechuate	0	0	0	0	0	0
Note: MCR indicates module completion ratio calculated by GenoMaple.
