# Supplementary material for: Comparative genomics highlight the importance of lineage-specific gene families in evolutionary divergence of the coral genus, Montipora
Source: BMC Ecol Evol. 2022 May 27;22:71. doi: 10.1186/s12862-022-02023-8 (PMC9145168; doi:10.1186/s12862-022-02023-8)
Supplement: Supplementary file 2 — Additional file 2: Table S2. IDs of gene families common to Montipora and Astreopora or restricted to Montipora, that are expressed during three life stages (planula larvae, metamorphosed larvae, and recruits). [file 12862_2022_2023_MOESM2_ESM.xlsx]

## Sheet: Table S2
Gene family group	Gene family ID
Resricted to Montipora	HOG0000034
	HOG0000037
	HOG0000103
	HOG0000116
	HOG0000212
	HOG0000214
	HOG0000321
	HOG0000324
	HOG0000332
	HOG0000342
	HOG0000405
	HOG0000463
	HOG0000508
	HOG0000616
	HOG0000646
	HOG0000649
	HOG0000822
	HOG0000932
	HOG0000999
	HOG0001001
	HOG0001033
	HOG0001078
	HOG0001134
	HOG0001263
	HOG0001396
	HOG0001516
	HOG0001570
	HOG0001714
	HOG0001857
	HOG0001879
	HOG0001887
	HOG0002030
	HOG0002307
	HOG0002309
	HOG0002376
	HOG0002496
	HOG0002554
	HOG0002583
	HOG0002596
	HOG0002658
	HOG0002659
	HOG0002685
	HOG0002686
	HOG0002728
	HOG0002760
	HOG0002821
	HOG0002883
	HOG0002934
	HOG0003064
	HOG0003136
	HOG0003214
	HOG0003247
	HOG0003248
	HOG0003290
	HOG0003349
	HOG0003454
	HOG0003515
	HOG0003631
	HOG0003679
	HOG0003699
	HOG0003776
	HOG0003779
	HOG0003785
	HOG0003786
	HOG0003866
	HOG0003958
	HOG0003959
	HOG0004075
	HOG0004107
	HOG0004205
	HOG0004210
	HOG0004211
	HOG0004212
	HOG0004242
	HOG0004277
	HOG0004312
	HOG0004508
	HOG0004580
	HOG0004670
	HOG0004958
	HOG0004959
	HOG0004972
	HOG0004973
	HOG0004996
	HOG0005041
	HOG0005076
	HOG0005082
	HOG0005132
	HOG0005148
	HOG0005189
	HOG0005192
	HOG0005198
	HOG0005226
	HOG0005282
	HOG0005376
	HOG0005423
	HOG0005426
	HOG0005552
	HOG0005562
	HOG0005571
	HOG0005580
	HOG0005741
	HOG0005809
	HOG0005814
	HOG0005832
	HOG0005904
	HOG0005905
	HOG0005933
	HOG0005947
	HOG0005954
	HOG0005963
	HOG0006037
	HOG0006085
	HOG0006115
	HOG0006131
	HOG0006176
	HOG0006238
	HOG0006243
	HOG0006277
	HOG0006301
	HOG0006531
	HOG0006619
	HOG0006652
	HOG0006666
	HOG0006668
	HOG0006681
	HOG0006742
	HOG0006771
	HOG0006806
	HOG0006892
	HOG0006926
	HOG0006972
	HOG0007011
	HOG0007049
	HOG0007079
	HOG0007098
	HOG0007254
	HOG0007269
	HOG0007284
	HOG0007293
	HOG0007375
	HOG0007410
	HOG0007460
	HOG0007474
	HOG0007481
	HOG0007548
	HOG0007632
	HOG0007664
	HOG0007697
	HOG0007922
	HOG0007938
	HOG0007939
	HOG0007940
	HOG0007944
	HOG0007948
	HOG0008062
	HOG0008153
	HOG0008160
	HOG0008403
	HOG0008407
	HOG0008452
	HOG0008559
	HOG0008575
	HOG0008610
	HOG0008667
	HOG0008848
	HOG0009020
	HOG0009054
	HOG0009166
	HOG0009251
	HOG0009377
	HOG0009718
	HOG0009782
	HOG0010026
	HOG0010040
	HOG0010194
	HOG0010413
	HOG0010414
	HOG0010416
	HOG0010423
	HOG0010424
	HOG0010426
	HOG0015688
	HOG0017649
	HOG0017650
	HOG0017651
	HOG0017654
	HOG0017662
	HOG0017663
	HOG0017666
	HOG0017669
	HOG0017672
	HOG0017675
	HOG0017677
	HOG0017679
	HOG0017680
	HOG0017681
	HOG0017682
	HOG0017683
	HOG0017685
	HOG0019537
	HOG0019540
	HOG0019542
	HOG0019549
	HOG0019552
	HOG0019553
	HOG0019554
	HOG0019559
	HOG0019561
	HOG0019563
	HOG0019575
	HOG0019578
	HOG0019592
	HOG0019593
	HOG0019594
	HOG0020661
	HOG0020667
	HOG0020672
	HOG0020680
	HOG0020681
	HOG0020682
	HOG0020684
	HOG0020685
	HOG0020694
	HOG0020695
	HOG0020697
	HOG0020699
	HOG0020707
	HOG0020709
	HOG0020712
	HOG0020714
	HOG0020715
	HOG0020716
	HOG0020717
	HOG0020720
	HOG0020726
	HOG0020727
	HOG0020728
	HOG0020730
	HOG0020732
	HOG0020735
	HOG0020737
	HOG0020746
	HOG0020749
	HOG0020750
	HOG0020763
	HOG0020765
	HOG0020766
	HOG0020767
	HOG0020770
	HOG0020772
	HOG0020776
	HOG0021793
	HOG0021794
	HOG0021801
	HOG0021810
	HOG0021816
	HOG0021818
	HOG0021821
	HOG0021822
	HOG0021823
	HOG0021827
	HOG0021829
	HOG0021831
	HOG0021833
	HOG0021837
	HOG0021838
	HOG0021846
	HOG0021849
	HOG0021851
	HOG0021856
	HOG0021859
	HOG0021860
	HOG0021863
	HOG0021865
	HOG0021866
	HOG0021869
	HOG0021872
	HOG0021873
	HOG0021878
	HOG0021879
	HOG0021882
	HOG0021888
	HOG0021892
	HOG0021894
	HOG0021896
	HOG0021897
	HOG0021899
	HOG0021901
	HOG0021904
	HOG0021905
	HOG0021906
	HOG0021908
	HOG0021922
	HOG0021924
	HOG0021925
	HOG0021929
	HOG0021930
	HOG0021932
	HOG0021933
	HOG0021935
	HOG0021939
	HOG0021940
	HOG0021942
	HOG0021944
	HOG0021945
	HOG0021948
	HOG0021949
	HOG0021954
	HOG0021955
	HOG0021956
	HOG0021957
	HOG0021960
	HOG0021962
	HOG0021965
	HOG0021968
	HOG0021975
	HOG0021976
	HOG0021977
	HOG0023039
	HOG0023040
	HOG0023041
	HOG0023042
	HOG0023049
	HOG0023053
	HOG0023055
	HOG0023057
	HOG0023059
	HOG0023062
	HOG0023065
	HOG0023077
	HOG0023078
	HOG0023084
	HOG0023087
	HOG0023090
	HOG0023091
	HOG0023101
	HOG0023108
	HOG0023109
	HOG0023111
	HOG0023112
	HOG0023116
	HOG0023121
	HOG0023132
	HOG0023135
	HOG0023140
	HOG0023141
	HOG0023142
	HOG0023144
	HOG0023145
	HOG0023146
	HOG0023148
	HOG0023149
	HOG0023151
	HOG0023155
	HOG0023157
	HOG0023159
	HOG0023160
	HOG0023163
	HOG0023167
	HOG0023168
	HOG0023172
	HOG0023175
	HOG0023176
	HOG0023177
	HOG0023178
	HOG0023182
	HOG0023187
	HOG0023188
	HOG0023189
	HOG0023191
	HOG0023195
	HOG0023196
	HOG0023208
	HOG0023209
	HOG0023219
	HOG0023220
	HOG0023222
	HOG0023226
	HOG0023227
	HOG0023232
	HOG0023234
	HOG0023237
	HOG0023240
	HOG0023242
	HOG0023246
	HOG0023247
	HOG0023248
	HOG0023249
	HOG0023254
	HOG0023258
	HOG0023260
	HOG0023267
	HOG0023268
	HOG0023274
	HOG0023275
	HOG0023282
	HOG0023287
	HOG0023288
	HOG0023289
	HOG0023292
	HOG0023293
	HOG0023296
	HOG0023297
	HOG0023298
	HOG0023299
	HOG0023302
	HOG0023304
	HOG0023308
	HOG0023313
	HOG0023317
	HOG0023319
	HOG0023320
	HOG0023322
	HOG0023323
	HOG0023324
	HOG0023326
	HOG0023331
	HOG0023336
	HOG0023338
	HOG0023339
	HOG0023341
	HOG0023342
	HOG0023344
	HOG0023348
	HOG0023350
	HOG0023352
	HOG0023355
	HOG0023357
	HOG0023362
	HOG0023363
	HOG0023364
	HOG0023365
	HOG0023368
	HOG0023369
	HOG0023371
	HOG0023373
	HOG0023378
	HOG0023382
	HOG0023383
	HOG0023384
	HOG0023387
	HOG0023388
	HOG0024738
	HOG0024739
	HOG0024741
	HOG0024742
	HOG0024745
	HOG0024746
	HOG0024750
	HOG0024758
	HOG0024760
	HOG0024762
	HOG0024765
	HOG0024770
	HOG0024771
	HOG0024773
	HOG0024778
	HOG0024779
	HOG0024784
	HOG0024789
	HOG0024792
	HOG0024793
	HOG0024797
	HOG0024798
	HOG0024802
	HOG0024806
	HOG0024807
	HOG0024808
	HOG0024823
	HOG0024826
	HOG0024832
	HOG0024834
	HOG0024836
	HOG0024839
	HOG0024846
	HOG0024850
	HOG0024852
	HOG0024859
	HOG0024863
	HOG0024865
	HOG0024868
	HOG0024872
	HOG0024873
	HOG0024876
	HOG0024879
	HOG0024885
	HOG0024887
	HOG0024895
	HOG0024896
	HOG0024900
	HOG0024901
	HOG0024911
	HOG0024913
	HOG0024914
	HOG0024918
	HOG0024923
	HOG0024924
	HOG0024926
	HOG0024931
	HOG0024936
	HOG0024938
	HOG0024944
	HOG0024947
	HOG0024948
	HOG0024951
	HOG0024952
	HOG0024959
	HOG0024967
	HOG0024968
	HOG0024969
	HOG0024970
	HOG0024971
	HOG0024972
	HOG0024980
	HOG0024989
	HOG0024994
	HOG0024998
	HOG0025002
	HOG0025009
	HOG0025010
	HOG0025011
	HOG0025013
	HOG0025025
	HOG0025027
	HOG0025032
	HOG0025033
	HOG0025035
	HOG0025037
	HOG0025039
	HOG0025044
	HOG0025046
	HOG0025048
	HOG0025054
	HOG0025055
	HOG0025056
	HOG0025058
	HOG0025065
	HOG0025071
	HOG0025073
	HOG0025079
	HOG0025081
	HOG0025087
	HOG0025089
	HOG0025092
	HOG0025094
	HOG0025098
	HOG0025104
	HOG0025110
	HOG0025113
	HOG0025115
	HOG0025119
	HOG0025121
	HOG0025125
	HOG0025128
	HOG0025134
	HOG0025136
	HOG0025137
	HOG0025144
	HOG0025147
	HOG0025154
	HOG0025159
	HOG0025161
	HOG0025162
	HOG0025165
	HOG0025166
	HOG0025171
	HOG0025172
	HOG0025173
	HOG0025174
	HOG0025175
	HOG0025180
	HOG0025191
	HOG0025192
	HOG0025194
	HOG0025196
	HOG0025197
	HOG0025199
	HOG0025206
	HOG0025207
	HOG0025208
	HOG0025214
	HOG0025216
	HOG0025217
	HOG0025219
	HOG0025224
	HOG0025228
	HOG0025231
	HOG0025235
	HOG0025239
	HOG0025241
	HOG0025245
	HOG0025247
	HOG0025255
	HOG0025256
	HOG0025257
	HOG0025258
	HOG0025264
	HOG0025274
	HOG0025276
	HOG0025278
	HOG0025280
	HOG0025284
	HOG0025291
	HOG0025293
	HOG0025300
	HOG0025302
	HOG0025303
	HOG0025304
	HOG0025312
	HOG0025316
	HOG0025318
	HOG0025319
	HOG0025320
	HOG0025325
	HOG0025327
	HOG0025330
	HOG0025331
	HOG0025337
	HOG0025339
	HOG0025343
	HOG0025344
	HOG0025353
	HOG0025354
	HOG0025364
	HOG0025367
	HOG0025377
	HOG0025378
	HOG0025382
	HOG0025383
	HOG0025389
	HOG0025390
	HOG0025392
	HOG0025393
	HOG0025394
	HOG0025396
	HOG0025401
	HOG0025402
	HOG0025409
	HOG0025411
	HOG0025414
	HOG0025420
	HOG0025423
	HOG0025424
	HOG0025426
	HOG0025427
	HOG0025430
	HOG0025433
	HOG0025434
	HOG0025436
	HOG0025439
	HOG0025443
	HOG0025447
	HOG0025450
	HOG0025451
	HOG0025457
	HOG0025460
	HOG0025462
	HOG0025463
	HOG0025465
	HOG0025469
	HOG0025471
	HOG0025481
	HOG0025482
	HOG0025487
	HOG0025496
	HOG0025497
	HOG0025502
	HOG0025507
	HOG0025508
	HOG0025512
	HOG0025514
	HOG0025516
	HOG0025518
	HOG0025519
	HOG0025527
	HOG0025529
	HOG0025530
	HOG0025532
	HOG0025534
	HOG0025535
	HOG0025544
	HOG0025552
	HOG0025553
	HOG0025555
	HOG0025559
	HOG0025560
	HOG0025561
	HOG0025568
	HOG0025569
	HOG0025570
	HOG0025573
	HOG0025574
	HOG0025576
	HOG0025577
	HOG0025585
	HOG0025595
	HOG0025605
	HOG0025606
	HOG0025608
	HOG0025611
	HOG0025615
	HOG0025616
	HOG0025617
	HOG0025629
	HOG0025630
	HOG0025631
	HOG0025636
	HOG0025637
	HOG0025638
	HOG0025646
	HOG0025647
	HOG0025649
	HOG0025651
	HOG0025659
	HOG0025668
	HOG0025674
	HOG0025675
	HOG0025676
	HOG0025678
	HOG0025681
	HOG0025683
	HOG0025684
	HOG0025685
	HOG0025686
	HOG0025687
	HOG0025688
	HOG0025693
	HOG0025694
	HOG0025695
	HOG0025696
	HOG0025700
	HOG0025701
	HOG0025710
	HOG0025711
	HOG0025712
	HOG0025713
	HOG0025714
	HOG0025715
	HOG0025721
	HOG0025723
	HOG0025724
	HOG0025725
	HOG0025731
	HOG0025733
	HOG0025742
	HOG0025745
	HOG0025747
	HOG0025748
	HOG0025755
	HOG0025760
	HOG0025761
	HOG0025765
Common to Montipora and Astreopora	HOG0000387
	HOG0000469
	HOG0000483
	HOG0000648
	HOG0000665
	HOG0000703
	HOG0000858
	HOG0000920
	HOG0001133
	HOG0001250
	HOG0001251
	HOG0001471
	HOG0001522
	HOG0001649
	HOG0001832
	HOG0001835
	HOG0001875
	HOG0002011
	HOG0002118
	HOG0002141
	HOG0002165
	HOG0002188
	HOG0002370
	HOG0002443
	HOG0002528
	HOG0002593
	HOG0002632
	HOG0002809
	HOG0002850
	HOG0003070
	HOG0003103
	HOG0003144
	HOG0003145
	HOG0003184
	HOG0003185
	HOG0003327
	HOG0003353
	HOG0003452
	HOG0003472
	HOG0003531
	HOG0003572
	HOG0003722
	HOG0003747
	HOG0003810
	HOG0003901
	HOG0003949
	HOG0003952
	HOG0003957
	HOG0004004
	HOG0004011
	HOG0004202
	HOG0004203
	HOG0004204
	HOG0004372
	HOG0004474
	HOG0004518
	HOG0004550
	HOG0004557
	HOG0004558
	HOG0004565
	HOG0004669
	HOG0004759
	HOG0004760
	HOG0004838
	HOG0004883
	HOG0004943
	HOG0004947
	HOG0004952
	HOG0005017
	HOG0005052
	HOG0005053
	HOG0005188
	HOG0005300
	HOG0005310
	HOG0005406
	HOG0005407
	HOG0005411
	HOG0005412
	HOG0005413
	HOG0005570
	HOG0005638
	HOG0005731
	HOG0005764
	HOG0005840
	HOG0005886
	HOG0005907
	HOG0006138
	HOG0006219
	HOG0006247
	HOG0006337
	HOG0006383
	HOG0006442
	HOG0006469
	HOG0006480
	HOG0006485
	HOG0006524
	HOG0006632
	HOG0006635
	HOG0006657
	HOG0006706
	HOG0006729
	HOG0006961
	HOG0007045
	HOG0007149
	HOG0007194
	HOG0007201
	HOG0007342
	HOG0007497
	HOG0007723
	HOG0007759
	HOG0007863
	HOG0007865
	HOG0007866
	HOG0007874
	HOG0007888
	HOG0007906
	HOG0007907
	HOG0007908
	HOG0007914
	HOG0007916
	HOG0007917
	HOG0007920
	HOG0007926
	HOG0010320
	HOG0010333
	HOG0010339
	HOG0010345
	HOG0010347
	HOG0010354
	HOG0010363
	HOG0010396
	HOG0017575
	HOG0017580
	HOG0017581
	HOG0017584
	HOG0017586
	HOG0017593
	HOG0017612
	HOG0017615
	HOG0017616
	HOG0017621
	HOG0017627
	HOG0017630
	HOG0017638
	HOG0019362
	HOG0019365
	HOG0019372
	HOG0019378
	HOG0019394
	HOG0019402
	HOG0019417
	HOG0019419
	HOG0019421
	HOG0019423
	HOG0019424
	HOG0019441
	HOG0019443
	HOG0019444
	HOG0019456
	HOG0019459
	HOG0019482
	HOG0019490
	HOG0019491
	HOG0019493
	HOG0019495
	HOG0019503
	HOG0019504
	HOG0019505
	HOG0019506
	HOG0019507
	HOG0020462
	HOG0020479
	HOG0020496
	HOG0020506
	HOG0020519
	HOG0020520
	HOG0020522
	HOG0020529
	HOG0020532
	HOG0020537
	HOG0020558
	HOG0020559
	HOG0020567
	HOG0020568
	HOG0020584
	HOG0020594
	HOG0020598
	HOG0020610
	HOG0020613
	HOG0020618
	HOG0020621
	HOG0020624
	HOG0020630
	HOG0020632
	HOG0020634
	HOG0021417
	HOG0021418
	HOG0021419
	HOG0021421
	HOG0021422
	HOG0021426
	HOG0021430
	HOG0021436
	HOG0021438
	HOG0021439
	HOG0021445
	HOG0021447
	HOG0021451
	HOG0021452
	HOG0021459
	HOG0021473
	HOG0021480
	HOG0021487
	HOG0021488
	HOG0021489
	HOG0021490
	HOG0021491
	HOG0021496
	HOG0021497
	HOG0021500
	HOG0021502
	HOG0021505
	HOG0021506
	HOG0021509
	HOG0021512
	HOG0021514
	HOG0021515
	HOG0021526
	HOG0021537
	HOG0021540
	HOG0021547
	HOG0021556
	HOG0021557
	HOG0021558
	HOG0021561
	HOG0021568
	HOG0021569
	HOG0021571
	HOG0021576
	HOG0021578
	HOG0021583
	HOG0021591
	HOG0021605
	HOG0021606
	HOG0021607
	HOG0021608
	HOG0021610
	HOG0021612
	HOG0021619
	HOG0021620
	HOG0021621
	HOG0021622
	HOG0021626
	HOG0021633
	HOG0021636
	HOG0021640
	HOG0021641
	HOG0021642
	HOG0021644
	HOG0021649
	HOG0021652
	HOG0021659
	HOG0021660
	HOG0021664
	HOG0021665
	HOG0021666
	HOG0021668
	HOG0021675
	HOG0021678
	HOG0021680
	HOG0021687
	HOG0021689
	HOG0021693
	HOG0021694
	HOG0021697
	HOG0021699
	HOG0021701
	HOG0021702
	HOG0021705
	HOG0021706
	HOG0021707
	HOG0021712
	HOG0021715
	HOG0021716
	HOG0021718
	HOG0021719
	HOG0021723
	HOG0021725
	HOG0021726
	HOG0021727
	HOG0021728
	HOG0021730
	HOG0021731
	HOG0021735
	HOG0021738
	HOG0021739
	HOG0021741
	HOG0021742
	HOG0021743
	HOG0022622
	HOG0022625
	HOG0022643
	HOG0022654
	HOG0022685
	HOG0022696
	HOG0022708
	HOG0022718
	HOG0022722
	HOG0022724
	HOG0022734
	HOG0022736
	HOG0022739
	HOG0022754
	HOG0022756
	HOG0022760
	HOG0022789
	HOG0022798
	HOG0022799
	HOG0022802
	HOG0022803
	HOG0022810
	HOG0022811
	HOG0022812
	HOG0022836
	HOG0022837
	HOG0022840
	HOG0022854
	HOG0022861
	HOG0022862
	HOG0022880
	HOG0022882
	HOG0022883
	HOG0022886
	HOG0022889
	HOG0022892
	HOG0022899
	HOG0022902
	HOG0022916
	HOG0022924
	HOG0022930
	HOG0022932
	HOG0022936
	HOG0022939
	HOG0022940
