# Supplementary material for: Comparative genomics highlight the importance of lineage-specific gene families in evolutionary divergence of the coral genus, Montipora
Source: BMC Ecol Evol. 2022 May 27;22:71. doi: 10.1186/s12862-022-02023-8 (PMC9145168; doi:10.1186/s12862-022-02023-8)
Supplement: Supplementary file 3 — Additional file 3: Table S3. IDs of gene families common to three genera (Montipora, Acropora and Astreopora) or common to Montipora and Acropora, that are expressed during three life stages (planula larvae, metamorphosed larvae, and recruits). [file 12862_2022_2023_MOESM3_ESM.xlsx]

## Sheet: Table S3
Gene family group	Gene family ID
Common to the three genera	HOG0001700
	HOG0001890
	HOG0002964
	HOG0003019
	HOG0004431
	HOG0004601
	HOG0006125
	HOG0007287
	HOG0008624
	HOG0008682
	HOG0011067
	HOG0011594
	HOG0012062
	HOG0013836
	HOG0013950
	HOG0015344
	HOG0015371
	HOG0016885
	HOG0017225
	HOG0018266
	HOG0018347
	HOG0018995
Common to Montipor and Acropora	HOG0003889
	HOG0004593
	HOG0005676
	HOG0006091
	HOG0007628
	HOG0009079
	HOG0011498
	HOG0011586
	HOG0011894
	HOG0013164
	HOG0018404
	HOG0020083
	HOG0020167
