# Supplementary material for: Comparative genomics highlight the importance of lineage-specific gene families in evolutionary divergence of the coral genus, Montipora
Source: BMC Ecol Evol. 2022 May 27;22:71. doi: 10.1186/s12862-022-02023-8 (PMC9145168; doi:10.1186/s12862-022-02023-8)
Supplement: Supplementary file 4 — Additional file 4: Table S4. Summary of gene families significantly (Fisher’s exact test: p < 0.05) expanded in the Montipora genome compared to those of Acropora or Astreopora. [file 12862_2022_2023_MOESM4_ESM.xlsx]

## Sheet: Table S4
Gene family ID	Gene ID	SwissProt annotation (BLASTP, e-value cutoff: 1e-5)	Pfam domain (InterProScan, e-value cutoff: 1e-3)
HOG0002487	meff_s0025.g0062	Short transient receptor potential channel 2 homolog	NA
	meff_s0025.g0064	Transient receptor potential cation channel subfamily M member 8	NA
	meff_s0025.g0066	Short transient receptor potential channel 2 homolog	NA
	meff_s0025.g0067	NA	NA
	meff_s0074.g0043	Transient receptor potential protein	NA
	meff_s0074.g0045	NA	NA
	meff_s0120.g0057	Short transient receptor potential channel 6	NA
	meff_s0546.g0007	Transient receptor potential protein	NA
HOG0001797	meff_s0270.g0010	NA	NA
	meff_s0164.g0003	NA	NA
	meff_s1497.g0001	NA	NA
	meff_s0412.g0006	NA	NA
	meff_s0074.g0011	NA	NA
	meff_s0052.g0025	NA	NA
	meff_s0059.g0020	Protein DBF4 homolog B	DBF zinc finger (PF07535)
	meff_s0370.g0017	NA	NA
	meff_s0456.g0015	NA	NA
	meff_s0101.g0100	NA	NA
	meff_s0015.g0063	NA	NA
HOG0003259	meff_s0584.g0005	NA	Collagen triple helix repeat (PF01391)
	meff_s0584.g0003	Collagen alpha-2(IV) chain	Collagen triple helix repeat (PF01391)
	meff_s0038.g0069	Collagen alpha-1(VII) chain	Collagen triple helix repeat (PF01391)
	meff_s0584.g0001	Collagen alpha-1(VII) chain	Collagen triple helix repeat (PF01391)
	meff_s0038.g0071	Collagen alpha-2(I) chain	NA
	meff_s0569.g0006	NA	NA
	meff_s0569.g0007	NA	NA
	meff_s1159.g0001	NA	NA
HOG0000387	meff_s0102.g0004	Tetratricopeptide repeat protein 28	Tetratricopeptide repeat (PF13176) Tetratricopeptide repeat (PF13424)
	meff_s0104.g0024	Tetratricopeptide repeat protein 28	CHAT domain (PF12770)
	meff_s0170.g0002	Tetratricopeptide repeat protein 28	Tetratricopeptide repeat (PF13424) CHAT domain (PF12770)
	meff_s0170.g0003	G-protein-signaling modulator 1	Tetratricopeptide repeat (PF13424)
	meff_s0272.g0024	Tetratricopeptide repeat protein 28	CHAT domain (PF12770)
	meff_s0272.g0025	NA	NA
	meff_s0272.g0027	G-protein-signaling modulator 2	Tetratricopeptide repeat (PF13424)
	meff_s0279.g0004	Tetratricopeptide repeat protein 28	Tetratricopeptide repeat (PF13176) Tetratricopeptide repeat (PF13424) CHAT domain (PF12770)
	meff_s0308.g0011	Tetratricopeptide repeat protein 28	Tetratricopeptide repeat (PF13424) CHAT domain (PF12770)
	meff_s0404.g0023	Tetratricopeptide repeat protein 28	Tetratricopeptide repeat (PF13424) CHAT domain (PF12770)
	meff_s0525.g0001	Tetratricopeptide repeat protein 28	CHAT domain (PF12770)
	meff_s0601.g0002	Tetratricopeptide repeat protein 28	Tetratricopeptide repeat (PF13424) CHAT domain (PF12770)
	meff_s1047.g0003	Tetratricopeptide repeat protein 28	Tetratricopeptide repeat (PF13176) Tetratricopeptide repeat (PF13424) CHAT domain (PF12770)
