# Supplementary material for: Comparative genomics highlight the importance of lineage-specific gene families in evolutionary divergence of the coral genus, Montipora
Source: BMC Ecol Evol. 2022 May 27;22:71. doi: 10.1186/s12862-022-02023-8 (PMC9145168; doi:10.1186/s12862-022-02023-8)
Supplement: Supplementary file 5 — Additional file 5: Table S5. Summary of samples used for RNA-seq. [file 12862_2022_2023_MOESM5_ESM.xlsx]

## Sheet: Table S5
Species	Sample stage	Library preparation kit	Sequencer	Read length	BioProject accession no.	Run accession no.
Montipora cactus	Adult	TsuSeq Stranded mRNA Library Kit (Illumina)	NovaSeq 6000	100-bp paired-end	PRJDB11460	DRR286407
	Sperm	Kapa RNA HyperPrep Kit (Kapa Biosystems)	NovaSeq 6000	150-bp paired-end	PRJDB11460	DRR286413
		MGIEasy RNA Directional Library Prep Set (MGI)	DNBSEQ-G400RS	100-bp paired-end	PRJDB11460	DRR286409
Montipora efflorescens	Adult	TsuSeq Stranded mRNA Library Kit (Illumina)	NovaSeq 6000	100-bp paired-end	PRJDB11460	DRR286410
	Egg	Kapa RNA HyperPrep Kit (Kapa Biosystems)	NovaSeq 6000	150-bp paired-end	PRJDB11460	DRR286414
		MGIEasy RNA Directional Library Prep Set (MGI)	DNBSEQ-G400RS	100-bp paired-end	PRJDB11460	DRR286411
	Pnalula larvae (1dpf)	Kapa RNA HyperPrep Kit (Kapa Biosystems)	NovaSeq 6000	150-bp paired-end	PRJDB11460	DRR286415
		MGIEasy RNA Directional Library Prep Set (MGI)	DNBSEQ-G400RS	100-bp paired-end	PRJDB11460	DRR286412
	Pnalula larvae (4dpf)	Kapa RNA HyperPrep Kit (Kapa Biosystems)	NovaSeq 6000	150-bp paired-end	PRJDB11460	DRR286416
		MGIEasy RNA Directional Library Prep Set (MGI)	DNBSEQ-G400RS	100-bp paired-end	PRJDB11460	DRR286408
Astreopora myriophthalma	Adult	TsuSeq Stranded mRNA Library Kit (Illumina)	NovaSeq 6000	100-bp paired-end	PRJDB11460	DRR286406
