# Supplementary material for: Comparative genomics highlight the importance of lineage-specific gene families in evolutionary divergence of the coral genus, Montipora
Source: BMC Ecol Evol. 2022 May 27;22:71. doi: 10.1186/s12862-022-02023-8 (PMC9145168; doi:10.1186/s12862-022-02023-8)
Supplement: Supplementary file 6 — Additional file 6: Table S6. Summary of publicly available RNA-seq samples that were included for gene prediction in Montipora and Astreopora. [file 12862_2022_2023_MOESM6_ESM.xlsx]

## Sheet: Table S6
Species	Sample stage	BioProject accession number	Used for gene prediction of	Run accession number
Montipora capitata	Adult	PRJNA509219	Montipora	SRR8497576
				SRR8497578
				SRR8497579
				SRR8497580
				SRR8497581
				SRR8497582
				SRR8497583
				SRR8497584
				SRR8497585
				SRR8497586
				SRR8497587
				SRR8497588
				SRR8497589
				SRR8497590
				SRR8497591
				SRR8497592
				SRR8497593
				SRR8497594
				SRR8497595
				SRR8497596
				SRR8497597
Astreopora expansa	Adult	PRJNA512601	Astreopora	SRR8386736
