# Supplementary material for: Comparative genomics highlight the importance of lineage-specific gene families in evolutionary divergence of the coral genus, Montipora
Source: BMC Ecol Evol. 2022 May 27;22:71. doi: 10.1186/s12862-022-02023-8 (PMC9145168; doi:10.1186/s12862-022-02023-8)
Supplement: Supplementary file 7 — Additional file 7: Table S7. Summary of RNA-seq samples used for comparative transcriptomic analyses. [file 12862_2022_2023_MOESM7_ESM.xlsx]

## Sheet: Table S7
Species	BioProject accession no.	Sample stage	Run accession no.	No. of read (raw-data)	Total base (raw-data)	No. of read (after quality trimming)	Total bases (after quality trimming)	Mapping rate
Montipora capitata	PRJNA738963	Recruit	SRR14864064	49259211	14,776 Mb	48288153	13,700 Mb	0.423037
			SRR14864065	41742625	12,522 Mb	41586776	12,063 Mb	0.435678
			SRR14864066	44802304	13,440 Mb	44722141	11,990 Mb	0.325159
		Metamorphosed larva	SRR14864067	41148636	12,344 Mb	41098165	12,051 Mb	0.572906
			SRR14864068	34909249	10,472 Mb	34869527	10,236 Mb	0.563381
			SRR14864069	36286952	10,886 Mb	36242374	10,622 Mb	0.629502
		Planula larva (7 dpf)	SRR14864070	36440630	10,932 Mb	36379287	10,634 Mb	0.638737
			SRR14864071	39106593	11,730 Mb	39043192	11,265 Mb	0.631876
			SRR14864072	36124077	10,836 Mb	6580611	1,858 Mb	0.569976
Montipora efflorescens	PRJDB11460	Planula larva (1 dpf)	DRR286415	12368218	2,472 Mb	12355265	2,463 Mb	0.576331
		Planula larva (4 dpf)	DRR286416	12622691	2,524 Mb	12612081	2,513 Mb	0.654502
Acropora digitifera	PRJDB11460	Embryo (Prawn chip)	DRR286422	28391977	5,678 Mb	27720648	5,373 Mb	0.895755
		Gastrula	DRR286418	32000000	6,400 Mb	31430465	6,088 Mb	0.873196
		Planula larvae	DRR286420	32000000	6,400 Mb	31382060	6,085 Mb	0.850888
		Polyp	DRR286421	32000000	6,400 Mb	31437701	6,087 Mb	0.851662
Acropora tenuis	PRJDB11460	Embryo (Prawn chip)	DRR286428	16815693	4,472 Mb	16782964	4,278 Mb	0.806869
		Gastrula	DRR286424	21148998	5624 Mb	21119881	5,405 Mb	0.828517
		Pre planula larvae	DRR286429	32397083	8,616 Mb	32309087	8,260 Mb	0.821783
		Planula larvae	DRR286426	20620939	5,484 Mb	20578392	5,187 Mb	0.816462
		Polyp	DRR286427	21277687	5,658 Mb	21221399	5,419 Mb	0.797416
