# Supplementary material for: Comparative genomics highlight the importance of lineage-specific gene families in evolutionary divergence of the coral genus, Montipora
Source: BMC Ecol Evol. 2022 May 27;22:71. doi: 10.1186/s12862-022-02023-8 (PMC9145168; doi:10.1186/s12862-022-02023-8)
Supplement: Supplementary file 10 — Additional file 10: Data S2. Summary of retained scaffolds after genome assembly curation for Montipora cactus and M. efflorescens. [file 12862_2022_2023_MOESM10_ESM.xlsx]

## Sheet: M. cactus
Scaffold ID	Accession no.
sc0000001	BLFO01001552
sc0000002	BLFO01000948
sc0000003	BLFO01001586
sc0000004	BLFO01003686
sc0000005	BLFO01000132
sc0000006	BLFO01004178
sc0000007	BLFO01003932
sc0000008	BLFO01001798
sc0000009	BLFO01002457
sc0000010	BLFO01004608
sc0000011	BLFO01000009
sc0000012	BLFO01003884
sc0000013	BLFO01004398
sc0000014	BLFO01000089
sc0000015	BLFO01004098
sc0000016	BLFO01004110
sc0000017	BLFO01003516
sc0000018	BLFO01002310
sc0000019	BLFO01001392
sc0000020	BLFO01002021
sc0000021	BLFO01001177
sc0000022	BLFO01002104
sc0000023	BLFO01001481
sc0000024	BLFO01001272
sc0000025	BLFO01000647
sc0000026	BLFO01000097
sc0000027	BLFO01003992
sc0000028	BLFO01003660
sc0000029	BLFO01002435
sc0000030	BLFO01002203
sc0000031	BLFO01002648
sc0000032	BLFO01003574
sc0000033	BLFO01004347
sc0000034	BLFO01002170
sc0000035	BLFO01002780
sc0000036	BLFO01003738
sc0000037	BLFO01004336
sc0000038	BLFO01004757
sc0000039	BLFO01000483
sc0000040	BLFO01004141
sc0000041	BLFO01004000
sc0000042	BLFO01003372
sc0000043	BLFO01003944
sc0000044	BLFO01001874
sc0000045	BLFO01003016
sc0000046	BLFO01000896
sc0000047	BLFO01001513
sc0000048	BLFO01002784
sc0000049	BLFO01002157
sc0000050	BLFO01001472
sc0000051	BLFO01000791
sc0000052	BLFO01002695
sc0000053	BLFO01001972
sc0000054	BLFO01004860
sc0000055	BLFO01000837
sc0000056	BLFO01001213
sc0000057	BLFO01000439
sc0000058	BLFO01002359
sc0000059	BLFO01001581
sc0000060	BLFO01001193
sc0000061	BLFO01000416
sc0000062	BLFO01003887
sc0000063	BLFO01003074
sc0000064	BLFO01000347
sc0000065	BLFO01004489
sc0000066	BLFO01001520
sc0000067	BLFO01000730
sc0000068	BLFO01001763
sc0000069	BLFO01001291
sc0000070	BLFO01003681
sc0000071	BLFO01004327
sc0000072	BLFO01001170
sc0000073	BLFO01000003
sc0000074	BLFO01002211
sc0000075	BLFO01002775
sc0000076	BLFO01003674
sc0000077	BLFO01004265
sc0000078	BLFO01000155
sc0000079	BLFO01003736
sc0000080	BLFO01000048
sc0000081	BLFO01000234
sc0000082	BLFO01000593
sc0000083	BLFO01001351
sc0000084	BLFO01000031
sc0000085	BLFO01004671
sc0000086	BLFO01002880
sc0000087	BLFO01003671
sc0000088	BLFO01001708
sc0000089	BLFO01002248
sc0000090	BLFO01000485
sc0000091	BLFO01001295
sc0000092	BLFO01003357
sc0000093	BLFO01003432
sc0000094	BLFO01000215
sc0000095	BLFO01004784
sc0000096	BLFO01002057
sc0000097	BLFO01003995
sc0000098	BLFO01002512
sc0000099	BLFO01001760
sc0000100	BLFO01002754
sc0000101	BLFO01004082
sc0000102	BLFO01000660
sc0000103	BLFO01003181
sc0000104	BLFO01004828
sc0000105	BLFO01002334
sc0000106	BLFO01004309
sc0000107	BLFO01001599
sc0000108	BLFO01000076
sc0000109	BLFO01004912
sc0000110	BLFO01000947
sc0000111	BLFO01004361
sc0000112	BLFO01003570
sc0000113	BLFO01004752
sc0000114	BLFO01002124
sc0000115	BLFO01000589
sc0000116	BLFO01004562
sc0000117	BLFO01002990
sc0000118	BLFO01002236
sc0000119	BLFO01003573
sc0000120	BLFO01001178
sc0000121	BLFO01000310
sc0000122	BLFO01000713
sc0000123	BLFO01001819
sc0000124	BLFO01002228
sc0000125	BLFO01003242
sc0000126	BLFO01004051
sc0000127	BLFO01003236
sc0000128	BLFO01003813
sc0000129	BLFO01002938
sc0000130	BLFO01002072
sc0000131	BLFO01004503
sc0000132	BLFO01001125
sc0000133	BLFO01000836
sc0000134	BLFO01002909
sc0000135	BLFO01004179
sc0000136	BLFO01003535
sc0000137	BLFO01003170
sc0000138	BLFO01004842
sc0000139	BLFO01000360
sc0000140	BLFO01004352
sc0000141	BLFO01004550
sc0000142	BLFO01000106
sc0000143	BLFO01000856
sc0000144	BLFO01000601
sc0000145	BLFO01001357
sc0000146	BLFO01001751
sc0000147	BLFO01004074
sc0000148	BLFO01000008
sc0000149	BLFO01004622
sc0000150	BLFO01002541
sc0000151	BLFO01000962
sc0000152	BLFO01000105
sc0000153	BLFO01003976
sc0000154	BLFO01003337
sc0000155	BLFO01002441
sc0000156	BLFO01001824
sc0000157	BLFO01001579
sc0000158	BLFO01000975
sc0000159	BLFO01001587
sc0000160	BLFO01000898
sc0000161	BLFO01000627
sc0000162	BLFO01002514
sc0000163	BLFO01004070
sc0000164	BLFO01003269
sc0000165	BLFO01000231
sc0000166	BLFO01003873
sc0000167	BLFO01004680
sc0000168	BLFO01000057
sc0000169	BLFO01001219
sc0000170	BLFO01004855
sc0000171	BLFO01004831
sc0000172	BLFO01004874
sc0000173	BLFO01001094
sc0000174	BLFO01000575
sc0000175	BLFO01002934
sc0000176	BLFO01001758
sc0000177	BLFO01004152
sc0000178	BLFO01003600
sc0000179	BLFO01004175
sc0000180	BLFO01002304
sc0000181	BLFO01003071
sc0000182	BLFO01003463
sc0000183	BLFO01003420
sc0000184	BLFO01004205
sc0000185	BLFO01000936
sc0000186	BLFO01004795
sc0000187	BLFO01003705
sc0000188	BLFO01004221
sc0000189	BLFO01001233
sc0000190	BLFO01003962
sc0000191	BLFO01000198
sc0000192	BLFO01002542
sc0000193	BLFO01003116
sc0000194	BLFO01004718
sc0000195	BLFO01001879
sc0000196	BLFO01004323
sc0000197	BLFO01001000
sc0000198	BLFO01002800
sc0000199	BLFO01001220
sc0000200	BLFO01000888
sc0000201	BLFO01001435
sc0000202	BLFO01004242
sc0000203	BLFO01003394
sc0000204	BLFO01004843
sc0000205	BLFO01000694
sc0000206	BLFO01000082
sc0000207	BLFO01000927
sc0000208	BLFO01000648
sc0000209	BLFO01002439
sc0000210	BLFO01002761
sc0000211	BLFO01002182
sc0000212	BLFO01004261
sc0000213	BLFO01003663
sc0000214	BLFO01004577
sc0000215	BLFO01001684
sc0000216	BLFO01001246
sc0000217	BLFO01001514
sc0000218	BLFO01000971
sc0000219	BLFO01003033
sc0000220	BLFO01003598
sc0000221	BLFO01003941
sc0000222	BLFO01003410
sc0000223	BLFO01002699
sc0000224	BLFO01002033
sc0000225	BLFO01001297
sc0000226	BLFO01004619
sc0000227	BLFO01000007
sc0000228	BLFO01002421
sc0000229	BLFO01004109
sc0000230	BLFO01003443
sc0000231	BLFO01004255
sc0000232	BLFO01002307
sc0000233	BLFO01003003
sc0000234	BLFO01003031
sc0000235	BLFO01000516
sc0000236	BLFO01001280
sc0000237	BLFO01000518
sc0000238	BLFO01001717
sc0000239	BLFO01004705
sc0000240	BLFO01002579
sc0000241	BLFO01001792
sc0000242	BLFO01001638
sc0000243	BLFO01002395
sc0000244	BLFO01000468
sc0000245	BLFO01001226
sc0000246	BLFO01003982
sc0000247	BLFO01002201
sc0000248	BLFO01002804
sc0000249	BLFO01003539
sc0000250	BLFO01000830
sc0000251	BLFO01001463
sc0000252	BLFO01004558
sc0000253	BLFO01000237
sc0000254	BLFO01002896
sc0000255	BLFO01003119
sc0000256	BLFO01001380
sc0000257	BLFO01001969
sc0000258	BLFO01000738
sc0000259	BLFO01004739
sc0000260	BLFO01001766
sc0000261	BLFO01002284
sc0000262	BLFO01001553
sc0000263	BLFO01000770
sc0000264	BLFO01002492
sc0000265	BLFO01001856
sc0000266	BLFO01004012
sc0000267	BLFO01004112
sc0000268	BLFO01000781
sc0000269	BLFO01000216
sc0000270	BLFO01002469
sc0000271	BLFO01001890
sc0000272	BLFO01004035
sc0000273	BLFO01003276
sc0000274	BLFO01000223
sc0000275	BLFO01003378
sc0000276	BLFO01001745
sc0000277	BLFO01000928
sc0000278	BLFO01003239
sc0000279	BLFO01002536
sc0000280	BLFO01002389
sc0000281	BLFO01001397
sc0000282	BLFO01002957
sc0000283	BLFO01001011
sc0000284	BLFO01004028
sc0000285	BLFO01002089
sc0000286	BLFO01001299
sc0000287	BLFO01004774
sc0000288	BLFO01001672
sc0000289	BLFO01001188
sc0000290	BLFO01004395
sc0000291	BLFO01002161
sc0000292	BLFO01004649
sc0000293	BLFO01003692
sc0000294	BLFO01001379
sc0000295	BLFO01000166
sc0000296	BLFO01002221
sc0000297	BLFO01002789
sc0000298	BLFO01002210
sc0000299	BLFO01002777
sc0000300	BLFO01003350
sc0000301	BLFO01000469
sc0000302	BLFO01000992
sc0000303	BLFO01000683
sc0000304	BLFO01004612
sc0000305	BLFO01003511
sc0000306	BLFO01004075
sc0000307	BLFO01002335
sc0000308	BLFO01003001
sc0000309	BLFO01002226
sc0000310	BLFO01003897
sc0000311	BLFO01004125
sc0000312	BLFO01004553
sc0000313	BLFO01000806
sc0000314	BLFO01001421
sc0000315	BLFO01002121
sc0000316	BLFO01002864
sc0000317	BLFO01002117
sc0000318	BLFO01002873
sc0000319	BLFO01003921
sc0000320	BLFO01001548
sc0000321	BLFO01000236
sc0000322	BLFO01003506
sc0000323	BLFO01001399
sc0000324	BLFO01002256
sc0000325	BLFO01001990
sc0000326	BLFO01002733
sc0000327	BLFO01003083
sc0000328	BLFO01003864
sc0000329	BLFO01003398
sc0000330	BLFO01003424
sc0000331	BLFO01000682
sc0000332	BLFO01001258
sc0000333	BLFO01001420
sc0000334	BLFO01004851
sc0000335	BLFO01004111
sc0000336	BLFO01003851
sc0000337	BLFO01003743
sc0000338	BLFO01003831
sc0000339	BLFO01001876
sc0000340	BLFO01001729
sc0000341	BLFO01000586
sc0000342	BLFO01001148
sc0000343	BLFO01004164
sc0000344	BLFO01002850
sc0000345	BLFO01003401
sc0000346	BLFO01004243
sc0000347	BLFO01002316
sc0000348	BLFO01003069
sc0000349	BLFO01000458
sc0000350	BLFO01000620
sc0000351	BLFO01003933
sc0000352	BLFO01001842
sc0000353	BLFO01003386
sc0000354	BLFO01003947
sc0000355	BLFO01003565
sc0000356	BLFO01000127
sc0000357	BLFO01001582
sc0000358	BLFO01003444
sc0000359	BLFO01001836
sc0000360	BLFO01001865
sc0000361	BLFO01004595
sc0000362	BLFO01003082
sc0000363	BLFO01001454
sc0000364	BLFO01004439
sc0000365	BLFO01001975
sc0000366	BLFO01002735
sc0000367	BLFO01003109
sc0000368	BLFO01003847
sc0000369	BLFO01003697
sc0000370	BLFO01000379
sc0000371	BLFO01004747
sc0000372	BLFO01002487
sc0000373	BLFO01004157
sc0000374	BLFO01003517
sc0000375	BLFO01002904
sc0000376	BLFO01002324
sc0000377	BLFO01000922
sc0000378	BLFO01001694
sc0000379	BLFO01003191
sc0000380	BLFO01000714
sc0000381	BLFO01000049
sc0000382	BLFO01004626
sc0000383	BLFO01004199
sc0000384	BLFO01004451
sc0000385	BLFO01002679
sc0000386	BLFO01003402
sc0000387	BLFO01001184
sc0000388	BLFO01002000
sc0000389	BLFO01000989
sc0000390	BLFO01003765
sc0000391	BLFO01001466
sc0000392	BLFO01000876
sc0000393	BLFO01002052
sc0000394	BLFO01001450
sc0000395	BLFO01003133
sc0000396	BLFO01002598
sc0000397	BLFO01004510
sc0000398	BLFO01003139
sc0000399	BLFO01000801
sc0000400	BLFO01001013
sc0000401	BLFO01003815
sc0000402	BLFO01000358
sc0000403	BLFO01004494
sc0000404	BLFO01001554
sc0000405	BLFO01000762
sc0000406	BLFO01002692
sc0000407	BLFO01001896
sc0000408	BLFO01001243
sc0000409	BLFO01000113
sc0000410	BLFO01000096
sc0000411	BLFO01004847
sc0000412	BLFO01003303
sc0000413	BLFO01004130
sc0000414	BLFO01002143
sc0000415	BLFO01003063
sc0000416	BLFO01003482
sc0000417	BLFO01004106
sc0000418	BLFO01002506
sc0000419	BLFO01003035
sc0000420	BLFO01003714
sc0000421	BLFO01004342
sc0000422	BLFO01004461
sc0000423	BLFO01004594
sc0000424	BLFO01001482
sc0000425	BLFO01004445
sc0000426	BLFO01002023
sc0000427	BLFO01000779
sc0000428	BLFO01003882
sc0000429	BLFO01002029
sc0000430	BLFO01003805
sc0000431	BLFO01003113
sc0000432	BLFO01000020
sc0000433	BLFO01004506
sc0000434	BLFO01001568
sc0000435	BLFO01000835
sc0000436	BLFO01002169
sc0000437	BLFO01001349
sc0000438	BLFO01003260
sc0000439	BLFO01002525
sc0000440	BLFO01003282
sc0000441	BLFO01004379
sc0000442	BLFO01000110
sc0000443	BLFO01000961
sc0000444	BLFO01001656
sc0000445	BLFO01002125
sc0000446	BLFO01001929
sc0000447	BLFO01002714
sc0000448	BLFO01002446
sc0000449	BLFO01003687
sc0000450	BLFO01000414
sc0000451	BLFO01001146
sc0000452	BLFO01002596
sc0000453	BLFO01003214
sc0000454	BLFO01003429
sc0000455	BLFO01004135
sc0000456	BLFO01004262
sc0000457	BLFO01003497
sc0000458	BLFO01003160
sc0000459	BLFO01002411
sc0000460	BLFO01002802
sc0000461	BLFO01002378
sc0000462	BLFO01001919
sc0000463	BLFO01003492
sc0000464	BLFO01004604
sc0000465	BLFO01000826
sc0000466	BLFO01001216
sc0000467	BLFO01000470
sc0000468	BLFO01000756
sc0000469	BLFO01003068
sc0000470	BLFO01004654
sc0000471	BLFO01000229
sc0000472	BLFO01001378
sc0000473	BLFO01000442
sc0000474	BLFO01002768
sc0000475	BLFO01002184
sc0000476	BLFO01003041
sc0000477	BLFO01002154
sc0000478	BLFO01003216
sc0000479	BLFO01003640
sc0000480	BLFO01003558
sc0000481	BLFO01004107
sc0000482	BLFO01002353
sc0000483	BLFO01002887
sc0000484	BLFO01001161
sc0000485	BLFO01000030
sc0000486	BLFO01004804
sc0000487	BLFO01003547
sc0000488	BLFO01001073
sc0000489	BLFO01000144
sc0000490	BLFO01002988
sc0000491	BLFO01002403
sc0000492	BLFO01001634
sc0000493	BLFO01003653
sc0000494	BLFO01004881
sc0000495	BLFO01003328
sc0000496	BLFO01002450
sc0000497	BLFO01001727
sc0000498	BLFO01004480
sc0000499	BLFO01000192
sc0000500	BLFO01001776
sc0000501	BLFO01001104
sc0000502	BLFO01000549
sc0000503	BLFO01002910
sc0000504	BLFO01002275
sc0000505	BLFO01000298
sc0000506	BLFO01001344
sc0000507	BLFO01003230
sc0000508	BLFO01004830
sc0000509	BLFO01002346
sc0000510	BLFO01003026
sc0000511	BLFO01001129
sc0000512	BLFO01000542
sc0000513	BLFO01004811
sc0000514	BLFO01004880
sc0000515	BLFO01002162
sc0000516	BLFO01004303
sc0000517	BLFO01000941
sc0000518	BLFO01002510
sc0000519	BLFO01001409
sc0000520	BLFO01004203
sc0000521	BLFO01001752
sc0000522	BLFO01002587
sc0000523	BLFO01003924
sc0000524	BLFO01001976
sc0000525	BLFO01004834
sc0000526	BLFO01003407
sc0000527	BLFO01003983
sc0000528	BLFO01000274
sc0000529	BLFO01001019
sc0000530	BLFO01004748
sc0000531	BLFO01002899
sc0000532	BLFO01003533
sc0000533	BLFO01001444
sc0000534	BLFO01002195
sc0000535	BLFO01004848
sc0000536	BLFO01004908
sc0000537	BLFO01003876
sc0000538	BLFO01000925
sc0000539	BLFO01002363
sc0000540	BLFO01002344
sc0000541	BLFO01003620
sc0000542	BLFO01000248
sc0000543	BLFO01003336
sc0000544	BLFO01003798
sc0000545	BLFO01002828
sc0000546	BLFO01004722
sc0000547	BLFO01000337
sc0000548	BLFO01000724
sc0000549	BLFO01001866
sc0000550	BLFO01001123
sc0000551	BLFO01000629
sc0000552	BLFO01001358
sc0000553	BLFO01001510
sc0000554	BLFO01002235
sc0000555	BLFO01002401
sc0000556	BLFO01002499
sc0000557	BLFO01003250
sc0000558	BLFO01004040
sc0000559	BLFO01004793
sc0000560	BLFO01002871
sc0000561	BLFO01002485
sc0000562	BLFO01004367
sc0000563	BLFO01004008
sc0000564	BLFO01000507
sc0000565	BLFO01000157
sc0000566	BLFO01000667
sc0000567	BLFO01001643
sc0000568	BLFO01002222
sc0000569	BLFO01002942
sc0000570	BLFO01001746
sc0000571	BLFO01002183
sc0000572	BLFO01004322
sc0000573	BLFO01004812
sc0000574	BLFO01004898
sc0000575	BLFO01000793
sc0000576	BLFO01001325
sc0000577	BLFO01000986
sc0000578	BLFO01002474
sc0000579	BLFO01002911
sc0000580	BLFO01001719
sc0000581	BLFO01001124
sc0000582	BLFO01001892
sc0000583	BLFO01001417
sc0000584	BLFO01002379
sc0000585	BLFO01002952
sc0000586	BLFO01002577
sc0000587	BLFO01003140
sc0000588	BLFO01003957
sc0000589	BLFO01003004
sc0000590	BLFO01003200
sc0000591	BLFO01002535
sc0000592	BLFO01002048
sc0000593	BLFO01001455
sc0000594	BLFO01000846
sc0000595	BLFO01001465
sc0000596	BLFO01000839
sc0000597	BLFO01000283
sc0000598	BLFO01004535
sc0000599	BLFO01002449
sc0000600	BLFO01003464
sc0000601	BLFO01004103
sc0000602	BLFO01002080
sc0000603	BLFO01004744
sc0000604	BLFO01001777
sc0000605	BLFO01002624
sc0000606	BLFO01002950
sc0000607	BLFO01003812
sc0000608	BLFO01004182
sc0000609	BLFO01001475
sc0000610	BLFO01002216
sc0000611	BLFO01003993
sc0000612	BLFO01004870
sc0000613	BLFO01003741
sc0000614	BLFO01001612
sc0000615	BLFO01000963
sc0000616	BLFO01001386
sc0000617	BLFO01000479
sc0000618	BLFO01002856
sc0000619	BLFO01002140
sc0000620	BLFO01002822
sc0000621	BLFO01002061
sc0000622	BLFO01004350
sc0000623	BLFO01003639
sc0000624	BLFO01004354
sc0000625	BLFO01003593
sc0000626	BLFO01000075
sc0000627	BLFO01001081
sc0000628	BLFO01000579
sc0000629	BLFO01002649
sc0000630	BLFO01004790
sc0000631	BLFO01000052
sc0000632	BLFO01003925
sc0000633	BLFO01003651
sc0000634	BLFO01002810
sc0000635	BLFO01002197
sc0000636	BLFO01004890
sc0000637	BLFO01004735
sc0000638	BLFO01001046
sc0000639	BLFO01003786
sc0000640	BLFO01000815
sc0000641	BLFO01004607
sc0000642	BLFO01003427
sc0000643	BLFO01004183
sc0000644	BLFO01003515
sc0000645	BLFO01004185
sc0000646	BLFO01002414
sc0000647	BLFO01000473
sc0000648	BLFO01001190
sc0000649	BLFO01000639
sc0000650	BLFO01003893
sc0000651	BLFO01002312
sc0000652	BLFO01000058
sc0000653	BLFO01004610
sc0000654	BLFO01001502
sc0000655	BLFO01001356
sc0000656	BLFO01000532
sc0000657	BLFO01001092
sc0000658	BLFO01002095
sc0000659	BLFO01002946
sc0000660	BLFO01001920
sc0000661	BLFO01003476
sc0000662	BLFO01001527
sc0000663	BLFO01002294
sc0000664	BLFO01000472
sc0000665	BLFO01001192
sc0000666	BLFO01001200
sc0000667	BLFO01004745
sc0000668	BLFO01003523
sc0000669	BLFO01003254
sc0000670	BLFO01003184
sc0000671	BLFO01003788
sc0000672	BLFO01004582
sc0000673	BLFO01000334
sc0000674	BLFO01000907
sc0000675	BLFO01001525
sc0000676	BLFO01002875
sc0000677	BLFO01000786
sc0000678	BLFO01001796
sc0000679	BLFO01002602
sc0000680	BLFO01000908
sc0000681	BLFO01001047
sc0000682	BLFO01001618
sc0000683	BLFO01001992
sc0000684	BLFO01004700
sc0000685	BLFO01004163
sc0000686	BLFO01002374
sc0000687	BLFO01002396
sc0000688	BLFO01002962
sc0000689	BLFO01000464
sc0000690	BLFO01000135
sc0000691	BLFO01000188
sc0000692	BLFO01004097
sc0000693	BLFO01004206
sc0000694	BLFO01003416
sc0000695	BLFO01003013
sc0000696	BLFO01002372
sc0000697	BLFO01001140
sc0000698	BLFO01000453
sc0000699	BLFO01004775
sc0000700	BLFO01004688
sc0000701	BLFO01001244
sc0000702	BLFO01003667
sc0000703	BLFO01002759
sc0000704	BLFO01002581
sc0000705	BLFO01002343
sc0000706	BLFO01001043
sc0000707	BLFO01000644
sc0000708	BLFO01004171
sc0000709	BLFO01003431
sc0000710	BLFO01002803
sc0000711	BLFO01002406
sc0000712	BLFO01003293
sc0000713	BLFO01003571
sc0000714	BLFO01003622
sc0000715	BLFO01002595
sc0000716	BLFO01003301
sc0000717	BLFO01004385
sc0000718	BLFO01004840
sc0000719	BLFO01000165
sc0000720	BLFO01000400
sc0000721	BLFO01002491
sc0000722	BLFO01004440
sc0000723	BLFO01001609
sc0000724	BLFO01003729
sc0000725	BLFO01000101
sc0000726	BLFO01002238
sc0000727	BLFO01003131
sc0000728	BLFO01001239
sc0000729	BLFO01000645
sc0000730	BLFO01004086
sc0000731	BLFO01001736
sc0000732	BLFO01002522
sc0000733	BLFO01001806
sc0000734	BLFO01002557
sc0000735	BLFO01001039
sc0000736	BLFO01001619
sc0000737	BLFO01004016
sc0000738	BLFO01001915
sc0000739	BLFO01002719
sc0000740	BLFO01001808
sc0000741	BLFO01002919
sc0000742	BLFO01002110
sc0000743	BLFO01004233
sc0000744	BLFO01003291
sc0000745	BLFO01004787
sc0000746	BLFO01001688
sc0000747	BLFO01000910
sc0000748	BLFO01001743
sc0000750	BLFO01002663
sc0000751	BLFO01000218
sc0000752	BLFO01001001
sc0000753	BLFO01001611
sc0000754	BLFO01001753
sc0000755	BLFO01002687
sc0000756	BLFO01003274
sc0000757	BLFO01004081
sc0000758	BLFO01000109
sc0000759	BLFO01000850
sc0000760	BLFO01000872
sc0000761	BLFO01001645
sc0000762	BLFO01004835
sc0000763	BLFO01000107
sc0000764	BLFO01003835
sc0000765	BLFO01001967
sc0000766	BLFO01003021
sc0000767	BLFO01000412
sc0000768	BLFO01001404
sc0000769	BLFO01004771
sc0000770	BLFO01002068
sc0000771	BLFO01004189
sc0000772	BLFO01000159
sc0000773	BLFO01004425
sc0000774	BLFO01001661
sc0000775	BLFO01001069
sc0000776	BLFO01002416
sc0000777	BLFO01001846
sc0000778	BLFO01003958
sc0000779	BLFO01003322
sc0000780	BLFO01001410
sc0000781	BLFO01002954
sc0000782	BLFO01001853
sc0000783	BLFO01003968
sc0000784	BLFO01003296
sc0000785	BLFO01001673
sc0000786	BLFO01002597
sc0000787	BLFO01001479
sc0000788	BLFO01001034
sc0000789	BLFO01002365
sc0000790	BLFO01003695
sc0000791	BLFO01003095
sc0000792	BLFO01004636
sc0000793	BLFO01001350
sc0000795	BLFO01002820
sc0000796	BLFO01002070
sc0000797	BLFO01003580
sc0000798	BLFO01000164
sc0000799	BLFO01004672
sc0000800	BLFO01002949
sc0000801	BLFO01000158
sc0000802	BLFO01004669
sc0000803	BLFO01001659
sc0000804	BLFO01003180
sc0000805	BLFO01000190
sc0000806	BLFO01002860
sc0000807	BLFO01003308
sc0000808	BLFO01001076
sc0000809	BLFO01001837
sc0000810	BLFO01004446
sc0000811	BLFO01001507
sc0000812	BLFO01004100
sc0000813	BLFO01003289
sc0000815	BLFO01000870
sc0000816	BLFO01002138
sc0000817	BLFO01004383
sc0000818	BLFO01003067
sc0000819	BLFO01002317
sc0000820	BLFO01002878
sc0000821	BLFO01002105
sc0000822	BLFO01002945
sc0000823	BLFO01002099
sc0000824	BLFO01003825
sc0000825	BLFO01003684
sc0000826	BLFO01004573
sc0000827	BLFO01000408
sc0000828	BLFO01001267
sc0000829	BLFO01001456
sc0000830	BLFO01003546
sc0000831	BLFO01004121
sc0000832	BLFO01002338
sc0000834	BLFO01000151
sc0000835	BLFO01000895
sc0000836	BLFO01004237
sc0000837	BLFO01003158
sc0000838	BLFO01003042
sc0000839	BLFO01003637
sc0000840	BLFO01004583
sc0000841	BLFO01000072
sc0000842	BLFO01001384
sc0000843	BLFO01000662
sc0000844	BLFO01004560
sc0000845	BLFO01004337
sc0000846	BLFO01003735
sc0000847	BLFO01003055
sc0000848	BLFO01001994
sc0000849	BLFO01001415
sc0000850	BLFO01002106
sc0000851	BLFO01002917
sc0000852	BLFO01000481
sc0000853	BLFO01001078
sc0000854	BLFO01002233
sc0000855	BLFO01003014
sc0000856	BLFO01000990
sc0000857	BLFO01001575
sc0000858	BLFO01000289
sc0000859	BLFO01003746
sc0000860	BLFO01003646
sc0000861	BLFO01004362
sc0000862	BLFO01001646
sc0000863	BLFO01000014
sc0000864	BLFO01002526
sc0000865	BLFO01000612
sc0000866	BLFO01003316
sc0000867	BLFO01002087
sc0000868	BLFO01000143
sc0000869	BLFO01003542
sc0000870	BLFO01001208
sc0000872	BLFO01000960
sc0000873	BLFO01001560
sc0000874	BLFO01004392
sc0000875	BLFO01004507
sc0000876	BLFO01002516
sc0000877	BLFO01003590
sc0000878	BLFO01000689
sc0000879	BLFO01001159
sc0000881	BLFO01004800
sc0000882	BLFO01001660
sc0000883	BLFO01000454
sc0000884	BLFO01004896
sc0000885	BLFO01004468
sc0000886	BLFO01004055
sc0000887	BLFO01002763
sc0000888	BLFO01002600
sc0000889	BLFO01001950
sc0000890	BLFO01003453
sc0000891	BLFO01003045
sc0000892	BLFO01002239
sc0000893	BLFO01000500
sc0000894	BLFO01002973
sc0000895	BLFO01002189
sc0000896	BLFO01001436
sc0000897	BLFO01000685
sc0000898	BLFO01000782
sc0000900	BLFO01003331
sc0000901	BLFO01002632
sc0000902	BLFO01001778
sc0000903	BLFO01001786
sc0000904	BLFO01000995
sc0000905	BLFO01000226
sc0000906	BLFO01003334
sc0000907	BLFO01002916
sc0000908	BLFO01004036
sc0000909	BLFO01003283
sc0000910	BLFO01003103
sc0000911	BLFO01000558
sc0000913	BLFO01002380
sc0000914	BLFO01003024
sc0000916	BLFO01004222
sc0000917	BLFO01004799
sc0000918	BLFO01003115
sc0000919	BLFO01001175
sc0000920	BLFO01001680
sc0000921	BLFO01004302
sc0000922	BLFO01000119
sc0000923	BLFO01003484
sc0000924	BLFO01004184
sc0000925	BLFO01002229
sc0000926	BLFO01003009
sc0000927	BLFO01000999
sc0000928	BLFO01001126
sc0000929	BLFO01000496
sc0000930	BLFO01003405
sc0000931	BLFO01003413
sc0000932	BLFO01004160
sc0000933	BLFO01004772
sc0000934	BLFO01000599
sc0000935	BLFO01000524
sc0000936	BLFO01001250
sc0000937	BLFO01002280
sc0000938	BLFO01002442
sc0000939	BLFO01002847
sc0000940	BLFO01000509
sc0000943	BLFO01000012
sc0000944	BLFO01004674
sc0000945	BLFO01000570
sc0000946	BLFO01001377
sc0000947	BLFO01002370
sc0000948	BLFO01000459
sc0000949	BLFO01003442
sc0000950	BLFO01000388
sc0000952	BLFO01001179
sc0000953	BLFO01003564
sc0000954	BLFO01002796
sc0000955	BLFO01001937
sc0000957	BLFO01000525
sc0000958	BLFO01004643
sc0000959	BLFO01001102
sc0000960	BLFO01003396
sc0000962	BLFO01004009
sc0000963	BLFO01000556
sc0000964	BLFO01000319
sc0000965	BLFO01002240
sc0000966	BLFO01001501
sc0000967	BLFO01002045
sc0000968	BLFO01002115
sc0000969	BLFO01004210
sc0000970	BLFO01004259
sc0000971	BLFO01000716
sc0000972	BLFO01004814
sc0000973	BLFO01000534
sc0000974	BLFO01000929
sc0000975	BLFO01004365
sc0000976	BLFO01002382
sc0000978	BLFO01003556
sc0000980	BLFO01002548
sc0000981	BLFO01003433
sc0000982	BLFO01001366
sc0000983	BLFO01004282
sc0000984	BLFO01003434
sc0000985	BLFO01002767
sc0000986	BLFO01002155
sc0000987	BLFO01002708
sc0000988	BLFO01002185
sc0000989	BLFO01001206
sc0000990	BLFO01002436
sc0000992	BLFO01004084
sc0000993	BLFO01001696
sc0000994	BLFO01002773
sc0000995	BLFO01001597
sc0000996	BLFO01004093
sc0000997	BLFO01002430
sc0000998	BLFO01001014
sc0000999	BLFO01003959
sc0001000	BLFO01001544
sc0001001	BLFO01003843
sc0001002	BLFO01000367
sc0001003	BLFO01002678
sc0001004	BLFO01001955
sc0001005	BLFO01002701
sc0001006	BLFO01001912
sc0001007	BLFO01001617
sc0001008	BLFO01000865
sc0001009	BLFO01003087
sc0001010	BLFO01000284
sc0001011	BLFO01002756
sc0001012	BLFO01002171
sc0001013	BLFO01000560
sc0001014	BLFO01002691
sc0001015	BLFO01001572
sc0001016	BLFO01000432
sc0001017	BLFO01000197
sc0001018	BLFO01004470
sc0001019	BLFO01004031
sc0001020	BLFO01004407
sc0001021	BLFO01001567
sc0001022	BLFO01003917
sc0001023	BLFO01002753
sc0001024	BLFO01002659
sc0001025	BLFO01003998
sc0001026	BLFO01001897
sc0001027	BLFO01004618
sc0001029	BLFO01004829
sc0001030	BLFO01002965
sc0001031	BLFO01000287
sc0001032	BLFO01003981
sc0001033	BLFO01000675
sc0001035	BLFO01002065
sc0001036	BLFO01001326
sc0001037	BLFO01004288
sc0001038	BLFO01002478
sc0001039	BLFO01002175
sc0001040	BLFO01000480
sc0001041	BLFO01000708
sc0001042	BLFO01001311
sc0001043	BLFO01002260
sc0001044	BLFO01002843
sc0001045	BLFO01000078
sc0001046	BLFO01004571
sc0001047	BLFO01000656
sc0001048	BLFO01001370
sc0001049	BLFO01001347
sc0001050	BLFO01001248
sc0001051	BLFO01002330
sc0001052	BLFO01002428
sc0001053	BLFO01003458
sc0001054	BLFO01004281
sc0001055	BLFO01000735
sc0001056	BLFO01001500
sc0001057	BLFO01002198
sc0001058	BLFO01002008
sc0001060	BLFO01002128
sc0001061	BLFO01004846
sc0001062	BLFO01001662
sc0001063	BLFO01001702
sc0001064	BLFO01000455
sc0001065	BLFO01002846
sc0001066	BLFO01002299
sc0001067	BLFO01003321
sc0001069	BLFO01001882
sc0001070	BLFO01000628
sc0001071	BLFO01000810
sc0001073	BLFO01001963
sc0001074	BLFO01002558
sc0001075	BLFO01003137
sc0001076	BLFO01002453
sc0001077	BLFO01000279
sc0001078	BLFO01003526
sc0001079	BLFO01001875
sc0001080	BLFO01001424
sc0001081	BLFO01002174
sc0001082	BLFO01002599
sc0001083	BLFO01003288
sc0001084	BLFO01003802
sc0001085	BLFO01000255
sc0001086	BLFO01000819
sc0001087	BLFO01001470
sc0001088	BLFO01002035
sc0001089	BLFO01002660
sc0001090	BLFO01000797
sc0001091	BLFO01001422
sc0001092	BLFO01003990
sc0001093	BLFO01001789
sc0001094	BLFO01004897
sc0001095	BLFO01003531
sc0001096	BLFO01001631
sc0001097	BLFO01004530
sc0001098	BLFO01001802
sc0001099	BLFO01002589
sc0001100	BLFO01000592
sc0001101	BLFO01002590
sc0001102	BLFO01001800
sc0001103	BLFO01002390
sc0001104	BLFO01002148
sc0001105	BLFO01003997
sc0001107	BLFO01004593
sc0001108	BLFO01001169
sc0001109	BLFO01001306
sc0001110	BLFO01000438
sc0001111	BLFO01001371
sc0001112	BLFO01001134
sc0001113	BLFO01003537
sc0001114	BLFO01003612
sc0001115	BLFO01004382
sc0001116	BLFO01002107
sc0001117	BLFO01002865
sc0001118	BLFO01001118
sc0001119	BLFO01001006
sc0001120	BLFO01000139
sc0001121	BLFO01001774
sc0001122	BLFO01004417
sc0001123	BLFO01000649
sc0001124	BLFO01002645
sc0001125	BLFO01001557
sc0001126	BLFO01000789
sc0001127	BLFO01000290
sc0001128	BLFO01004549
sc0001129	BLFO01004041
sc0001130	BLFO01002816
sc0001131	BLFO01003665
sc0001132	BLFO01004271
sc0001133	BLFO01000386
sc0001134	BLFO01003630
sc0001135	BLFO01000696
sc0001136	BLFO01001305
sc0001137	BLFO01002812
sc0001138	BLFO01000864
sc0001139	BLFO01004334
sc0001140	BLFO01002156
sc0001141	BLFO01002788
sc0001142	BLFO01000578
sc0001143	BLFO01001307
sc0001144	BLFO01000088
sc0001145	BLFO01004679
sc0001147	BLFO01004054
sc0001148	BLFO01000650
sc0001149	BLFO01002809
sc0001151	BLFO01001720
sc0001152	BLFO01000935
sc0001153	BLFO01002627
sc0001154	BLFO01002015
sc0001155	BLFO01003800
sc0001156	BLFO01003208
sc0001157	BLFO01003064
sc0001158	BLFO01002313
sc0001159	BLFO01004230
sc0001160	BLFO01001873
sc0001161	BLFO01002653
sc0001162	BLFO01000869
sc0001164	BLFO01000149
sc0001165	BLFO01003579
sc0001166	BLFO01003343
sc0001167	BLFO01002063
sc0001168	BLFO01001256
sc0001170	BLFO01002749
sc0001172	BLFO01004136
sc0001173	BLFO01001079
sc0001174	BLFO01001059
sc0001175	BLFO01002985
sc0001176	BLFO01003656
sc0001177	BLFO01004234
sc0001178	BLFO01003213
sc0001179	BLFO01004706
sc0001180	BLFO01000919
sc0001181	BLFO01000772
sc0001182	BLFO01004063
sc0001183	BLFO01001960
sc0001184	BLFO01004473
sc0001185	BLFO01001203
sc0001186	BLFO01000431
sc0001187	BLFO01002711
sc0001188	BLFO01004058
sc0001189	BLFO01003280
sc0001190	BLFO01001238
sc0001191	BLFO01000820
sc0001192	BLFO01004906
sc0001194	BLFO01003791
sc0001195	BLFO01002955
sc0001196	BLFO01002604
sc0001197	BLFO01002006
sc0001198	BLFO01001090
sc0001199	BLFO01003892
sc0001200	BLFO01002813
sc0001201	BLFO01002630
sc0001202	BLFO01001443
sc0001203	BLFO01001862
sc0001204	BLFO01003979
sc0001205	BLFO01000668
sc0001206	BLFO01000803
sc0001207	BLFO01003939
sc0001210	BLFO01001337
sc0001211	BLFO01003135
sc0001213	BLFO01001318
sc0001214	BLFO01000384
sc0001215	BLFO01004678
sc0001216	BLFO01001561
sc0001217	BLFO01004301
sc0001219	BLFO01002702
sc0001220	BLFO01002402
sc0001221	BLFO01000587
sc0001223	BLFO01000529
sc0001224	BLFO01004641
sc0001225	BLFO01003673
sc0001226	BLFO01004403
sc0001228	BLFO01003688
sc0001229	BLFO01004563
sc0001230	BLFO01001426
sc0001231	BLFO01003913
sc0001232	BLFO01000267
sc0001234	BLFO01003820
sc0001235	BLFO01001927
sc0001236	BLFO01002658
sc0001237	BLFO01003117
sc0001238	BLFO01004482
sc0001239	BLFO01001913
sc0001240	BLFO01004827
sc0001242	BLFO01004153
sc0001243	BLFO01004251
sc0001244	BLFO01003436
sc0001246	BLFO01001222
sc0001247	BLFO01000951
sc0001248	BLFO01000456
sc0001249	BLFO01002172
sc0001251	BLFO01003922
sc0001252	BLFO01003078
sc0001253	BLFO01002737
sc0001254	BLFO01001978
sc0001255	BLFO01001372
sc0001256	BLFO01004922
sc0001257	BLFO01002202
sc0001258	BLFO01001600
sc0001259	BLFO01003748
sc0001260	BLFO01004867
sc0001262	BLFO01003934
sc0001263	BLFO01002440
sc0001264	BLFO01001756
sc0001266	BLFO01001621
sc0001267	BLFO01003964
sc0001268	BLFO01001987
sc0001269	BLFO01002609
sc0001270	BLFO01003754
sc0001271	BLFO01001259
sc0001272	BLFO01001821
sc0001275	BLFO01004531
sc0001277	BLFO01001042
sc0001278	BLFO01001105
sc0001279	BLFO01002718
sc0001280	BLFO01000235
sc0001281	BLFO01004509
sc0001282	BLFO01001698
sc0001283	BLFO01002146
sc0001284	BLFO01000778
sc0001285	BLFO01000489
sc0001286	BLFO01002614
sc0001287	BLFO01003775
sc0001288	BLFO01003130
sc0001289	BLFO01000222
sc0001290	BLFO01002367
sc0001291	BLFO01003784
sc0001292	BLFO01003330
sc0001293	BLFO01000625
sc0001295	BLFO01000011
sc0001296	BLFO01004512
sc0001297	BLFO01003634
sc0001299	BLFO01002224
sc0001300	BLFO01002391
sc0001301	BLFO01002480
sc0001303	BLFO01000862
sc0001304	BLFO01000618
sc0001305	BLFO01001334
sc0001306	BLFO01004635
sc0001307	BLFO01003662
sc0001309	BLFO01001831
sc0001310	BLFO01002672
sc0001311	BLFO01002055
sc0001312	BLFO01001405
sc0001313	BLFO01000944
sc0001314	BLFO01000233
sc0001315	BLFO01003918
sc0001316	BLFO01002094
sc0001317	BLFO01001503
sc0001318	BLFO01000893
sc0001321	BLFO01003388
sc0001322	BLFO01003319
sc0001323	BLFO01004704
sc0001324	BLFO01000055
sc0001325	BLFO01001700
sc0001326	BLFO01002349
sc0001327	BLFO01001075
sc0001329	BLFO01004788
sc0001330	BLFO01003975
sc0001331	BLFO01003354
sc0001332	BLFO01003980
sc0001333	BLFO01003375
sc0001334	BLFO01000213
sc0001335	BLFO01003070
sc0001336	BLFO01001716
sc0001337	BLFO01000909
sc0001339	BLFO01003811
sc0001340	BLFO01004225
sc0001341	BLFO01004889
sc0001342	BLFO01004390
sc0001343	BLFO01000368
sc0001344	BLFO01000744
sc0001346	BLFO01001991
sc0001347	BLFO01003406
sc0001348	BLFO01003157
sc0001349	BLFO01003923
sc0001350	BLFO01002647
sc0001351	BLFO01002022
sc0001352	BLFO01003823
sc0001353	BLFO01003193
sc0001354	BLFO01004488
sc0001355	BLFO01001723
sc0001356	BLFO01003609
sc0001357	BLFO01001407
sc0001358	BLFO01000636
sc0001360	BLFO01003383
sc0001362	BLFO01004916
sc0001363	BLFO01004464
sc0001364	BLFO01001677
sc0001365	BLFO01000942
sc0001366	BLFO01004824
sc0001367	BLFO01002861
sc0001368	BLFO01001490
sc0001369	BLFO01001012
sc0001370	BLFO01003325
sc0001371	BLFO01003955
sc0001373	BLFO01001626
sc0001374	BLFO01002241
sc0001376	BLFO01002497
sc0001379	BLFO01000130
sc0001380	BLFO01003880
sc0001381	BLFO01001464
sc0001382	BLFO01004548
sc0001383	BLFO01000424
sc0001384	BLFO01000858
sc0001385	BLFO01001570
sc0001386	BLFO01002010
sc0001387	BLFO01002742
sc0001388	BLFO01003105
sc0001389	BLFO01003896
sc0001390	BLFO01000278
sc0001391	BLFO01000863
sc0001392	BLFO01000987
sc0001393	BLFO01001562
sc0001394	BLFO01002530
sc0001395	BLFO01003075
sc0001396	BLFO01003112
sc0001397	BLFO01002640
sc0001398	BLFO01001620
sc0001399	BLFO01001003
sc0001400	BLFO01001056
sc0001401	BLFO01001768
sc0001403	BLFO01001689
sc0001404	BLFO01002795
sc0001405	BLFO01002278
sc0001408	BLFO01003862
sc0001409	BLFO01000138
sc0001410	BLFO01003006
sc0001411	BLFO01003583
sc0001414	BLFO01001893
sc0001415	BLFO01004697
sc0001417	BLFO01004006
sc0001418	BLFO01002905
sc0001419	BLFO01000154
sc0001420	BLFO01002192
sc0001421	BLFO01003002
sc0001422	BLFO01000413
sc0001423	BLFO01001707
sc0001424	BLFO01001607
sc0001425	BLFO01004693
sc0001426	BLFO01000436
sc0001428	BLFO01000980
sc0001429	BLFO01004823
sc0001430	BLFO01003287
sc0001431	BLFO01004652
sc0001432	BLFO01001790
sc0001433	BLFO01003699
sc0001434	BLFO01002205
sc0001435	BLFO01004340
sc0001436	BLFO01001061
sc0001437	BLFO01000506
sc0001438	BLFO01002757
sc0001439	BLFO01002144
sc0001440	BLFO01002549
sc0001441	BLFO01001769
sc0001442	BLFO01001691
sc0001443	BLFO01000889
sc0001444	BLFO01000161
sc0001445	BLFO01002993
sc0001446	BLFO01001573
sc0001447	BLFO01000949
sc0001448	BLFO01000220
sc0001451	BLFO01004817
sc0001452	BLFO01001101
sc0001453	BLFO01001355
sc0001454	BLFO01000410
sc0001455	BLFO01002552
sc0001456	BLFO01002924
sc0001457	BLFO01002376
sc0001458	BLFO01000753
sc0001459	BLFO01001517
sc0001460	BLFO01004216
sc0001461	BLFO01004235
sc0001463	BLFO01000350
sc0001464	BLFO01000465
sc0001465	BLFO01003224
sc0001466	BLFO01000635
sc0001467	BLFO01000996
sc0001468	BLFO01001515
sc0001469	BLFO01001864
sc0001470	BLFO01004547
sc0001471	BLFO01002564
sc0001472	BLFO01001667
sc0001474	BLFO01002670
sc0001477	BLFO01001103
sc0001479	BLFO01003110
sc0001480	BLFO01002085
sc0001481	BLFO01004709
sc0001482	BLFO01001651
sc0001484	BLFO01000535
sc0001485	BLFO01000517
sc0001486	BLFO01003017
sc0001487	BLFO01002126
sc0001489	BLFO01002885
sc0001490	BLFO01000041
sc0001493	BLFO01004321
sc0001494	BLFO01002090
sc0001495	BLFO01002101
sc0001496	BLFO01002840
sc0001497	BLFO01000691
sc0001498	BLFO01001113
sc0001499	BLFO01001135
sc0001500	BLFO01004565
sc0001501	BLFO01003307
sc0001502	BLFO01001247
sc0001503	BLFO01004335
sc0001504	BLFO01000353
sc0001505	BLFO01004603
sc0001506	BLFO01000671
sc0001507	BLFO01001287
sc0001508	BLFO01003770
sc0001509	BLFO01001887
sc0001510	BLFO01002130
sc0001511	BLFO01003371
sc0001512	BLFO01002605
sc0001513	BLFO01001813
sc0001514	BLFO01001065
sc0001515	BLFO01001030
sc0001516	BLFO01004905
sc0001517	BLFO01003455
sc0001518	BLFO01001995
sc0001519	BLFO01002219
sc0001520	BLFO01003707
sc0001521	BLFO01000056
sc0001523	BLFO01002958
sc0001524	BLFO01002951
sc0001525	BLFO01003740
sc0001526	BLFO01001627
sc0001527	BLFO01002142
sc0001528	BLFO01000460
sc0001530	BLFO01004763
sc0001532	BLFO01003323
sc0001534	BLFO01000751
sc0001535	BLFO01001641
sc0001537	BLFO01002488
sc0001538	BLFO01001167
sc0001539	BLFO01004810
sc0001540	BLFO01001131
sc0001541	BLFO01000709
sc0001542	BLFO01004761
sc0001544	BLFO01001452
sc0001545	BLFO01001025
sc0001546	BLFO01000262
sc0001548	BLFO01003872
sc0001549	BLFO01003108
sc0001550	BLFO01003910
sc0001551	BLFO01000001
sc0001552	BLFO01002827
sc0001553	BLFO01003599
sc0001555	BLFO01002825
sc0001556	BLFO01004703
sc0001557	BLFO01000609
sc0001558	BLFO01003604
sc0001559	BLFO01003830
sc0001560	BLFO01004524
sc0001561	BLFO01001457
sc0001563	BLFO01002543
sc0001564	BLFO01001775
sc0001565	BLFO01004030
sc0001566	BLFO01003255
sc0001567	BLFO01004357
sc0001568	BLFO01001289
sc0001569	BLFO01000873
sc0001570	BLFO01000327
sc0001571	BLFO01003142
sc0001572	BLFO01003859
sc0001573	BLFO01001971
sc0001574	BLFO01002745
sc0001575	BLFO01001676
sc0001579	BLFO01003936
sc0001580	BLFO01002245
sc0001581	BLFO01001296
sc0001582	BLFO01000380
sc0001583	BLFO01004487
sc0001584	BLFO01000257
sc0001586	BLFO01001459
sc0001588	BLFO01002496
sc0001589	BLFO01003188
sc0001590	BLFO01003297
sc0001591	BLFO01003943
sc0001592	BLFO01000225
sc0001593	BLFO01000769
sc0001594	BLFO01001569
sc0001595	BLFO01001847
sc0001596	BLFO01002444
sc0001597	BLFO01003379
sc0001598	BLFO01003953
sc0001599	BLFO01004917
sc0001601	BLFO01003629
sc0001602	BLFO01002854
sc0001603	BLFO01002066
sc0001605	BLFO01000580
sc0001606	BLFO01004639
sc0001607	BLFO01004260
sc0001608	BLFO01003668
sc0001610	BLFO01000035
sc0001611	BLFO01001153
sc0001612	BLFO01001737
sc0001613	BLFO01002991
sc0001614	BLFO01003589
sc0001615	BLFO01004188
sc0001616	BLFO01002586
sc0001617	BLFO01001761
sc0001618	BLFO01001339
sc0001619	BLFO01000697
sc0001621	BLFO01004299
sc0001622	BLFO01003863
sc0001623	BLFO01000324
sc0001624	BLFO01003711
sc0001625	BLFO01000745
sc0001627	BLFO01001961
sc0001628	BLFO01002747
sc0001629	BLFO01003966
sc0001630	BLFO01000652
sc0001631	BLFO01003153
sc0001632	BLFO01000356
sc0001633	BLFO01000584
sc0001634	BLFO01001181
sc0001635	BLFO01002776
sc0001636	BLFO01002340
sc0001637	BLFO01004176
sc0001638	BLFO01003538
sc0001639	BLFO01003920
sc0001640	BLFO01002607
sc0001641	BLFO01001263
sc0001642	BLFO01000437
sc0001644	BLFO01000441
sc0001645	BLFO01004366
sc0001646	BLFO01003572
sc0001648	BLFO01002204
sc0001649	BLFO01001834
sc0001651	BLFO01003973
sc0001652	BLFO01001988
sc0001653	BLFO01000731
sc0001654	BLFO01000808
sc0001656	BLFO01004887
sc0001658	BLFO01003186
sc0001659	BLFO01003097
sc0001660	BLFO01002750
sc0001661	BLFO01001229
sc0001662	BLFO01004432
sc0001663	BLFO01000313
sc0001664	BLFO01003452
sc0001665	BLFO01004187
sc0001667	BLFO01002016
sc0001668	BLFO01002569
sc0001669	BLFO01000087
sc0001671	BLFO01002179
sc0001672	BLFO01001160
sc0001674	BLFO01002734
sc0001675	BLFO01004348
sc0001676	BLFO01003540
sc0001677	BLFO01004611
sc0001678	BLFO01004552
sc0001679	BLFO01000282
sc0001680	BLFO01001434
sc0001681	BLFO01003818
sc0001682	BLFO01000247
sc0001683	BLFO01000773
sc0001684	BLFO01001550
sc0001685	BLFO01001850
sc0001686	BLFO01002636
sc0001688	BLFO01003758
sc0001689	BLFO01000137
sc0001690	BLFO01000191
sc0001692	BLFO01003481
sc0001693	BLFO01000276
sc0001694	BLFO01004616
sc0001695	BLFO01004861
sc0001697	BLFO01001540
sc0001698	BLFO01002186
sc0001699	BLFO01002357
sc0001700	BLFO01003027
sc0001701	BLFO01002062
sc0001702	BLFO01001328
sc0001703	BLFO01000633
sc0001705	BLFO01000063
sc0001706	BLFO01004393
sc0001707	BLFO01003155
sc0001708	BLFO01002760
sc0001709	BLFO01002306
sc0001713	BLFO01004250
sc0001714	BLFO01004627
sc0001716	BLFO01001598
sc0001717	BLFO01001754
sc0001718	BLFO01002994
sc0001719	BLFO01003577
sc0001720	BLFO01004664
sc0001721	BLFO01000920
sc0001723	BLFO01004279
sc0001724	BLFO01002163
sc0001725	BLFO01002790
sc0001726	BLFO01000711
sc0001727	BLFO01000774
sc0001728	BLFO01000272
sc0001730	BLFO01001559
sc0001731	BLFO01002351
sc0001732	BLFO01004485
sc0001733	BLFO01000100
sc0001734	BLFO01002434
sc0001736	BLFO01002026
sc0001738	BLFO01000849
sc0001740	BLFO01001868
sc0001741	BLFO01002464
sc0001742	BLFO01001029
sc0001745	BLFO01004925
sc0001746	BLFO01003258
sc0001747	BLFO01004061
sc0001750	BLFO01004232
sc0001751	BLFO01003426
sc0001752	BLFO01002301
sc0001753	BLFO01001630
sc0001755	BLFO01000475
sc0001756	BLFO01000969
sc0001757	BLFO01003865
sc0001758	BLFO01003519
sc0001759	BLFO01002725
sc0001760	BLFO01001211
sc0001761	BLFO01004424
sc0001762	BLFO01002764
sc0001763	BLFO01003742
sc0001764	BLFO01001697
sc0001765	BLFO01001851
sc0001766	BLFO01004079
sc0001767	BLFO01004156
sc0001768	BLFO01002165
sc0001769	BLFO01002923
sc0001770	BLFO01000915
sc0001771	BLFO01004591
sc0001772	BLFO01002620
sc0001773	BLFO01003318
sc0001774	BLFO01001053
sc0001775	BLFO01001810
sc0001776	BLFO01000867
sc0001779	BLFO01004117
sc0001780	BLFO01004344
sc0001782	BLFO01004625
sc0001783	BLFO01000345
sc0001785	BLFO01000563
sc0001786	BLFO01001904
sc0001788	BLFO01000741
sc0001789	BLFO01004721
sc0001790	BLFO01000982
sc0001791	BLFO01000193
sc0001793	BLFO01002481
sc0001795	BLFO01003963
sc0001797	BLFO01000405
sc0001798	BLFO01002412
sc0001800	BLFO01003342
sc0001801	BLFO01004162
sc0001802	BLFO01001825
sc0001804	BLFO01003267
sc0001805	BLFO01003888
sc0001806	BLFO01001833
sc0001807	BLFO01001005
sc0001808	BLFO01001639
sc0001809	BLFO01004258
sc0001810	BLFO01001578
sc0001811	BLFO01001330
sc0001812	BLFO01002309
sc0001813	BLFO01001894
sc0001814	BLFO01000831
sc0001815	BLFO01000371
sc0001817	BLFO01004134
sc0001818	BLFO01003196
sc0001819	BLFO01002618
sc0001820	BLFO01002005
sc0001821	BLFO01004402
sc0001822	BLFO01003596
sc0001823	BLFO01002834
sc0001824	BLFO01002096
sc0001825	BLFO01004406
sc0001826	BLFO01003582
sc0001828	BLFO01004629
sc0001829	BLFO01003367
sc0001831	BLFO01003262
sc0001833	BLFO01002423
sc0001834	BLFO01001883
sc0001835	BLFO01001625
sc0001836	BLFO01000994
sc0001837	BLFO01002685
sc0001838	BLFO01004296
sc0001839	BLFO01004065
sc0001840	BLFO01002333
sc0001841	BLFO01001314
sc0001842	BLFO01000378
sc0001843	BLFO01000581
sc0001846	BLFO01001650
sc0001847	BLFO01003056
sc0001848	BLFO01002285
sc0001849	BLFO01004194
sc0001850	BLFO01003940
sc0001851	BLFO01003730
sc0001852	BLFO01000112
sc0001853	BLFO01003365
sc0001854	BLFO01003822
sc0001855	BLFO01004429
sc0001856	BLFO01000355
sc0001857	BLFO01002769
sc0001858	BLFO01000776
sc0001859	BLFO01004276
sc0001860	BLFO01001176
sc0001861	BLFO01001827
sc0001862	BLFO01004714
sc0001863	BLFO01000515
sc0001864	BLFO01001117
sc0001865	BLFO01001871
sc0001866	BLFO01004727
sc0001867	BLFO01003568
sc0001868	BLFO01003317
sc0001870	BLFO01002906
sc0001871	BLFO01004661
sc0001873	BLFO01003625
sc0001874	BLFO01004343
sc0001875	BLFO01004590
sc0001876	BLFO01000543
sc0001877	BLFO01001505
sc0001878	BLFO01001989
sc0001879	BLFO01003039
sc0001880	BLFO01001281
sc0001883	BLFO01002705
sc0001884	BLFO01000407
sc0001886	BLFO01002936
sc0001887	BLFO01003715
sc0001888	BLFO01004200
sc0001890	BLFO01000552
sc0001892	BLFO01002770
sc0001893	BLFO01003713
sc0001894	BLFO01003029
sc0001896	BLFO01003797
sc0001897	BLFO01000703
sc0001898	BLFO01004730
sc0001900	BLFO01000984
sc0001901	BLFO01000251
sc0001905	BLFO01003217
sc0001906	BLFO01002470
sc0001907	BLFO01002419
sc0001908	BLFO01001663
sc0001909	BLFO01000877
sc0001910	BLFO01001189
sc0001911	BLFO01000616
sc0001912	BLFO01001319
sc0001913	BLFO01001427
sc0001914	BLFO01002196
sc0001916	BLFO01002451
sc0001917	BLFO01003266
sc0001918	BLFO01004083
sc0001919	BLFO01004857
sc0001920	BLFO01002213
sc0001921	BLFO01002486
sc0001922	BLFO01000956
sc0001924	BLFO01000375
sc0001925	BLFO01003501
sc0001926	BLFO01004132
sc0001929	BLFO01002002
sc0001931	BLFO01004264
sc0001932	BLFO01002164
sc0001933	BLFO01000376
sc0001935	BLFO01000555
sc0001938	BLFO01004632
sc0001939	BLFO01003666
sc0001941	BLFO01002736
sc0001944	BLFO01001016
sc0001945	BLFO01000108
sc0001946	BLFO01003994
sc0001947	BLFO01000214
sc0001948	BLFO01003411
sc0001949	BLFO01003358
sc0001951	BLFO01000495
sc0001952	BLFO01001063
sc0001953	BLFO01002355
sc0001955	BLFO01002019
sc0001956	BLFO01004096
sc0001957	BLFO01001832
sc0001959	BLFO01001686
sc0001961	BLFO01003311
sc0001962	BLFO01003553
sc0001963	BLFO01000111
sc0001966	BLFO01000321
sc0001967	BLFO01002318
sc0001968	BLFO01001485
sc0001969	BLFO01003397
sc0001970	BLFO01000065
sc0001972	BLFO01004646
sc0001975	BLFO01002989
sc0001976	BLFO01002504
sc0001977	BLFO01004220
sc0001978	BLFO01003584
sc0001979	BLFO01004833
sc0001980	BLFO01001530
sc0001982	BLFO01000501
sc0001983	BLFO01002969
sc0001985	BLFO01004196
sc0001986	BLFO01003749
sc0001987	BLFO01000098
sc0001988	BLFO01004328
sc0001989	BLFO01000642
sc0001992	BLFO01002805
sc0001993	BLFO01004368
sc0001995	BLFO01000443
sc0001997	BLFO01001924
sc0001998	BLFO01001477
sc0001999	BLFO01002829
sc0002001	BLFO01000228
sc0002002	BLFO01000926
sc0002003	BLFO01001709
sc0002004	BLFO01002532
sc0002006	BLFO01003315
sc0002008	BLFO01003631
sc0002009	BLFO01003967
sc0002010	BLFO01001687
sc0002011	BLFO01002931
sc0002012	BLFO01002167
sc0002013	BLFO01004128
sc0002015	BLFO01004854
sc0002017	BLFO01001197
sc0002018	BLFO01000462
sc0002021	BLFO01003121
sc0002022	BLFO01004046
sc0002023	BLFO01002966
sc0002025	BLFO01001682
sc0002026	BLFO01002575
sc0002027	BLFO01004602
sc0002028	BLFO01003595
sc0002029	BLFO01004032
sc0002030	BLFO01001863
sc0002031	BLFO01004873
sc0002032	BLFO01003690
sc0002033	BLFO01001290
sc0002034	BLFO01004419
sc0002035	BLFO01001788
sc0002036	BLFO01002612
sc0002037	BLFO01004268
sc0002038	BLFO01003860
sc0002039	BLFO01004520
sc0002040	BLFO01003764
sc0002041	BLFO01003212
sc0002042	BLFO01004822
sc0002044	BLFO01001471
sc0002046	BLFO01002995
sc0002047	BLFO01002429
sc0002048	BLFO01001889
sc0002049	BLFO01001652
sc0002052	BLFO01004500
sc0002054	BLFO01000824
sc0002055	BLFO01001403
sc0002056	BLFO01002683
sc0002058	BLFO01003808
sc0002059	BLFO01001962
sc0002060	BLFO01000622
sc0002061	BLFO01003451
sc0002062	BLFO01004129
sc0002063	BLFO01002518
sc0002064	BLFO01002998
sc0002065	BLFO01002007
sc0002066	BLFO01002462
sc0002067	BLFO01000767
sc0002068	BLFO01001531
sc0002069	BLFO01004418
sc0002070	BLFO01000403
sc0002071	BLFO01004211
sc0002072	BLFO01002237
sc0002073	BLFO01000749
sc0002074	BLFO01004770
sc0002078	BLFO01001088
sc0002079	BLFO01002153
sc0002080	BLFO01004640
sc0002081	BLFO01002644
sc0002082	BLFO01003545
sc0002083	BLFO01001412
sc0002084	BLFO01002348
sc0002085	BLFO01004522
sc0002086	BLFO01000775
sc0002087	BLFO01004256
sc0002088	BLFO01001794
sc0002090	BLFO01000983
sc0002091	BLFO01003428
sc0002092	BLFO01003359
sc0002093	BLFO01002544
sc0002095	BLFO01001040
sc0002096	BLFO01002484
sc0002097	BLFO01002927
sc0002098	BLFO01001623
sc0002099	BLFO01003176
sc0002100	BLFO01000288
sc0002101	BLFO01003194
sc0002102	BLFO01003782
sc0002103	BLFO01002031
sc0002104	BLFO01003827
sc0002105	BLFO01002042
sc0002106	BLFO01002667
sc0002108	BLFO01003125
sc0002110	BLFO01004794
sc0002112	BLFO01003512
sc0002113	BLFO01002791
sc0002115	BLFO01001147
sc0002117	BLFO01004769
sc0002118	BLFO01000335
sc0002119	BLFO01003409
sc0002122	BLFO01001563
sc0002123	BLFO01001087
sc0002124	BLFO01000484
sc0002126	BLFO01002383
sc0002127	BLFO01001119
sc0002128	BLFO01000539
sc0002129	BLFO01002922
sc0002130	BLFO01002503
sc0002131	BLFO01003370
sc0002132	BLFO01004047
sc0002134	BLFO01002538
sc0002135	BLFO01001726
sc0002136	BLFO01002336
sc0002137	BLFO01004869
sc0002138	BLFO01000833
sc0002139	BLFO01003988
sc0002140	BLFO01003219
sc0002143	BLFO01000299
sc0002144	BLFO01000840
sc0002145	BLFO01004026
sc0002146	BLFO01000617
sc0002148	BLFO01003810
sc0002150	BLFO01003129
sc0002151	BLFO01000574
sc0002152	BLFO01001174
sc0002153	BLFO01000034
sc0002156	BLFO01004370
sc0002157	BLFO01002086
sc0002158	BLFO01002842
sc0002159	BLFO01002676
sc0002161	BLFO01000338
sc0002162	BLFO01004436
sc0002163	BLFO01000715
sc0002164	BLFO01000326
sc0002165	BLFO01001979
sc0002166	BLFO01001484
sc0002167	BLFO01002507
sc0002168	BLFO01001909
sc0002169	BLFO01004478
sc0002170	BLFO01001764
sc0002171	BLFO01000742
sc0002172	BLFO01002981
sc0002173	BLFO01000859
sc0002174	BLFO01001446
sc0002175	BLFO01003151
sc0002176	BLFO01004481
sc0002177	BLFO01001953
sc0002178	BLFO01003792
sc0002179	BLFO01001137
sc0002182	BLFO01000747
sc0002183	BLFO01002037
sc0002184	BLFO01002673
sc0002185	BLFO01003096
sc0002186	BLFO01003886
sc0002187	BLFO01001941
sc0002188	BLFO01002704
sc0002189	BLFO01003111
sc0002190	BLFO01002970
sc0002191	BLFO01004437
sc0002192	BLFO01004257
sc0002193	BLFO01000755
sc0002194	BLFO01004791
sc0002195	BLFO01001944
sc0002196	BLFO01001195
sc0002197	BLFO01003005
sc0002198	BLFO01002215
sc0002199	BLFO01002634
sc0002200	BLFO01003507
sc0002201	BLFO01000254
sc0002202	BLFO01000294
sc0002205	BLFO01002208
sc0002206	BLFO01001911
sc0002207	BLFO01003594
sc0002208	BLFO01004154
sc0002209	BLFO01000328
sc0002210	BLFO01000763
sc0002211	BLFO01000548
sc0002212	BLFO01000939
sc0002213	BLFO01002027
sc0002215	BLFO01003614
[truncated: 1,533 more rows]

## Sheet: M. efflorescens
Scaffold ID	Accession no.
sc0000001	BLFP01001640
sc0000002	BLFP01001048
sc0000003	BLFP01001708
sc0000004	BLFP01003895
sc0000005	BLFP01000185
sc0000006	BLFP01004425
sc0000007	BLFP01004172
sc0000008	BLFP01001931
sc0000009	BLFP01002621
sc0000010	BLFP01004875
sc0000011	BLFP01000009
sc0000012	BLFP01004104
sc0000013	BLFP01004657
sc0000014	BLFP01000092
sc0000015	BLFP01004343
sc0000016	BLFP01004355
sc0000017	BLFP01003738
sc0000018	BLFP01002464
sc0000019	BLFP01001506
sc0000020	BLFP01002162
sc0000021	BLFP01001286
sc0000022	BLFP01002247
sc0000023	BLFP01001601
sc0000024	BLFP01001385
sc0000025	BLFP01000725
sc0000026	BLFP01000100
sc0000027	BLFP01004233
sc0000028	BLFP01003888
sc0000029	BLFP01002598
sc0000030	BLFP01002350
sc0000031	BLFP01002823
sc0000032	BLFP01003798
sc0000033	BLFP01004601
sc0000034	BLFP01002317
sc0000035	BLFP01002964
sc0000036	BLFP01003967
sc0000037	BLFP01004590
sc0000038	BLFP01005035
sc0000039	BLFP01000554
sc0000040	BLFP01004386
sc0000041	BLFP01004241
sc0000042	BLFP01003586
sc0000043	BLFP01004184
sc0000044	BLFP01002011
sc0000045	BLFP01003212
sc0000046	BLFP01000992
sc0000047	BLFP01001634
sc0000048	BLFP01002949
sc0000049	BLFP01002278
sc0000050	BLFP01001592
sc0000051	BLFP01000877
sc0000052	BLFP01002875
sc0000053	BLFP01002112
sc0000054	BLFP01005140
sc0000055	BLFP01000892
sc0000056	BLFP01001323
sc0000057	BLFP01000505
sc0000058	BLFP01002514
sc0000059	BLFP01001703
sc0000060	BLFP01001302
sc0000061	BLFP01000482
sc0000062	BLFP01004123
sc0000063	BLFP01003272
sc0000064	BLFP01000411
sc0000065	BLFP01004748
sc0000066	BLFP01001641
sc0000067	BLFP01000808
sc0000068	BLFP01001896
sc0000069	BLFP01001404
sc0000070	BLFP01003909
sc0000071	BLFP01004581
sc0000072	BLFP01001279
sc0000073	BLFP01000003
sc0000074	BLFP01002359
sc0000075	BLFP01002958
sc0000076	BLFP01003902
sc0000077	BLFP01004517
sc0000078	BLFP01000199
sc0000079	BLFP01003965
sc0000080	BLFP01000050
sc0000081	BLFP01000293
sc0000082	BLFP01000669
sc0000083	BLFP01001466
sc0000084	BLFP01000032
sc0000085	BLFP01004943
sc0000086	BLFP01003068
sc0000087	BLFP01003899
sc0000088	BLFP01001839
sc0000089	BLFP01002400
sc0000090	BLFP01000529
sc0000091	BLFP01001408
sc0000092	BLFP01003571
sc0000093	BLFP01003650
sc0000094	BLFP01000274
sc0000095	BLFP01005062
sc0000096	BLFP01002199
sc0000097	BLFP01004235
sc0000098	BLFP01002680
sc0000099	BLFP01001894
sc0000100	BLFP01002936
sc0000101	BLFP01004302
sc0000102	BLFP01000739
sc0000103	BLFP01003385
sc0000104	BLFP01005107
sc0000105	BLFP01002488
sc0000106	BLFP01004562
sc0000107	BLFP01001722
sc0000108	BLFP01000078
sc0000109	BLFP01000134
sc0000110	BLFP01001002
sc0000111	BLFP01004615
sc0000112	BLFP01003793
sc0000113	BLFP01005029
sc0000114	BLFP01002245
sc0000115	BLFP01000665
sc0000116	BLFP01004827
sc0000117	BLFP01003187
sc0000118	BLFP01002385
sc0000119	BLFP01003797
sc0000120	BLFP01001244
sc0000121	BLFP01000372
sc0000122	BLFP01000791
sc0000123	BLFP01001953
sc0000124	BLFP01002376
sc0000125	BLFP01003448
sc0000126	BLFP01004294
sc0000127	BLFP01003441
sc0000128	BLFP01004046
sc0000129	BLFP01003114
sc0000130	BLFP01002214
sc0000131	BLFP01004765
sc0000132	BLFP01001232
sc0000133	BLFP01000926
sc0000134	BLFP01003101
sc0000135	BLFP01004426
sc0000136	BLFP01003757
sc0000137	BLFP01003374
sc0000138	BLFP01005121
sc0000139	BLFP01000425
sc0000140	BLFP01004606
sc0000141	BLFP01004815
sc0000142	BLFP01000157
sc0000143	BLFP01000946
sc0000144	BLFP01000677
sc0000145	BLFP01001471
sc0000146	BLFP01001884
sc0000147	BLFP01004318
sc0000148	BLFP01000008
sc0000149	BLFP01004890
sc0000150	BLFP01002710
sc0000151	BLFP01001062
sc0000152	BLFP01000156
sc0000153	BLFP01004217
sc0000154	BLFP01003549
sc0000155	BLFP01002604
sc0000156	BLFP01001958
sc0000157	BLFP01001701
sc0000158	BLFP01001075
sc0000159	BLFP01001709
sc0000160	BLFP01000995
sc0000161	BLFP01000704
sc0000162	BLFP01002682
sc0000163	BLFP01004315
sc0000164	BLFP01003476
sc0000165	BLFP01000291
sc0000166	BLFP01004093
sc0000167	BLFP01004953
sc0000168	BLFP01000059
sc0000169	BLFP01001329
sc0000170	BLFP01005135
sc0000171	BLFP01005110
sc0000172	BLFP01005154
sc0000173	BLFP01001199
sc0000174	BLFP01000651
sc0000175	BLFP01003129
sc0000176	BLFP01001891
sc0000177	BLFP01004397
sc0000178	BLFP01003824
sc0000179	BLFP01004421
sc0000180	BLFP01002457
sc0000181	BLFP01003269
sc0000182	BLFP01003681
sc0000183	BLFP01003638
sc0000184	BLFP01004451
sc0000185	BLFP01000991
sc0000186	BLFP01005074
sc0000187	BLFP01003934
sc0000188	BLFP01004469
sc0000189	BLFP01001299
sc0000190	BLFP01004201
sc0000191	BLFP01000258
sc0000192	BLFP01002685
sc0000193	BLFP01003316
sc0000194	BLFP01004993
sc0000195	BLFP01002017
sc0000196	BLFP01004578
sc0000197	BLFP01001100
sc0000198	BLFP01002984
sc0000199	BLFP01001330
sc0000200	BLFP01000984
sc0000201	BLFP01001555
sc0000202	BLFP01004491
sc0000203	BLFP01003608
sc0000204	BLFP01005122
sc0000205	BLFP01000749
sc0000206	BLFP01000084
sc0000207	BLFP01001026
sc0000208	BLFP01000726
sc0000209	BLFP01002602
sc0000210	BLFP01002944
sc0000211	BLFP01002329
sc0000212	BLFP01004513
sc0000213	BLFP01003891
sc0000214	BLFP01004842
sc0000215	BLFP01001783
sc0000216	BLFP01001357
sc0000217	BLFP01001635
sc0000218	BLFP01001071
sc0000219	BLFP01003230
sc0000220	BLFP01003807
sc0000221	BLFP01004180
sc0000222	BLFP01003628
sc0000223	BLFP01002879
sc0000224	BLFP01002175
sc0000225	BLFP01001411
sc0000226	BLFP01004887
sc0000227	BLFP01000007
sc0000228	BLFP01002553
sc0000229	BLFP01004354
sc0000230	BLFP01003661
sc0000231	BLFP01004507
sc0000232	BLFP01002461
sc0000233	BLFP01003200
sc0000234	BLFP01003228
sc0000235	BLFP01000590
sc0000236	BLFP01001393
sc0000237	BLFP01000562
sc0000238	BLFP01001816
sc0000239	BLFP01004980
sc0000240	BLFP01002749
sc0000241	BLFP01001925
sc0000242	BLFP01001763
sc0000243	BLFP01002556
sc0000244	BLFP01000536
sc0000245	BLFP01001336
sc0000246	BLFP01004223
sc0000247	BLFP01002322
sc0000248	BLFP01002988
sc0000249	BLFP01003761
sc0000250	BLFP01000918
sc0000251	BLFP01001583
sc0000252	BLFP01004823
sc0000253	BLFP01000296
sc0000254	BLFP01003087
sc0000255	BLFP01003319
sc0000256	BLFP01001494
sc0000257	BLFP01002110
sc0000258	BLFP01000793
sc0000259	BLFP01005015
sc0000260	BLFP01001899
sc0000261	BLFP01002437
sc0000262	BLFP01001674
sc0000263	BLFP01000856
sc0000264	BLFP01002658
sc0000265	BLFP01001991
sc0000266	BLFP01004253
sc0000267	BLFP01004358
sc0000268	BLFP01000867
sc0000269	BLFP01000275
sc0000270	BLFP01002633
sc0000271	BLFP01002028
sc0000272	BLFP01004277
sc0000273	BLFP01003484
sc0000274	BLFP01000282
sc0000275	BLFP01003576
sc0000276	BLFP01001878
sc0000277	BLFP01001027
sc0000278	BLFP01003445
sc0000279	BLFP01002704
sc0000280	BLFP01002548
sc0000281	BLFP01001512
sc0000282	BLFP01003153
sc0000283	BLFP01001111
sc0000284	BLFP01004270
sc0000285	BLFP01002232
sc0000286	BLFP01001365
sc0000287	BLFP01005052
sc0000288	BLFP01001799
sc0000289	BLFP01001297
sc0000290	BLFP01004652
sc0000291	BLFP01002308
sc0000292	BLFP01004919
sc0000293	BLFP01003920
sc0000294	BLFP01001493
sc0000295	BLFP01000210
sc0000296	BLFP01002370
sc0000297	BLFP01002973
sc0000298	BLFP01002358
sc0000299	BLFP01002961
sc0000300	BLFP01003564
sc0000301	BLFP01000537
sc0000302	BLFP01001092
sc0000303	BLFP01000738
sc0000304	BLFP01004880
sc0000305	BLFP01003732
sc0000306	BLFP01004319
sc0000307	BLFP01002489
sc0000308	BLFP01003198
sc0000309	BLFP01002374
sc0000310	BLFP01004133
sc0000311	BLFP01004371
sc0000312	BLFP01004818
sc0000313	BLFP01000893
sc0000314	BLFP01001536
sc0000315	BLFP01002265
sc0000316	BLFP01003052
sc0000317	BLFP01002261
sc0000318	BLFP01003061
sc0000319	BLFP01004160
sc0000320	BLFP01001669
sc0000321	BLFP01000295
sc0000322	BLFP01003727
sc0000323	BLFP01001513
sc0000324	BLFP01002377
sc0000325	BLFP01002131
sc0000326	BLFP01002913
sc0000327	BLFP01003281
sc0000328	BLFP01004097
sc0000329	BLFP01003613
sc0000330	BLFP01003641
sc0000331	BLFP01000761
sc0000332	BLFP01001370
sc0000333	BLFP01001497
sc0000334	BLFP01005130
sc0000335	BLFP01004356
sc0000336	BLFP01004071
sc0000337	BLFP01003971
sc0000338	BLFP01004064
sc0000339	BLFP01002013
sc0000340	BLFP01001861
sc0000341	BLFP01000662
sc0000342	BLFP01001257
sc0000343	BLFP01004410
sc0000344	BLFP01003026
sc0000345	BLFP01003615
sc0000346	BLFP01004493
sc0000347	BLFP01002470
sc0000348	BLFP01003267
sc0000349	BLFP01000526
sc0000350	BLFP01000697
sc0000351	BLFP01004173
sc0000352	BLFP01001976
sc0000353	BLFP01003601
sc0000354	BLFP01004187
sc0000355	BLFP01003763
sc0000356	BLFP01000179
sc0000357	BLFP01001704
sc0000358	BLFP01003642
sc0000359	BLFP01001971
sc0000360	BLFP01002001
sc0000361	BLFP01004861
sc0000362	BLFP01003280
sc0000363	BLFP01001573
sc0000364	BLFP01004697
sc0000365	BLFP01002116
sc0000366	BLFP01002915
sc0000367	BLFP01003309
sc0000368	BLFP01004080
sc0000369	BLFP01003906
sc0000370	BLFP01000445
sc0000371	BLFP01005024
sc0000372	BLFP01002630
sc0000373	BLFP01004403
sc0000374	BLFP01003739
sc0000375	BLFP01003097
sc0000376	BLFP01002478
sc0000377	BLFP01001021
sc0000378	BLFP01001825
sc0000379	BLFP01003378
sc0000380	BLFP01000792
sc0000381	BLFP01000051
sc0000382	BLFP01004894
sc0000383	BLFP01004446
sc0000384	BLFP01004709
sc0000385	BLFP01002857
sc0000386	BLFP01003618
sc0000387	BLFP01001293
sc0000388	BLFP01002141
sc0000389	BLFP01001089
sc0000390	BLFP01003993
sc0000391	BLFP01001586
sc0000392	BLFP01000970
sc0000393	BLFP01002194
sc0000394	BLFP01001570
sc0000395	BLFP01003335
sc0000396	BLFP01002770
sc0000397	BLFP01004772
sc0000398	BLFP01003341
sc0000399	BLFP01000888
sc0000400	BLFP01001079
sc0000401	BLFP01004048
sc0000402	BLFP01000422
sc0000403	BLFP01004754
sc0000404	BLFP01001675
sc0000405	BLFP01000845
sc0000407	BLFP01002034
sc0000408	BLFP01001355
sc0000409	BLFP01000163
sc0000410	BLFP01000099
sc0000411	BLFP01005126
sc0000412	BLFP01003512
sc0000413	BLFP01004375
sc0000414	BLFP01002290
sc0000415	BLFP01003261
sc0000416	BLFP01003703
sc0000417	BLFP01004351
sc0000418	BLFP01002675
sc0000419	BLFP01003232
sc0000420	BLFP01003943
sc0000421	BLFP01004596
sc0000422	BLFP01004720
sc0000423	BLFP01004859
sc0000424	BLFP01001602
sc0000425	BLFP01004703
sc0000426	BLFP01002165
sc0000427	BLFP01000865
sc0000428	BLFP01004118
sc0000429	BLFP01002171
sc0000430	BLFP01004039
sc0000431	BLFP01003314
sc0000432	BLFP01000021
sc0000433	BLFP01004768
sc0000434	BLFP01001689
sc0000435	BLFP01000924
sc0000436	BLFP01002316
sc0000437	BLFP01001463
sc0000438	BLFP01003467
sc0000439	BLFP01002693
sc0000440	BLFP01003490
sc0000441	BLFP01004610
sc0000442	BLFP01000161
sc0000443	BLFP01001061
sc0000444	BLFP01001781
sc0000445	BLFP01002269
sc0000446	BLFP01002068
sc0000447	BLFP01002895
sc0000448	BLFP01002609
sc0000449	BLFP01003914
sc0000450	BLFP01000480
sc0000451	BLFP01001254
sc0000452	BLFP01002769
sc0000453	BLFP01003419
sc0000454	BLFP01003647
sc0000455	BLFP01004381
sc0000456	BLFP01004514
sc0000457	BLFP01003718
sc0000458	BLFP01003362
sc0000459	BLFP01002571
sc0000460	BLFP01002986
sc0000461	BLFP01002536
sc0000462	BLFP01002059
sc0000463	BLFP01003713
sc0000464	BLFP01004871
sc0000465	BLFP01000881
sc0000466	BLFP01001326
sc0000467	BLFP01000538
sc0000468	BLFP01000840
sc0000469	BLFP01003266
sc0000470	BLFP01004924
sc0000471	BLFP01000289
sc0000472	BLFP01001492
sc0000473	BLFP01000508
sc0000474	BLFP01002951
sc0000475	BLFP01002331
sc0000476	BLFP01003238
sc0000477	BLFP01002302
sc0000478	BLFP01003421
sc0000479	BLFP01003867
sc0000480	BLFP01003780
sc0000481	BLFP01004352
sc0000482	BLFP01002508
sc0000483	BLFP01003076
sc0000484	BLFP01001270
sc0000485	BLFP01000031
sc0000486	BLFP01005083
sc0000487	BLFP01003769
sc0000488	BLFP01001177
sc0000489	BLFP01000188
sc0000490	BLFP01003185
sc0000491	BLFP01002563
sc0000492	BLFP01001758
sc0000493	BLFP01003862
sc0000494	BLFP01005161
sc0000495	BLFP01003538
sc0000496	BLFP01002613
sc0000497	BLFP01001859
sc0000498	BLFP01004739
sc0000499	BLFP01000249
sc0000500	BLFP01001909
sc0000501	BLFP01001209
sc0000502	BLFP01000625
sc0000503	BLFP01003102
sc0000504	BLFP01002428
sc0000505	BLFP01000342
sc0000506	BLFP01001458
sc0000507	BLFP01003436
sc0000508	BLFP01005109
sc0000509	BLFP01002501
sc0000510	BLFP01003202
sc0000511	BLFP01001237
sc0000512	BLFP01000618
sc0000513	BLFP01005090
sc0000514	BLFP01005160
sc0000515	BLFP01002309
sc0000516	BLFP01004556
sc0000517	BLFP01001041
sc0000518	BLFP01002678
sc0000519	BLFP01001486
sc0000520	BLFP01004423
sc0000521	BLFP01001885
sc0000522	BLFP01002758
sc0000523	BLFP01004163
sc0000524	BLFP01002117
sc0000525	BLFP01005113
sc0000526	BLFP01003624
sc0000527	BLFP01004203
sc0000528	BLFP01000337
sc0000529	BLFP01001119
sc0000530	BLFP01005025
sc0000531	BLFP01003090
sc0000532	BLFP01003755
sc0000533	BLFP01001564
sc0000534	BLFP01002342
sc0000535	BLFP01005127
sc0000536	BLFP01000129
sc0000537	BLFP01004111
sc0000538	BLFP01000980
sc0000539	BLFP01002518
sc0000540	BLFP01002465
sc0000541	BLFP01003829
sc0000542	BLFP01000310
sc0000543	BLFP01003548
sc0000544	BLFP01004031
sc0000545	BLFP01003004
sc0000546	BLFP01004997
sc0000547	BLFP01000401
sc0000548	BLFP01000802
sc0000549	BLFP01002002
sc0000550	BLFP01001189
sc0000551	BLFP01000706
sc0000553	BLFP01001631
sc0000554	BLFP01002384
sc0000555	BLFP01002561
sc0000556	BLFP01002665
sc0000557	BLFP01003457
sc0000558	BLFP01004282
sc0000559	BLFP01005072
sc0000561	BLFP01002650
sc0000562	BLFP01004622
sc0000563	BLFP01004249
sc0000564	BLFP01000551
sc0000565	BLFP01000211
sc0000566	BLFP01000745
sc0000567	BLFP01001768
sc0000568	BLFP01002371
sc0000569	BLFP01003137
sc0000570	BLFP01001879
sc0000572	BLFP01004576
sc0000573	BLFP01005091
sc0000574	BLFP01000118
sc0000575	BLFP01000848
sc0000576	BLFP01001439
sc0000577	BLFP01001086
sc0000579	BLFP01003105
sc0000580	BLFP01001850
sc0000581	BLFP01001231
sc0000582	BLFP01002030
sc0000583	BLFP01001533
sc0000584	BLFP01002537
sc0000585	BLFP01003146
sc0000586	BLFP01002747
sc0000587	BLFP01003342
sc0000588	BLFP01004197
sc0000589	BLFP01003180
sc0000590	BLFP01003406
sc0000591	BLFP01002703
sc0000592	BLFP01002189
sc0000593	BLFP01001575
sc0000594	BLFP01000937
sc0000595	BLFP01001584
sc0000596	BLFP01000928
sc0000597	BLFP01000346
sc0000598	BLFP01004800
sc0000599	BLFP01002612
sc0000600	BLFP01003682
sc0000601	BLFP01004349
sc0000603	BLFP01005021
sc0000604	BLFP01001910
sc0000605	BLFP01002798
sc0000606	BLFP01003144
sc0000607	BLFP01004045
sc0000608	BLFP01004428
sc0000609	BLFP01001552
sc0000610	BLFP01002363
sc0000611	BLFP01004234
sc0000612	BLFP01005150
sc0000613	BLFP01003950
sc0000614	BLFP01001735
sc0000615	BLFP01001063
sc0000616	BLFP01001501
sc0000617	BLFP01000548
sc0000618	BLFP01003043
sc0000619	BLFP01002285
sc0000620	BLFP01003008
sc0000621	BLFP01002203
sc0000622	BLFP01004604
sc0000623	BLFP01003866
sc0000624	BLFP01004608
sc0000625	BLFP01003816
sc0000626	BLFP01000077
sc0000627	BLFP01001186
sc0000628	BLFP01000655
sc0000629	BLFP01002824
sc0000630	BLFP01005069
sc0000631	BLFP01000054
sc0000632	BLFP01004164
sc0000633	BLFP01003879
sc0000634	BLFP01002994
sc0000635	BLFP01002345
sc0000637	BLFP01005011
sc0000638	BLFP01001112
sc0000639	BLFP01004018
sc0000640	BLFP01000870
sc0000641	BLFP01004874
sc0000642	BLFP01003645
sc0000643	BLFP01004429
sc0000644	BLFP01003737
sc0000645	BLFP01004431
sc0000646	BLFP01002574
sc0000647	BLFP01000543
sc0000648	BLFP01001298
sc0000649	BLFP01000694
sc0000650	BLFP01004130
sc0000651	BLFP01002466
sc0000652	BLFP01000060
sc0000653	BLFP01004878
sc0000655	BLFP01001470
sc0000656	BLFP01000607
sc0000658	BLFP01002238
sc0000659	BLFP01003141
sc0000660	BLFP01002060
sc0000661	BLFP01003696
sc0000662	BLFP01001648
sc0000663	BLFP01002447
sc0000664	BLFP01000541
sc0000665	BLFP01001301
sc0000666	BLFP01001266
sc0000667	BLFP01005022
sc0000668	BLFP01003745
sc0000669	BLFP01003461
sc0000670	BLFP01003390
sc0000671	BLFP01004021
sc0000672	BLFP01004847
sc0000673	BLFP01000398
sc0000674	BLFP01001004
sc0000675	BLFP01001646
sc0000676	BLFP01003063
sc0000677	BLFP01000872
sc0000678	BLFP01001929
sc0000679	BLFP01002775
sc0000680	BLFP01001005
sc0000681	BLFP01001150
sc0000682	BLFP01001717
sc0000683	BLFP01002113
sc0000684	BLFP01004975
sc0000685	BLFP01004409
sc0000686	BLFP01002533
sc0000687	BLFP01002557
sc0000688	BLFP01003157
sc0000689	BLFP01000532
sc0000690	BLFP01000187
sc0000691	BLFP01000232
sc0000692	BLFP01004342
sc0000693	BLFP01004452
sc0000694	BLFP01003634
sc0000695	BLFP01003210
sc0000696	BLFP01002529
sc0000697	BLFP01001249
sc0000698	BLFP01000520
sc0000699	BLFP01005053
sc0000700	BLFP01004961
sc0000701	BLFP01001310
sc0000702	BLFP01003894
sc0000703	BLFP01002942
sc0000704	BLFP01002752
sc0000705	BLFP01002499
sc0000706	BLFP01001147
sc0000708	BLFP01004417
sc0000709	BLFP01003649
sc0000710	BLFP01002987
sc0000711	BLFP01002567
sc0000712	BLFP01003501
sc0000713	BLFP01003794
sc0000714	BLFP01003847
sc0000715	BLFP01002768
sc0000716	BLFP01003488
sc0000717	BLFP01004641
sc0000718	BLFP01005119
sc0000719	BLFP01000220
sc0000720	BLFP01000466
sc0000721	BLFP01002657
sc0000722	BLFP01004698
sc0000723	BLFP01001732
sc0000724	BLFP01003958
sc0000725	BLFP01000151
sc0000726	BLFP01002389
sc0000727	BLFP01003332
sc0000728	BLFP01001350
sc0000729	BLFP01000723
sc0000730	BLFP01004331
sc0000731	BLFP01001869
sc0000732	BLFP01002690
sc0000733	BLFP01001940
sc0000734	BLFP01002727
sc0000735	BLFP01001142
sc0000736	BLFP01001742
sc0000737	BLFP01004236
sc0000738	BLFP01002025
sc0000739	BLFP01002899
sc0000740	BLFP01001942
sc0000741	BLFP01003113
sc0000742	BLFP01002253
sc0000743	BLFP01004482
sc0000744	BLFP01003498
sc0000745	BLFP01005065
sc0000746	BLFP01001819
sc0000747	BLFP01001008
sc0000748	BLFP01001876
sc0000749	BLFP01004284
sc0000750	BLFP01002817
sc0000751	BLFP01000278
sc0000752	BLFP01001102
sc0000753	BLFP01001734
sc0000754	BLFP01001886
sc0000755	BLFP01002866
sc0000756	BLFP01003482
sc0000757	BLFP01004327
sc0000758	BLFP01000160
sc0000759	BLFP01000940
sc0000760	BLFP01000965
sc0000761	BLFP01001770
sc0000762	BLFP01005114
sc0000763	BLFP01000158
sc0000764	BLFP01004068
sc0000765	BLFP01002108
sc0000766	BLFP01003218
sc0000767	BLFP01000478
sc0000768	BLFP01001518
sc0000769	BLFP01005049
sc0000770	BLFP01002210
sc0000771	BLFP01004436
sc0000772	BLFP01000213
sc0000773	BLFP01004683
sc0000774	BLFP01001788
sc0000775	BLFP01001173
sc0000776	BLFP01002577
sc0000777	BLFP01001980
sc0000778	BLFP01004198
sc0000780	BLFP01001524
sc0000781	BLFP01003149
sc0000782	BLFP01001988
sc0000783	BLFP01004209
sc0000784	BLFP01003504
sc0000785	BLFP01001772
sc0000786	BLFP01002740
sc0000787	BLFP01001599
sc0000788	BLFP01001137
sc0000789	BLFP01002522
sc0000790	BLFP01003923
sc0000791	BLFP01003295
sc0000792	BLFP01004906
sc0000793	BLFP01001465
sc0000794	BLFP01000690
sc0000795	BLFP01003006
sc0000796	BLFP01002211
sc0000797	BLFP01003803
sc0000798	BLFP01000218
sc0000799	BLFP01004944
sc0000800	BLFP01003125
sc0000801	BLFP01000212
sc0000802	BLFP01004941
sc0000804	BLFP01003367
sc0000805	BLFP01000246
sc0000806	BLFP01003049
sc0000807	BLFP01003518
sc0000808	BLFP01001181
sc0000809	BLFP01001972
sc0000810	BLFP01004704
sc0000811	BLFP01001628
sc0000812	BLFP01004345
sc0000813	BLFP01003497
sc0000814	BLFP01005058
sc0000815	BLFP01000925
sc0000816	BLFP01002283
sc0000817	BLFP01004637
sc0000818	BLFP01003265
sc0000819	BLFP01002471
sc0000820	BLFP01003066
sc0000821	BLFP01002248
sc0000822	BLFP01003140
sc0000823	BLFP01002242
sc0000824	BLFP01004058
sc0000825	BLFP01003912
sc0000826	BLFP01004838
sc0000827	BLFP01000452
sc0000828	BLFP01001380
sc0000829	BLFP01001576
sc0000830	BLFP01003768
sc0000831	BLFP01004366
sc0000832	BLFP01002492
sc0000833	BLFP01003127
sc0000834	BLFP01000205
sc0000835	BLFP01000990
sc0000836	BLFP01004485
sc0000838	BLFP01003239
sc0000839	BLFP01003864
sc0000840	BLFP01004848
sc0000841	BLFP01000074
sc0000842	BLFP01001499
sc0000843	BLFP01000740
sc0000844	BLFP01004825
sc0000845	BLFP01004591
sc0000846	BLFP01003964
sc0000847	BLFP01003252
sc0000849	BLFP01001529
sc0000850	BLFP01002249
sc0000851	BLFP01003111
sc0000852	BLFP01000552
sc0000853	BLFP01001184
sc0000854	BLFP01002382
sc0000855	BLFP01003211
sc0000856	BLFP01001091
sc0000858	BLFP01000351
sc0000859	BLFP01003975
sc0000860	BLFP01003872
sc0000861	BLFP01004616
sc0000862	BLFP01001771
sc0000863	BLFP01000014
sc0000864	BLFP01002694
sc0000866	BLFP01003526
sc0000867	BLFP01002229
sc0000868	BLFP01000197
sc0000870	BLFP01001317
sc0000871	BLFP01003135
sc0000872	BLFP01001060
sc0000873	BLFP01001681
sc0000874	BLFP01004648
sc0000875	BLFP01004769
sc0000876	BLFP01002684
sc0000877	BLFP01003813
sc0000878	BLFP01000767
sc0000879	BLFP01001268
sc0000880	BLFP01000109
sc0000881	BLFP01005079
sc0000882	BLFP01001786
sc0000884	BLFP01000116
sc0000885	BLFP01004727
sc0000887	BLFP01002945
sc0000888	BLFP01002772
sc0000889	BLFP01002089
sc0000890	BLFP01003671
sc0000891	BLFP01003242
sc0000892	BLFP01002390
sc0000894	BLFP01003168
sc0000895	BLFP01002337
sc0000896	BLFP01001556
sc0000897	BLFP01000763
sc0000900	BLFP01003544
sc0000901	BLFP01002807
sc0000903	BLFP01001919
sc0000904	BLFP01001095
sc0000905	BLFP01000285
sc0000906	BLFP01003532
sc0000907	BLFP01003092
sc0000908	BLFP01004278
sc0000909	BLFP01003491
sc0000910	BLFP01003279
sc0000911	BLFP01000634
sc0000912	BLFP01001432
sc0000913	BLFP01002538
sc0000914	BLFP01003221
sc0000915	BLFP01003652
sc0000916	BLFP01004470
sc0000919	BLFP01001284
sc0000920	BLFP01001807
sc0000921	BLFP01004533
sc0000922	BLFP01000170
sc0000923	BLFP01003705
sc0000924	BLFP01004430
sc0000925	BLFP01002378
sc0000926	BLFP01003206
sc0000928	BLFP01001234
sc0000929	BLFP01000540
sc0000930	BLFP01003622
sc0000931	BLFP01003630
sc0000932	BLFP01004406
sc0000933	BLFP01005050
sc0000934	BLFP01000675
sc0000935	BLFP01000599
sc0000936	BLFP01001361
sc0000937	BLFP01002433
sc0000938	BLFP01002605
sc0000939	BLFP01003034
sc0000940	BLFP01000581
sc0000941	BLFP01004131
sc0000942	BLFP01002469
sc0000943	BLFP01000012
sc0000944	BLFP01004947
sc0000945	BLFP01000646
sc0000946	BLFP01001491
sc0000947	BLFP01002526
sc0000948	BLFP01000527
sc0000950	BLFP01000454
sc0000951	BLFP01002539
sc0000952	BLFP01001287
sc0000953	BLFP01003787
sc0000954	BLFP01002979
sc0000955	BLFP01002058
sc0000956	BLFP01003779
sc0000957	BLFP01000600
sc0000958	BLFP01004913
sc0000959	BLFP01001207
sc0000961	BLFP01001948
sc0000962	BLFP01004250
sc0000964	BLFP01000382
sc0000965	BLFP01002392
sc0000966	BLFP01001622
sc0000969	BLFP01004457
sc0000970	BLFP01004510
sc0000971	BLFP01000771
sc0000973	BLFP01000609
sc0000974	BLFP01001028
sc0000976	BLFP01002540
sc0000977	BLFP01005080
sc0000978	BLFP01003778
sc0000979	BLFP01001261
sc0000980	BLFP01002719
sc0000981	BLFP01003631
sc0000982	BLFP01001480
sc0000983	BLFP01004534
sc0000984	BLFP01003651
sc0000985	BLFP01002950
sc0000986	BLFP01002303
sc0000988	BLFP01002332
sc0000989	BLFP01001315
sc0000990	BLFP01002599
sc0000991	BLFP01000135
sc0000993	BLFP01001826
sc0000994	BLFP01002938
sc0000995	BLFP01001720
sc0000996	BLFP01004313
sc0000997	BLFP01002593
sc0000999	BLFP01004199
sc0001001	BLFP01004076
sc0001002	BLFP01000433
sc0001003	BLFP01002856
sc0001004	BLFP01002096
sc0001005	BLFP01002881
sc0001006	BLFP01002052
sc0001007	BLFP01001741
sc0001009	BLFP01003285
sc0001010	BLFP01000347
sc0001011	BLFP01002939
sc0001013	BLFP01000636
sc0001014	BLFP01002870
sc0001015	BLFP01001694
sc0001016	BLFP01000498
sc0001017	BLFP01000257
sc0001018	BLFP01004729
sc0001019	BLFP01004273
sc0001020	BLFP01004667
sc0001022	BLFP01004137
sc0001023	BLFP01002934
sc0001024	BLFP01002835
sc0001025	BLFP01004239
sc0001026	BLFP01002035
sc0001028	BLFP01003959
sc0001029	BLFP01005108
sc0001031	BLFP01000331
sc0001032	BLFP01004222
sc0001035	BLFP01002207
sc0001036	BLFP01001440
sc0001037	BLFP01004541
sc0001038	BLFP01002643
sc0001039	BLFP01002323
sc0001040	BLFP01000549
sc0001041	BLFP01000786
sc0001042	BLFP01001424
sc0001043	BLFP01002413
sc0001046	BLFP01004836
sc0001047	BLFP01000734
sc0001048	BLFP01001484
sc0001050	BLFP01001359
sc0001051	BLFP01002484
sc0001052	BLFP01002590
sc0001054	BLFP01004532
sc0001055	BLFP01000817
sc0001056	BLFP01001621
sc0001057	BLFP01002346
sc0001058	BLFP01002149
sc0001059	BLFP01003094
sc0001060	BLFP01002273
sc0001062	BLFP01001761
sc0001063	BLFP01001833
sc0001064	BLFP01000523
sc0001065	BLFP01003033
sc0001066	BLFP01002452
sc0001067	BLFP01003531
sc0001069	BLFP01001992
sc0001070	BLFP01000683
sc0001071	BLFP01000897
sc0001072	BLFP01001504
sc0001073	BLFP01002104
sc0001074	BLFP01002728
sc0001075	BLFP01003339
sc0001076	BLFP01002617
sc0001077	BLFP01000341
sc0001078	BLFP01003748
sc0001079	BLFP01002012
sc0001080	BLFP01001542
sc0001081	BLFP01002321
sc0001082	BLFP01002771
sc0001083	BLFP01003496
sc0001084	BLFP01004035
sc0001085	BLFP01000316
sc0001087	BLFP01001590
sc0001088	BLFP01002177
sc0001089	BLFP01002836
sc0001091	BLFP01001539
sc0001092	BLFP01004231
sc0001095	BLFP01003754
sc0001096	BLFP01001755
sc0001097	BLFP01004793
sc0001098	BLFP01001935
sc0001099	BLFP01002760
sc0001100	BLFP01000668
sc0001101	BLFP01002761
sc0001102	BLFP01001933
sc0001103	BLFP01002549
sc0001104	BLFP01002295
sc0001105	BLFP01004238
sc0001106	BLFP01003600
sc0001107	BLFP01004858
sc0001109	BLFP01001419
sc0001110	BLFP01000504
sc0001111	BLFP01001485
sc0001114	BLFP01003836
sc0001115	BLFP01004636
sc0001116	BLFP01002250
sc0001119	BLFP01001106
sc0001120	BLFP01000192
sc0001121	BLFP01001907
sc0001122	BLFP01004678
sc0001123	BLFP01000728
sc0001124	BLFP01002820
sc0001125	BLFP01001678
sc0001128	BLFP01004814
sc0001129	BLFP01004283
sc0001130	BLFP01003001
sc0001132	BLFP01004523
sc0001133	BLFP01000419
sc0001134	BLFP01003856
sc0001135	BLFP01000774
sc0001137	BLFP01002996
sc0001138	BLFP01000955
sc0001140	BLFP01002304
sc0001141	BLFP01002972
sc0001142	BLFP01000654
sc0001143	BLFP01001421
sc0001145	BLFP01004952
sc0001147	BLFP01004297
sc0001148	BLFP01000705
sc0001149	BLFP01002992
sc0001150	BLFP01004016
sc0001152	BLFP01001036
sc0001154	BLFP01002155
sc0001155	BLFP01004033
sc0001156	BLFP01003414
sc0001157	BLFP01003262
sc0001158	BLFP01002467
sc0001159	BLFP01004479
sc0001160	BLFP01002009
sc0001161	BLFP01002827
sc0001162	BLFP01000963
sc0001163	BLFP01001204
sc0001164	BLFP01000203
sc0001166	BLFP01003558
sc0001167	BLFP01002205
sc0001168	BLFP01001367
sc0001169	BLFP01000177
sc0001170	BLFP01002931
sc0001171	BLFP01003979
sc0001172	BLFP01004382
sc0001173	BLFP01001145
sc0001174	BLFP01001163
sc0001175	BLFP01003182
sc0001176	BLFP01003883
sc0001178	BLFP01003400
sc0001179	BLFP01004981
sc0001180	BLFP01001018
sc0001181	BLFP01000857
sc0001182	BLFP01004307
sc0001183	BLFP01002100
sc0001184	BLFP01004732
sc0001185	BLFP01001312
sc0001186	BLFP01000497
sc0001187	BLFP01002891
sc0001188	BLFP01004303
sc0001189	BLFP01003487
sc0001190	BLFP01001349
sc0001191	BLFP01000907
sc0001192	BLFP01000127
sc0001193	BLFP01004725
sc0001194	BLFP01004024
sc0001195	BLFP01003150
sc0001196	BLFP01002777
sc0001197	BLFP01002147
sc0001198	BLFP01001156
sc0001200	BLFP01002997
sc0001201	BLFP01002773
sc0001202	BLFP01001562
sc0001203	BLFP01001998
sc0001204	BLFP01004220
sc0001205	BLFP01000746
sc0001207	BLFP01004159
sc0001208	BLFP01001713
sc0001209	BLFP01003953
sc0001210	BLFP01001451
sc0001211	BLFP01003338
sc0001212	BLFP01004839
sc0001213	BLFP01001433
sc0001214	BLFP01000450
sc0001215	BLFP01004951
sc0001216	BLFP01001682
sc0001217	BLFP01004554
sc0001218	BLFP01003903
sc0001219	BLFP01002882
sc0001220	BLFP01002562
sc0001221	BLFP01000663
sc0001222	BLFP01000938
sc0001223	BLFP01000573
sc0001224	BLFP01004911
sc0001225	BLFP01003901
sc0001226	BLFP01004661
sc0001227	BLFP01004141
sc0001228	BLFP01003915
sc0001229	BLFP01004828
sc0001230	BLFP01001546
sc0001231	BLFP01004151
sc0001232	BLFP01000329
sc0001234	BLFP01004053
sc0001235	BLFP01002066
sc0001237	BLFP01003317
sc0001238	BLFP01004741
sc0001239	BLFP01002053
sc0001240	BLFP01005106
sc0001241	BLFP01003626
sc0001242	BLFP01004398
sc0001243	BLFP01004501
sc0001244	BLFP01003654
sc0001245	BLFP01005124
sc0001246	BLFP01001288
sc0001247	BLFP01001051
sc0001248	BLFP01000524
sc0001249	BLFP01002319
sc0001250	BLFP01002099
sc0001251	BLFP01004161
sc0001253	BLFP01002918
sc0001254	BLFP01002119
sc0001255	BLFP01001487
sc0001256	BLFP01000147
sc0001257	BLFP01002349
sc0001260	BLFP01005147
sc0001261	BLFP01002019
sc0001262	BLFP01004174
sc0001263	BLFP01002603
sc0001264	BLFP01001889
sc0001265	BLFP01004680
sc0001266	BLFP01001744
sc0001269	BLFP01002782
sc0001270	BLFP01003982
sc0001271	BLFP01001371
sc0001272	BLFP01001955
sc0001273	BLFP01000868
sc0001274	BLFP01000719
sc0001275	BLFP01004794
sc0001276	BLFP01000236
sc0001277	BLFP01001146
sc0001278	BLFP01001210
sc0001279	BLFP01002872
sc0001280	BLFP01000294
sc0001282	BLFP01001829
sc0001283	BLFP01002267
sc0001284	BLFP01000864
sc0001285	BLFP01000559
sc0001287	BLFP01004004
sc0001288	BLFP01003331
sc0001289	BLFP01000281
sc0001290	BLFP01002523
sc0001291	BLFP01004015
sc0001293	BLFP01000702
sc0001294	BLFP01001327
sc0001295	BLFP01000011
sc0001296	BLFP01004774
sc0001297	BLFP01003860
sc0001298	BLFP01004477
sc0001299	BLFP01002372
sc0001300	BLFP01002550
sc0001301	BLFP01002645
sc0001302	BLFP01002965
sc0001306	BLFP01004905
sc0001307	BLFP01003890
sc0001308	BLFP01004248
sc0001310	BLFP01002849
sc0001311	BLFP01002197
sc0001312	BLFP01001520
sc0001313	BLFP01001044
sc0001314	BLFP01000292
sc0001315	BLFP01004156
sc0001316	BLFP01002237
sc0001317	BLFP01001624
sc0001318	BLFP01000988
sc0001319	BLFP01000379
sc0001320	BLFP01002629
sc0001321	BLFP01003603
sc0001322	BLFP01003529
sc0001323	BLFP01004979
sc0001324	BLFP01000057
sc0001325	BLFP01001831
sc0001327	BLFP01001180
sc0001328	BLFP01000568
sc0001329	BLFP01005066
sc0001331	BLFP01003569
sc0001332	BLFP01004221
sc0001333	BLFP01003590
sc0001334	BLFP01000272
sc0001335	BLFP01003246
sc0001336	BLFP01001847
sc0001337	BLFP01001006
sc0001339	BLFP01004044
sc0001340	BLFP01004445
sc0001341	BLFP01000107
sc0001342	BLFP01004621
sc0001343	BLFP01000434
sc0001344	BLFP01000828
sc0001345	BLFP01001630
sc0001346	BLFP01002132
sc0001347	BLFP01003623
sc0001348	BLFP01003360
sc0001349	BLFP01004162
sc0001350	BLFP01002822
sc0001351	BLFP01002164
sc0001352	BLFP01004056
sc0001353	BLFP01003398
sc0001354	BLFP01004747
sc0001355	BLFP01001854
sc0001356	BLFP01003818
sc0001357	BLFP01001522
sc0001358	BLFP01000714
sc0001359	BLFP01002783
sc0001360	BLFP01003597
sc0001361	BLFP01000110
sc0001362	BLFP01000138
sc0001364	BLFP01001803
sc0001365	BLFP01001042
sc0001366	BLFP01005103
sc0001367	BLFP01003037
sc0001368	BLFP01001611
sc0001369	BLFP01001113
sc0001370	BLFP01003535
sc0001371	BLFP01004195
sc0001372	BLFP01001118
sc0001373	BLFP01001751
sc0001374	BLFP01002393
sc0001375	BLFP01002691
sc0001376	BLFP01002664
sc0001377	BLFP01003583
sc0001378	BLFP01004291
sc0001380	BLFP01004116
sc0001381	BLFP01001541
sc0001382	BLFP01004813
sc0001383	BLFP01000490
sc0001384	BLFP01000949
sc0001385	BLFP01001691
sc0001387	BLFP01002923
sc0001388	BLFP01003305
sc0001389	BLFP01004132
sc0001390	BLFP01000340
sc0001391	BLFP01000954
sc0001392	BLFP01001087
sc0001393	BLFP01001683
sc0001395	BLFP01003273
sc0001397	BLFP01002815
sc0001398	BLFP01001743
sc0001399	BLFP01001103
sc0001400	BLFP01001160
sc0001401	BLFP01001901
sc0001402	BLFP01000993
sc0001403	BLFP01001820
sc0001405	BLFP01002399
sc0001406	BLFP01001015
sc0001407	BLFP01001836
sc0001408	BLFP01004082
sc0001409	BLFP01000191
sc0001410	BLFP01003203
sc0001411	BLFP01003806
sc0001412	BLFP01000511
sc0001413	BLFP01002559
sc0001414	BLFP01002003
sc0001415	BLFP01004971
sc0001416	BLFP01003420
sc0001417	BLFP01004246
sc0001419	BLFP01000208
sc0001420	BLFP01002339
sc0001421	BLFP01003199
sc0001422	BLFP01000479
sc0001424	BLFP01001695
sc0001425	BLFP01004967
sc0001426	BLFP01000502
sc0001427	BLFP01001247
sc0001428	BLFP01001035
sc0001429	BLFP01005102
sc0001430	BLFP01003495
sc0001433	BLFP01003926
sc0001434	BLFP01002352
sc0001435	BLFP01004594
sc0001436	BLFP01001165
sc0001437	BLFP01000579
sc0001439	BLFP01002291
sc0001441	BLFP01001902
sc0001442	BLFP01001822
sc0001443	BLFP01000985
sc0001444	BLFP01000215
sc0001445	BLFP01003169
sc0001446	BLFP01001696
sc0001447	BLFP01001049
sc0001448	BLFP01000280
sc0001449	BLFP01003961
sc0001450	BLFP01003662
sc0001451	BLFP01005096
sc0001452	BLFP01001167
sc0001453	BLFP01001469
sc0001454	BLFP01000476
sc0001455	BLFP01002723
sc0001456	BLFP01003119
sc0001457	BLFP01002535
sc0001459	BLFP01001638
sc0001461	BLFP01004484
sc0001462	BLFP01001673
sc0001464	BLFP01000533
sc0001465	BLFP01003411
sc0001466	BLFP01000713
sc0001468	BLFP01001636
sc0001469	BLFP01002000
sc0001470	BLFP01004812
sc0001471	BLFP01002707
sc0001472	BLFP01001793
sc0001473	BLFP01000779
sc0001474	BLFP01002847
sc0001475	BLFP01005046
sc0001476	BLFP01000805
sc0001477	BLFP01001208
sc0001478	BLFP01002183
sc0001479	BLFP01003310
sc0001480	BLFP01002227
sc0001481	BLFP01004984
sc0001482	BLFP01001750
sc0001484	BLFP01000610
sc0001485	BLFP01000591
sc0001486	BLFP01003214
sc0001487	BLFP01002270
sc0001488	BLFP01004347
sc0001489	BLFP01003074
sc0001490	BLFP01000043
sc0001491	BLFP01000045
sc0001492	BLFP01004933
sc0001493	BLFP01004575
sc0001494	BLFP01002233
sc0001495	BLFP01002244
sc0001497	BLFP01000769
sc0001498	BLFP01001218
sc0001499	BLFP01001243
sc0001500	BLFP01004830
sc0001501	BLFP01003517
sc0001502	BLFP01001358
sc0001503	BLFP01004566
sc0001504	BLFP01000397
sc0001506	BLFP01000750
sc0001507	BLFP01001401
sc0001508	BLFP01004000
sc0001509	BLFP01002024
sc0001511	BLFP01003585
sc0001512	BLFP01002778
sc0001513	BLFP01001947
sc0001515	BLFP01001130
sc0001517	BLFP01003653
sc0001518	BLFP01002136
sc0001519	BLFP01002368
sc0001520	BLFP01003936
sc0001521	BLFP01000058
sc0001522	BLFP01002324
sc0001523	BLFP01003154
sc0001524	BLFP01003145
sc0001528	BLFP01000528
sc0001529	BLFP01001127
sc0001530	BLFP01005041
sc0001531	BLFP01003291
sc0001532	BLFP01003510
sc0001533	BLFP01000223
sc0001535	BLFP01001765
sc0001536	BLFP01002420
sc0001537	BLFP01002654
sc0001538	BLFP01001233
sc0001539	BLFP01005089
sc0001540	BLFP01001239
sc0001541	BLFP01000787
sc0001542	BLFP01005039
sc0001543	BLFP01000238
sc0001544	BLFP01001572
sc0001545	BLFP01001125
sc0001546	BLFP01000324
sc0001547	BLFP01004078
sc0001548	BLFP01004108
sc0001549	BLFP01003308
sc0001550	BLFP01004146
sc0001551	BLFP01000001
sc0001552	BLFP01003014
sc0001553	BLFP01003823
sc0001554	BLFP01001468
sc0001555	BLFP01003012
sc0001556	BLFP01004978
sc0001557	BLFP01000685
sc0001558	BLFP01003828
sc0001559	BLFP01004063
sc0001560	BLFP01004786
sc0001561	BLFP01001577
sc0001562	BLFP01001104
sc0001563	BLFP01002711
sc0001565	BLFP01004272
sc0001566	BLFP01003462
sc0001567	BLFP01004588
sc0001568	BLFP01001402
sc0001569	BLFP01000966
sc0001570	BLFP01000391
sc0001571	BLFP01003344
sc0001572	BLFP01004092
sc0001573	BLFP01002111
sc0001574	BLFP01002926
sc0001576	BLFP01002674
sc0001577	BLFP01004837
sc0001578	BLFP01003852
sc0001579	BLFP01004176
sc0001580	BLFP01002366
sc0001582	BLFP01000446
sc0001583	BLFP01004746
sc0001584	BLFP01000318
sc0001585	BLFP01000932
sc0001586	BLFP01001579
sc0001587	BLFP01002043
sc0001588	BLFP01002662
sc0001589	BLFP01003394
sc0001591	BLFP01004183
sc0001592	BLFP01000284
sc0001593	BLFP01000855
sc0001594	BLFP01001690
sc0001597	BLFP01003593
sc0001598	BLFP01004193
sc0001599	BLFP01000139
sc0001600	BLFP01003947
sc0001601	BLFP01003855
sc0001602	BLFP01003041
sc0001603	BLFP01002208
sc0001604	BLFP01001441
sc0001605	BLFP01000656
sc0001606	BLFP01004909
sc0001607	BLFP01004512
sc0001608	BLFP01003896
sc0001609	BLFP01004551
sc0001610	BLFP01000037
sc0001611	BLFP01001262
sc0001612	BLFP01001870
sc0001613	BLFP01003188
sc0001614	BLFP01003812
sc0001615	BLFP01004435
sc0001616	BLFP01002729
sc0001617	BLFP01001860
sc0001618	BLFP01001454
sc0001619	BLFP01000775
sc0001620	BLFP01004692
sc0001621	BLFP01004552
sc0001622	BLFP01004096
sc0001623	BLFP01000388
sc0001624	BLFP01003940
sc0001625	BLFP01000829
sc0001626	BLFP01001619
sc0001627	BLFP01002101
sc0001628	BLFP01002929
sc0001629	BLFP01004207
sc0001631	BLFP01003355
sc0001632	BLFP01000420
sc0001633	BLFP01000628
sc0001634	BLFP01001290
sc0001635	BLFP01002959
sc0001637	BLFP01004422
sc0001639	BLFP01004158
sc0001640	BLFP01002781
sc0001641	BLFP01001375
sc0001642	BLFP01000503
sc0001643	BLFP01000964
sc0001644	BLFP01000485
sc0001646	BLFP01003795
sc0001648	BLFP01002351
sc0001649	BLFP01001968
sc0001650	BLFP01004453
sc0001651	BLFP01004213
sc0001652	BLFP01002129
sc0001653	BLFP01000809
sc0001655	BLFP01004148
sc0001656	BLFP01000105
sc0001657	BLFP01005064
sc0001658	BLFP01003392
sc0001659	BLFP01003297
sc0001660	BLFP01002932
sc0001661	BLFP01001339
sc0001662	BLFP01004690
sc0001664	BLFP01003670
sc0001665	BLFP01004433
sc0001666	BLFP01004196
sc0001667	BLFP01002156
sc0001668	BLFP01002739
sc0001669	BLFP01000089
sc0001671	BLFP01002300
sc0001672	BLFP01001269
sc0001673	BLFP01002983
sc0001675	BLFP01004602
sc0001676	BLFP01003762
sc0001677	BLFP01004879
sc0001678	BLFP01004817
sc0001680	BLFP01001554
sc0001681	BLFP01004038
sc0001682	BLFP01000308
sc0001683	BLFP01000858
sc0001686	BLFP01002811
sc0001687	BLFP01004613
sc0001688	BLFP01003987
sc0001689	BLFP01000190
sc0001690	BLFP01000248
sc0001691	BLFP01003237
sc0001692	BLFP01003702
sc0001693	BLFP01000320
sc0001695	BLFP01005141
sc0001696	BLFP01000456
sc0001698	BLFP01002334
sc0001699	BLFP01002512
sc0001701	BLFP01002204
sc0001702	BLFP01001443
sc0001704	BLFP01004931
sc0001705	BLFP01000065
sc0001707	BLFP01003358
sc0001708	BLFP01002943
sc0001709	BLFP01002459
sc0001710	BLFP01002483
sc0001712	BLFP01003717
sc0001713	BLFP01004499
sc0001714	BLFP01004895
sc0001715	BLFP01000643
sc0001716	BLFP01001721
sc0001717	BLFP01001887
sc0001718	BLFP01003190
sc0001719	BLFP01003800
sc0001720	BLFP01004936
sc0001721	BLFP01001019
sc0001722	BLFP01003935
sc0001723	BLFP01004531
sc0001724	BLFP01002310
sc0001725	BLFP01002974
sc0001726	BLFP01000789
sc0001727	BLFP01000860
sc0001728	BLFP01000335
sc0001729	BLFP01004803
sc0001730	BLFP01001680
sc0001731	BLFP01002506
sc0001732	BLFP01004744
sc0001733	BLFP01000133
sc0001734	BLFP01002596
sc0001735	BLFP01003592
sc0001736	BLFP01002167
sc0001737	BLFP01002838
sc0001738	BLFP01000939
sc0001739	BLFP01001551
sc0001740	BLFP01002005
sc0001742	BLFP01001129
sc0001743	BLFP01001686
sc0001745	BLFP01000150
sc0001746	BLFP01003464
sc0001747	BLFP01004305
sc0001748	BLFP01001927
sc0001749	BLFP01002764
sc0001750	BLFP01004481
sc0001752	BLFP01002453
sc0001753	BLFP01001754
sc0001754	BLFP01001300
sc0001756	BLFP01001024
sc0001757	BLFP01004098
sc0001758	BLFP01003742
sc0001760	BLFP01001277
sc0001762	BLFP01002946
sc0001763	BLFP01003970
sc0001764	BLFP01001828
sc0001765	BLFP01001985
sc0001766	BLFP01004323
sc0001768	BLFP01002313
sc0001769	BLFP01003118
sc0001770	BLFP01001012
sc0001771	BLFP01004856
sc0001772	BLFP01002793
sc0001773	BLFP01003528
sc0001774	BLFP01001157
sc0001776	BLFP01000960
sc0001777	BLFP01001775
sc0001778	BLFP01002916
sc0001779	BLFP01004362
sc0001780	BLFP01004598
sc0001781	BLFP01003777
sc0001782	BLFP01004893
sc0001783	BLFP01000409
sc0001784	BLFP01001447
sc0001785	BLFP01000638
sc0001787	BLFP01004003
sc0001788	BLFP01000822
sc0001790	BLFP01001082
sc0001792	BLFP01003599
sc0001793	BLFP01002646
sc0001794	BLFP01003851
sc0001796	BLFP01001070
sc0001797	BLFP01000471
sc0001798	BLFP01002572
sc0001799	BLFP01001725
sc0001800	BLFP01003557
sc0001801	BLFP01004408
sc0001802	BLFP01001960
sc0001803	BLFP01002611
sc0001804	BLFP01003475
sc0001805	BLFP01004124
sc0001806	BLFP01001967
sc0001807	BLFP01001105
sc0001808	BLFP01001764
sc0001810	BLFP01001700
sc0001811	BLFP01001445
sc0001812	BLFP01002463
sc0001813	BLFP01002031
sc0001814	BLFP01000919
sc0001815	BLFP01000437
sc0001817	BLFP01004380
sc0001818	BLFP01003402
sc0001819	BLFP01002792
sc0001820	BLFP01002145
sc0001821	BLFP01004660
sc0001822	BLFP01003820
sc0001825	BLFP01004666
sc0001826	BLFP01003805
sc0001829	BLFP01003565
sc0001830	BLFP01000307
sc0001831	BLFP01003469
sc0001832	BLFP01004020
sc0001833	BLFP01002583
sc0001836	BLFP01001094
sc0001837	BLFP01002839
sc0001840	BLFP01002454
sc0001841	BLFP01001428
sc0001842	BLFP01000444
sc0001843	BLFP01000657
sc0001844	BLFP01004908
sc0001845	BLFP01001868
sc0001846	BLFP01001776
sc0001847	BLFP01003253
sc0001848	BLFP01002438
sc0001849	BLFP01004440
sc0001850	BLFP01004179
sc0001851	BLFP01003939
sc0001852	BLFP01000162
sc0001853	BLFP01003580
sc0001854	BLFP01004055
sc0001855	BLFP01004687
sc0001856	BLFP01000418
sc0001857	BLFP01002952
sc0001858	BLFP01000862
sc0001859	BLFP01004528
sc0001861	BLFP01001937
sc0001862	BLFP01004989
sc0001864	BLFP01001223
sc0001865	BLFP01001981
sc0001866	BLFP01005002
sc0001867	BLFP01003790
sc0001868	BLFP01003527
sc0001870	BLFP01003098
sc0001871	BLFP01004932
sc0001872	BLFP01000049
sc0001873	BLFP01003850
sc0001874	BLFP01004597
sc0001875	BLFP01004855
sc0001876	BLFP01000619
sc0001877	BLFP01001626
sc0001879	BLFP01003236
sc0001880	BLFP01001394
sc0001882	BLFP01002595
sc0001883	BLFP01002886
sc0001884	BLFP01000473
sc0001885	BLFP01004145
sc0001887	BLFP01003944
sc0001888	BLFP01004447
sc0001889	BLFP01000784
sc0001890	BLFP01000627
sc0001891	BLFP01003821
sc0001892	BLFP01002953
sc0001893	BLFP01003942
sc0001894	BLFP01003226
sc0001895	BLFP01000364
sc0001896	BLFP01004030
sc0001897	BLFP01000781
sc0001899	BLFP01003046
sc0001900	BLFP01001084
sc0001901	BLFP01000313
sc0001902	BLFP01003884
sc0001903	BLFP01002212
sc0001904	BLFP01004251
sc0001905	BLFP01003423
sc0001906	BLFP01002634
sc0001907	BLFP01002580
sc0001908	BLFP01001789
sc0001909	BLFP01000971
sc0001910	BLFP01001255
sc0001911	BLFP01000693
sc0001912	BLFP01001434
sc0001913	BLFP01001547
sc0001914	BLFP01002343
sc0001915	BLFP01002474
sc0001916	BLFP01002614
sc0001917	BLFP01003474
sc0001918	BLFP01004328
sc0001919	BLFP01005137
sc0001920	BLFP01002360
sc0001923	BLFP01001425
sc0001926	BLFP01004377
sc0001927	BLFP01003471
sc0001928	BLFP01004321
sc0001929	BLFP01002143
sc0001930	BLFP01003567
sc0001931	BLFP01004516
sc0001932	BLFP01002312
sc0001933	BLFP01000442
sc0001934	BLFP01001219
sc0001935	BLFP01000631
sc0001936	BLFP01001166
sc0001937	BLFP01001893
sc0001938	BLFP01004902
sc0001939	BLFP01003893
sc0001940	BLFP01003494
sc0001941	BLFP01002917
sc0001942	BLFP01001934
sc0001944	BLFP01001116
sc0001945	BLFP01000159
sc0001946	BLFP01004214
sc0001947	BLFP01000273
sc0001948	BLFP01003609
sc0001950	BLFP01000974
sc0001952	BLFP01001168
sc0001953	BLFP01002476
sc0001954	BLFP01005023
sc0001955	BLFP01002160
sc0001956	BLFP01004341
sc0001958	BLFP01002748
sc0001959	BLFP01001814
sc0001960	BLFP01002411
sc0001961	BLFP01003522
sc0001962	BLFP01003776
sc0001963	BLFP01000144
sc0001964	BLFP01004211
sc0001966	BLFP01000383
sc0001967	BLFP01002472
sc0001969	BLFP01003612
sc0001970	BLFP01000067
sc0001971	BLFP01000670
sc0001972	BLFP01004916
sc0001973	BLFP01002225
sc0001974	BLFP01001348
sc0001975	BLFP01003186
sc0001976	BLFP01002672
sc0001977	BLFP01004466
sc0001978	BLFP01003808
sc0001979	BLFP01005112
sc0001980	BLFP01001607
sc0001981	BLFP01001148
sc0001982	BLFP01000574
sc0001983	BLFP01003165
sc0001984	BLFP01001308
sc0001985	BLFP01004442
sc0001987	BLFP01000111
sc0001989	BLFP01000720
sc0001990	BLFP01001796
sc0001991	BLFP01004600
sc0001993	BLFP01004599
sc0001994	BLFP01001882
sc0001996	BLFP01005060
sc0001997	BLFP01002064
sc0001998	BLFP01001597
sc0001999	BLFP01003016
sc0002000	BLFP01004296
sc0002001	BLFP01000288
sc0002002	BLFP01001025
sc0002003	BLFP01001840
sc0002005	BLFP01002683
sc0002006	BLFP01003525
sc0002008	BLFP01003840
sc0002009	BLFP01004208
sc0002010	BLFP01001817
sc0002011	BLFP01003126
sc0002013	BLFP01004373
sc0002014	BLFP01004293
sc0002015	BLFP01005134
sc0002016	BLFP01001178
sc0002017	BLFP01001306
sc0002019	BLFP01003499
sc0002020	BLFP01000194
sc0002021	BLFP01003321
sc0002023	BLFP01003162
sc0002024	BLFP01002721
sc0002026	BLFP01002718
sc0002027	BLFP01004869
sc0002028	BLFP01003819
sc0002029	BLFP01004274
sc0002030	BLFP01001999
sc0002031	BLFP01005153
sc0002032	BLFP01003918
sc0002033	BLFP01001403
sc0002034	BLFP01004654
sc0002035	BLFP01001921
sc0002036	BLFP01002786
sc0002037	BLFP01004520
sc0002038	BLFP01004094
sc0002039	BLFP01004782
sc0002040	BLFP01003992
sc0002041	BLFP01003418
sc0002043	BLFP01002993
sc0002045	BLFP01001037
sc0002046	BLFP01003192
sc0002047	BLFP01002592
sc0002048	BLFP01002027
sc0002053	BLFP01000303
sc0002054	BLFP01000911
sc0002055	BLFP01001517
sc0002056	BLFP01002862
sc0002057	BLFP01003449
sc0002058	BLFP01004041
sc0002059	BLFP01002103
sc0002060	BLFP01000699
sc0002061	BLFP01003669
sc0002063	BLFP01002687
sc0002064	BLFP01003195
sc0002071	BLFP01004458
sc0002072	BLFP01002386
sc0002073	BLFP01000804
sc0002074	BLFP01005048
sc0002075	BLFP01000094
sc0002077	BLFP01001069
sc0002078	BLFP01001194
sc0002080	BLFP01004910
sc0002082	BLFP01003767
sc0002084	BLFP01002503
sc0002086	BLFP01000861
sc0002087	BLFP01004508
sc0002088	BLFP01001904
sc0002089	BLFP01001969
sc0002090	BLFP01001083
sc0002091	BLFP01003646
sc0002092	BLFP01003573
sc0002093	BLFP01002712
sc0002094	BLFP01001873
sc0002095	BLFP01001143
sc0002096	BLFP01002649
sc0002097	BLFP01003103
sc0002098	BLFP01001747
sc0002099	BLFP01003381
sc0002100	BLFP01000350
sc0002101	BLFP01003399
sc0002103	BLFP01002173
sc0002104	BLFP01004061
sc0002106	BLFP01002844
sc0002107	BLFP01001659
sc0002109	BLFP01000421
sc0002113	BLFP01002975
sc0002116	BLFP01000460
sc0002117	BLFP01005047
sc0002118	BLFP01000399
sc0002119	BLFP01003627
sc0002122	BLFP01001651
sc0002123	BLFP01001193
sc0002124	BLFP01000555
sc0002125	BLFP01003159
sc0002126	BLFP01002541
sc0002127	BLFP01001227
sc0002128	BLFP01000615
sc0002129	BLFP01003117
sc0002130	BLFP01002671
sc0002132	BLFP01004290
sc0002134	BLFP01002706
sc0002135	BLFP01001858
sc0002136	BLFP01002490
sc0002137	BLFP01005149
sc0002138	BLFP01000921
sc0002139	BLFP01004229
sc0002140	BLFP01003425
sc0002143	BLFP01000361
sc0002144	BLFP01000929
sc0002145	BLFP01004268
sc0002147	BLFP01003568
sc0002148	BLFP01004043
sc0002149	BLFP01001760
sc0002151	BLFP01000649
sc0002152	BLFP01001283
sc0002154	BLFP01004785
sc0002155	BLFP01003853
sc0002156	BLFP01004624
sc0002157	BLFP01002228
sc0002158	BLFP01003029
sc0002159	BLFP01002854
sc0002162	BLFP01004694
sc0002163	BLFP01000794
sc0002164	BLFP01000390
sc0002165	BLFP01002120
sc0002166	BLFP01001604
sc0002169	BLFP01004737
sc0002171	BLFP01000824
sc0002172	BLFP01003177
sc0002173	BLFP01000914
sc0002174	BLFP01001566
sc0002175	BLFP01003353
sc0002176	BLFP01004740
sc0002178	BLFP01004025
sc0002179	BLFP01001246
sc0002180	BLFP01004699
sc0002181	BLFP01003130
sc0002185	BLFP01003296
sc0002186	BLFP01004121
sc0002187	BLFP01002081
sc0002188	BLFP01002885
sc0002190	BLFP01003166
sc0002191	BLFP01004695
sc0002192	BLFP01004509
sc0002193	BLFP01000839
sc0002194	BLFP01005070
sc0002195	BLFP01002084
sc0002196	BLFP01001304
sc0002197	BLFP01003201
sc0002198	BLFP01002362
sc0002199	BLFP01002809
sc0002201	BLFP01000298
sc0002203	BLFP01000666
sc0002204	BLFP01001459
sc0002206	BLFP01002051
sc0002207	BLFP01003817
sc0002208	BLFP01004399
sc0002209	BLFP01000392
sc0002211	BLFP01000624
sc0002212	BLFP01001039
sc0002213	BLFP01002169
sc0002214	BLFP01004262
sc0002215	BLFP01003838
sc0002216	BLFP01004885
sc0002218	BLFP01001774
sc0002219	BLFP01002762
sc0002220	BLFP01003322
sc0002223	BLFP01001516
sc0002224	BLFP01000943
sc0002225	BLFP01000306
sc0002226	BLFP01001212
sc0002227	BLFP01003413
sc0002228	BLFP01005043
sc0002229	BLFP01003688
sc0002230	BLFP01002705
sc0002232	BLFP01004788
sc0002233	BLFP01001525
sc0002235	BLFP01002114
sc0002237	BLFP01003372
sc0002241	BLFP01000330
sc0002242	BLFP01004921
sc0002244	BLFP01004750
sc0002245	BLFP01003050
sc0002246	BLFP01003687
[truncated: 1,590 more rows]
